# Supplementary material for: Automated Hypothesis Generation to Identify Signals Relevant in the Development of Mammalian Cell and Tissue Bioprocesses, With Validation in a Retinal Culture System
Source: Front Bioeng Biotechnol. 2020 Jun 4;8:534. doi: 10.3389/fbioe.2020.00534 (PMC7287043; doi:10.3389/fbioe.2020.00534)
Supplement: TABLE S1 — Annotation and accession information for all datasets used in this study. [file Table_1.XLSX]

## Sheet: gsmAllAnnotated
	ID	title	gsm	series_id	gpl	status	submission_date	last_update_date	type	source_name_ch1	organism_ch1	characteristics_ch1	molecule_ch1	label_ch1	treatment_protocol_ch1	extract_protocol_ch1	label_protocol_ch1	source_name_ch2	organism_ch2	characteristics_ch2	molecule_ch2	label_ch2	treatment_protocol_ch2	extract_protocol_ch2	label_protocol_ch2	hyb_protocol	description	data_processing	contact	supplementary_file	data_row_count	channel_count	category
1	69504	retina_DBA_543L_8mo_rep1	GSM81688	GSE3554	GPL1261	Public on Nov 04 2005	2005-11-03	2005-11-03	RNA	Animal id 543, left retina, 8 months, female, DBA/2J	Mus musculus	Age: 8 months, Sex: Female, Retina: left, Final IOP (mm Hg): 25.3, Strain:DBA/2J	total RNA	biotin	NA	Whole retinas were removed from 3, and 8 month old DBA/2J mice and rinsed in ice-cold 0.1 M phosphate buffered saline to remove blood. Three individual retinas at each age were homogenized in Qiagen RLT buffer using a micro pestle and pulled five times through a 22G needle, then flash frozen in liquid nitrogen.	Total RNA was isolated using a Qiagen RNeasy Kit. The quantity and quality of the RNA was assessed using a Nanodrop ND1000 spectrophotometer and an Agilent 2100 Bioanalyzer. 20ng of each retinal RNA sample was amplified, fractionated, and labeled with a NuGEN Ovation Biotin kit to generate probe for Affymetrix microarray analysis.	NA	NA	NA	NA	NA	NA	NA	NA	standard Affymetrix procedures	Eight month old female DBA/2J mouse retina	All preprocessing of Affymetrix data was performed using the Bioconductor Package in the R statistical environment. Data set analysis done under the R statistical environment version 1.9.0 on i686-pc-linux-gnu. Bioconductor package 'affy' version 1.4.32, 'gcrma' version 1.1.0, 'siggenes'(R sam analysis) version 1.0.6.	Name: Monica,L.,Vetter; Email: monica@neuro.utah.edu; Phone: (801) 581-4984; Fax: (801) 581-4233; Laboratory: Vetter Lab; Department: Neurobiology & Anatomy; Institute: University of Utah; Address: 20 North, 1900 East Rm. 517 Wintrobe; City: Salt Lake City ; State: UT; Zip/postal_code: 84132-3401; Country: USA	ftp://ftp.ncbi.nlm.nih.gov/geo/samples/GSM81nnn/GSM81688/suppl/GSM81688.CEL.gz	45101	1	not.included
2	69505	retina_DBA_544R_8mo_rep2	GSM81689	GSE3554	GPL1261	Public on Nov 04 2005	2005-11-03	2005-11-03	RNA	Animal id 544, right retina, 8 months, female, DBA/2J	Mus musculus	Age: 8 months, Sex: Female, Retina: right, Final IOP (mm Hg): 26.5, Strain:DBA/2J	total RNA	biotin	NA	Whole retinas were removed from 3, and 8 month old DBA/2J mice and rinsed in ice-cold 0.1 M phosphate buffered saline to remove blood. Three individual retinas at each age were homogenized in Qiagen RLT buffer using a micro pestle and pulled five times through a 22G needle, then flash frozen in liquid nitrogen.	Total RNA was isolated using a Qiagen RNeasy Kit. The quantity and quality of the RNA was assessed using a Nanodrop ND1000 spectrophotometer and an Agilent 2100 Bioanalyzer. 20ng of each retinal RNA sample was amplified, fractionated, and labeled with a NuGEN Ovation Biotin kit to generate probe for Affymetrix microarray analysis.	NA	NA	NA	NA	NA	NA	NA	NA	standard Affymetrix procedures	Eight month old female DBA/2J mouse retina	All preprocessing of Affymetrix data was performed using the Bioconductor Package in the R statistical environment. Data set analysis done under the R statistical environment version 1.9.0 on i686-pc-linux-gnu. Bioconductor package 'affy' version 1.4.32, 'gcrma' version 1.1.0, 'siggenes'(R sam analysis) version 1.0.6.	Name: Monica,L.,Vetter; Email: monica@neuro.utah.edu; Phone: (801) 581-4984; Fax: (801) 581-4233; Laboratory: Vetter Lab; Department: Neurobiology & Anatomy; Institute: University of Utah; Address: 20 North, 1900 East Rm. 517 Wintrobe; City: Salt Lake City ; State: UT; Zip/postal_code: 84132-3401; Country: USA	ftp://ftp.ncbi.nlm.nih.gov/geo/samples/GSM81nnn/GSM81689/suppl/GSM81689.CEL.gz	45101	1	not.included
3	69506	retina_DBA_552R_8mo_rep3	GSM81690	GSE3554	GPL1261	Public on Nov 04 2005	2005-11-03	2005-11-03	RNA	Animal id 552, right retina, 8 months, female, DBA/2J	Mus musculus	Age: 8 months, Sex: Female, Retina: right, Final IOP (mm Hg): 30.4, Strain:DBA/2J	total RNA	biotin	NA	Whole retinas were removed from 3, and 8 month old DBA/2J mice and rinsed in ice-cold 0.1 M phosphate buffered saline to remove blood. Three individual retinas at each age were homogenized in Qiagen RLT buffer using a micro pestle and pulled five times through a 22G needle, then flash frozen in liquid nitrogen.	Total RNA was isolated using a Qiagen RNeasy Kit. The quantity and quality of the RNA was assessed using a Nanodrop ND1000 spectrophotometer and an Agilent 2100 Bioanalyzer. 20ng of each retinal RNA sample was amplified, fractionated, and labeled with a NuGEN Ovation Biotin kit to generate probe for Affymetrix microarray analysis.	NA	NA	NA	NA	NA	NA	NA	NA	standard Affymetrix procedures	Eight month old female DBA/2J mouse retina	All preprocessing of Affymetrix data was performed using the Bioconductor Package in the R statistical environment. Data set analysis done under the R statistical environment version 1.9.0 on i686-pc-linux-gnu. Bioconductor package 'affy' version 1.4.32, 'gcrma' version 1.1.0, 'siggenes'(R sam analysis) version 1.0.6.	Name: Monica,L.,Vetter; Email: monica@neuro.utah.edu; Phone: (801) 581-4984; Fax: (801) 581-4233; Laboratory: Vetter Lab; Department: Neurobiology & Anatomy; Institute: University of Utah; Address: 20 North, 1900 East Rm. 517 Wintrobe; City: Salt Lake City ; State: UT; Zip/postal_code: 84132-3401; Country: USA	ftp://ftp.ncbi.nlm.nih.gov/geo/samples/GSM81nnn/GSM81690/suppl/GSM81690.CEL.gz	45101	1	not.included
4	69507	retina_DBA_1024L_3mo_rep1	GSM81691	GSE3554	GPL1261	Public on Nov 04 2005	2005-11-03	2005-11-03	RNA	Animal id 1024, left retina, 3 months, female, DBA/2J	Mus musculus	Age: 3 months, Sex: Female, Retina: left, Final IOP (mm Hg): 19.1, Strain:DBA/2J	total RNA	biotin	NA	Whole retinas were removed from 3, and 8 month old DBA/2J mice and rinsed in ice-cold 0.1 M phosphate buffered saline to remove blood. Three individual retinas at each age were homogenized in Qiagen RLT buffer using a micro pestle and pulled five times through a 22G needle, then flash frozen in liquid nitrogen.	Total RNA was isolated using a Qiagen RNeasy Kit. The quantity and quality of the RNA was assessed using a Nanodrop ND1000 spectrophotometer and an Agilent 2100 Bioanalyzer. 20ng of each retinal RNA sample was amplified, fractionated, and labeled with a NuGEN Ovation Biotin kit to generate probe for Affymetrix microarray analysis.	NA	NA	NA	NA	NA	NA	NA	NA	standard Affymetrix procedures	Three month old female DBA/2J mouse retina	All preprocessing of Affymetrix data was performed using the Bioconductor Package in the R statistical environment. Data set analysis done under the R statistical environment version 1.9.0 on i686-pc-linux-gnu. Bioconductor package 'affy' version 1.4.32, 'gcrma' version 1.1.0, 'siggenes'(R sam analysis) version 1.0.6.	Name: Monica,L.,Vetter; Email: monica@neuro.utah.edu; Phone: (801) 581-4984; Fax: (801) 581-4233; Laboratory: Vetter Lab; Department: Neurobiology & Anatomy; Institute: University of Utah; Address: 20 North, 1900 East Rm. 517 Wintrobe; City: Salt Lake City ; State: UT; Zip/postal_code: 84132-3401; Country: USA	ftp://ftp.ncbi.nlm.nih.gov/geo/samples/GSM81nnn/GSM81691/suppl/GSM81691.CEL.gz	45101	1	whole.retina
5	69508	retina_DBA_1025L_3mo_rep2	GSM81692	GSE3554	GPL1261	Public on Nov 04 2005	2005-11-03	2005-11-03	RNA	Animal id 1025, left retina, 3 months, female, DBA/2J	Mus musculus	Age: 3 months, Sex: Female, Retina: left, Final IOP (mm Hg): 15.3, Strain:DBA/2J	total RNA	biotin	NA	Whole retinas were removed from 3, and 8 month old DBA/2J mice and rinsed in ice-cold 0.1 M phosphate buffered saline to remove blood. Three individual retinas at each age were homogenized in Qiagen RLT buffer using a micro pestle and pulled five times through a 22G needle, then flash frozen in liquid nitrogen.	Total RNA was isolated using a Qiagen RNeasy Kit. The quantity and quality of the RNA was assessed using a Nanodrop ND1000 spectrophotometer and an Agilent 2100 Bioanalyzer. 20ng of each retinal RNA sample was amplified, fractionated, and labeled with a NuGEN Ovation Biotin kit to generate probe for Affymetrix microarray analysis.	NA	NA	NA	NA	NA	NA	NA	NA	standard Affymetrix procedures	Three month old female DBA/2J mouse retina	All preprocessing of Affymetrix data was performed using the Bioconductor Package in the R statistical environment. Data set analysis done under the R statistical environment version 1.9.0 on i686-pc-linux-gnu. Bioconductor package 'affy' version 1.4.32, 'gcrma' version 1.1.0, 'siggenes'(R sam analysis) version 1.0.6.	Name: Monica,L.,Vetter; Email: monica@neuro.utah.edu; Phone: (801) 581-4984; Fax: (801) 581-4233; Laboratory: Vetter Lab; Department: Neurobiology & Anatomy; Institute: University of Utah; Address: 20 North, 1900 East Rm. 517 Wintrobe; City: Salt Lake City ; State: UT; Zip/postal_code: 84132-3401; Country: USA	ftp://ftp.ncbi.nlm.nih.gov/geo/samples/GSM81nnn/GSM81692/suppl/GSM81692.CEL.gz	45101	1	whole.retina
6	69509	retina_DBA_1026L_3mo_rep3	GSM81693	GSE3554	GPL1261	Public on Nov 04 2005	2005-11-03	2005-11-03	RNA	Animal id 1026, left retina, 3 months, female, DBA/2J	Mus musculus	Age: 3 months, Sex: Female, Retina: left, Final IOP (mm Hg): 18.2, Strain:DBA/2J	total RNA	biotin	NA	Whole retinas were removed from 3, and 8 month old DBA/2J mice and rinsed in ice-cold 0.1 M phosphate buffered saline to remove blood. Three individual retinas at each age were homogenized in Qiagen RLT buffer using a micro pestle and pulled five times through a 22G needle, then flash frozen in liquid nitrogen.	Total RNA was isolated using a Qiagen RNeasy Kit. The quantity and quality of the RNA was assessed using a Nanodrop ND1000 spectrophotometer and an Agilent 2100 Bioanalyzer. 20ng of each retinal RNA sample was amplified, fractionated, and labeled with a NuGEN Ovation Biotin kit to generate probe for Affymetrix microarray analysis.	NA	NA	NA	NA	NA	NA	NA	NA	standard Affymetrix procedures	Three month old female DBA/2J mouse retina	All preprocessing of Affymetrix data was performed using the Bioconductor Package in the R statistical environment. Data set analysis done under the R statistical environment version 1.9.0 on i686-pc-linux-gnu. Bioconductor package 'affy' version 1.4.32, 'gcrma' version 1.1.0, 'siggenes'(R sam analysis) version 1.0.6.	Name: Monica,L.,Vetter; Email: monica@neuro.utah.edu; Phone: (801) 581-4984; Fax: (801) 581-4233; Laboratory: Vetter Lab; Department: Neurobiology & Anatomy; Institute: University of Utah; Address: 20 North, 1900 East Rm. 517 Wintrobe; City: Salt Lake City ; State: UT; Zip/postal_code: 84132-3401; Country: USA	ftp://ftp.ncbi.nlm.nih.gov/geo/samples/GSM81nnn/GSM81693/suppl/GSM81693.CEL.gz	45101	1	whole.retina
7	80124	Nrl-ko-Gfp E16 replicate 1	GSM92614	GSE4051	GPL1261	Public on Feb 28 2006	2006-01-16	2006-01-18	RNA	Gfp+ photoreceptor cells	Mus musculus	Nrl-ko-Gfp, Gfp+ photoreceptor cells	total RNA	Biotin	NA	mRNA was amplified using Nugene kit	Nugene kit protocol	NA	NA	NA	NA	NA	NA	NA	NA	Affymetrix standard	Nrl-ko mice were mated with wt-Gfp mice in which Gfp expression is driven by Nrl promoter. Gfp+ photoreceptors were purified by FACS and RNA was extracted and amplified by Nugene kit.; This is Nrl-ko-Gfp E16 replicate 1.	RMA	Name: Swaroop Anand; Email: swaroop@umich.edu; Phone: 734-615 2246; Department: Ophthalmology & Visual Sciences; Institute: University of Michigan; Address: 1000 Wall St.; City: Ann Arbor; State: MI; Zip/postal_code: 48105; Country: USA; Web_link: http://www.umich.edu/~retina	ftp://ftp.ncbi.nlm.nih.gov/geo/samples/GSM92nnn/GSM92614/suppl/GSM92614.CEL.gz	45101	1	not.included
8	80125	Nrl-ko-Gfp E16 replicate 2	GSM92615	GSE4051	GPL1261	Public on Feb 28 2006	2006-01-16	2006-01-18	RNA	Gfp+ photoreceptor cells	Mus musculus	Nrl-ko-Gfp, Gfp+ photoreceptor cells	total RNA	Biotin	NA	mRNA was amplified using Nugene kit	Nugene kit protocol	NA	NA	NA	NA	NA	NA	NA	NA	Affymetrix standard	Nrl-ko mice were mated with wt-Gfp mice in which Gfp expression is driven by Nrl promoter. Gfp+ photoreceptors were purified by FACS and RNA was extracted and amplified by Nugene kit.; This is Nrl-ko-Gfp E16 replicate 2.	RMA	Name: Swaroop Anand; Email: swaroop@umich.edu; Phone: 734-615 2246; Department: Ophthalmology & Visual Sciences; Institute: University of Michigan; Address: 1000 Wall St.; City: Ann Arbor; State: MI; Zip/postal_code: 48105; Country: USA; Web_link: http://www.umich.edu/~retina	ftp://ftp.ncbi.nlm.nih.gov/geo/samples/GSM92nnn/GSM92615/suppl/GSM92615.CEL.gz	45101	1	not.included
9	80126	Nrl-ko-Gfp E16 replicate 3	GSM92616	GSE4051	GPL1261	Public on Feb 28 2006	2006-01-16	2006-01-18	RNA	Gfp+ photoreceptor cells	Mus musculus	Nrl-ko-Gfp, Gfp+ photoreceptor cells	total RNA	Biotin	NA	mRNA was amplified using Nugene kit	Nugene kit protocol	NA	NA	NA	NA	NA	NA	NA	NA	Affymetrix standard	Nrl-ko mice were mated with wt-Gfp mice in which Gfp expression is driven by Nrl promoter. Gfp+ photoreceptors were purified by FACS and RNA was extracted and amplified by Nugene kit.; This is Nrl-ko-Gfp E16 replicate 3.	RMA	Name: Swaroop Anand; Email: swaroop@umich.edu; Phone: 734-615 2246; Department: Ophthalmology & Visual Sciences; Institute: University of Michigan; Address: 1000 Wall St.; City: Ann Arbor; State: MI; Zip/postal_code: 48105; Country: USA; Web_link: http://www.umich.edu/~retina	ftp://ftp.ncbi.nlm.nih.gov/geo/samples/GSM92nnn/GSM92616/suppl/GSM92616.CEL.gz	45101	1	not.included
10	80127	Nrl-ko-Gfp P10 replicate 1	GSM92617	GSE4051	GPL1261	Public on Feb 28 2006	2006-01-16	2006-01-18	RNA	Gfp+ photoreceptor cells	Mus musculus	Nrl-ko-Gfp, Gfp+ photoreceptor cells	total RNA	Biotin	NA	mRNA was amplified using Nugene kit	Nugene kit protocol	NA	NA	NA	NA	NA	NA	NA	NA	Affymetrix standard	Nrl-ko mice were mated with wt-Gfp mice in which Gfp expression is driven by Nrl promoter. Gfp+ photoreceptors were purified by FACS and RNA was extracted and amplified by Nugene kit.; This is Nrl-ko-Gfp P10 replicate 1.	RMA	Name: Swaroop Anand; Email: swaroop@umich.edu; Phone: 734-615 2246; Department: Ophthalmology & Visual Sciences; Institute: University of Michigan; Address: 1000 Wall St.; City: Ann Arbor; State: MI; Zip/postal_code: 48105; Country: USA; Web_link: http://www.umich.edu/~retina	ftp://ftp.ncbi.nlm.nih.gov/geo/samples/GSM92nnn/GSM92617/suppl/GSM92617.CEL.gz	45101	1	not.included
11	80128	Nrl-ko-Gfp P10 replicate 2	GSM92618	GSE4051	GPL1261	Public on Feb 28 2006	2006-01-16	2006-01-18	RNA	Gfp+ photoreceptor cells	Mus musculus	Nrl-ko-Gfp, Gfp+ photoreceptor cells	total RNA	Biotin	NA	mRNA was amplified using Nugene kit	Nugene kit protocol	NA	NA	NA	NA	NA	NA	NA	NA	Affymetrix standard	Nrl-ko mice were mated with wt-Gfp mice in which Gfp expression is driven by Nrl promoter. Gfp+ photoreceptors were purified by FACS and RNA was extracted and amplified by Nugene kit.; This is Nrl-ko-Gfp P10 replicate 2.	RMA	Name: Swaroop Anand; Email: swaroop@umich.edu; Phone: 734-615 2246; Department: Ophthalmology & Visual Sciences; Institute: University of Michigan; Address: 1000 Wall St.; City: Ann Arbor; State: MI; Zip/postal_code: 48105; Country: USA; Web_link: http://www.umich.edu/~retina	ftp://ftp.ncbi.nlm.nih.gov/geo/samples/GSM92nnn/GSM92618/suppl/GSM92618.CEL.gz	45101	1	not.included
12	80129	Nrl-ko-Gfp P10 replicate 3	GSM92619	GSE4051	GPL1261	Public on Feb 28 2006	2006-01-16	2006-01-18	RNA	Gfp+ photoreceptor cells	Mus musculus	Nrl-ko-Gfp, Gfp+ photoreceptor cells	total RNA	Biotin	NA	mRNA was amplified using Nugene kit	Nugene kit protocol	NA	NA	NA	NA	NA	NA	NA	NA	Affymetrix standard	Nrl-ko mice were mated with wt-Gfp mice in which Gfp expression is driven by Nrl promoter. Gfp+ photoreceptors were purified by FACS and RNA was extracted and amplified by Nugene kit.; This is Nrl-ko-Gfp P10 replicate 3.	RMA	Name: Swaroop Anand; Email: swaroop@umich.edu; Phone: 734-615 2246; Department: Ophthalmology & Visual Sciences; Institute: University of Michigan; Address: 1000 Wall St.; City: Ann Arbor; State: MI; Zip/postal_code: 48105; Country: USA; Web_link: http://www.umich.edu/~retina	ftp://ftp.ncbi.nlm.nih.gov/geo/samples/GSM92nnn/GSM92619/suppl/GSM92619.CEL.gz	45101	1	not.included
13	80130	Nrl-ko-Gfp P10 replicate 4	GSM92620	GSE4051	GPL1261	Public on Feb 28 2006	2006-01-16	2006-01-18	RNA	Gfp+ photoreceptor cells	Mus musculus	Nrl-ko-Gfp, Gfp+ photoreceptor cells	total RNA	Biotin	NA	mRNA was amplified using Nugene kit	Nugene kit protocol	NA	NA	NA	NA	NA	NA	NA	NA	Affymetrix standard	Nrl-ko mice were mated with wt-Gfp mice in which Gfp expression is driven by Nrl promoter. Gfp+ photoreceptors were purified by FACS and RNA was extracted and amplified by Nugene kit.; This is Nrl-ko-Gfp P10 replicate 4.	RMA	Name: Swaroop Anand; Email: swaroop@umich.edu; Phone: 734-615 2246; Department: Ophthalmology & Visual Sciences; Institute: University of Michigan; Address: 1000 Wall St.; City: Ann Arbor; State: MI; Zip/postal_code: 48105; Country: USA; Web_link: http://www.umich.edu/~retina	ftp://ftp.ncbi.nlm.nih.gov/geo/samples/GSM92nnn/GSM92620/suppl/GSM92620.CEL.gz	45101	1	not.included
14	80131	Nrl-ko-Gfp P2 replicate 1	GSM92621	GSE4051	GPL1261	Public on Feb 28 2006	2006-01-16	2006-01-18	RNA	Gfp+ photoreceptor cells	Mus musculus	Nrl-ko-Gfp, Gfp+ photoreceptor cells	total RNA	Biotin	NA	mRNA was amplified using Nugene kit	Nugene kit protocol	NA	NA	NA	NA	NA	NA	NA	NA	Affymetrix standard	Nrl-ko mice were mated with wt-Gfp mice in which Gfp expression is driven by Nrl promoter. Gfp+ photoreceptors were purified by FACS and RNA was extracted and amplified by Nugene kit.; This is Nrl-ko-Gfp P2 replicate 1.	RMA	Name: Swaroop Anand; Email: swaroop@umich.edu; Phone: 734-615 2246; Department: Ophthalmology & Visual Sciences; Institute: University of Michigan; Address: 1000 Wall St.; City: Ann Arbor; State: MI; Zip/postal_code: 48105; Country: USA; Web_link: http://www.umich.edu/~retina	ftp://ftp.ncbi.nlm.nih.gov/geo/samples/GSM92nnn/GSM92621/suppl/GSM92621.CEL.gz	45101	1	not.included
15	80132	Nrl-ko-Gfp P2 replicate 2	GSM92622	GSE4051	GPL1261	Public on Feb 28 2006	2006-01-16	2006-01-18	RNA	Gfp+ photoreceptor cells	Mus musculus	Nrl-ko-Gfp, Gfp+ photoreceptor cells	total RNA	Biotin	NA	mRNA was amplified using Nugene kit	Nugene kit protocol	NA	NA	NA	NA	NA	NA	NA	NA	Affymetrix standard	Nrl-ko mice were mated with wt-Gfp mice in which Gfp expression is driven by Nrl promoter. Gfp+ photoreceptors were purified by FACS and RNA was extracted and amplified by Nugene kit.; ; This is Nrl-ko-Gfp P2 replicate 2.	RMA	Name: Swaroop Anand; Email: swaroop@umich.edu; Phone: 734-615 2246; Department: Ophthalmology & Visual Sciences; Institute: University of Michigan; Address: 1000 Wall St.; City: Ann Arbor; State: MI; Zip/postal_code: 48105; Country: USA; Web_link: http://www.umich.edu/~retina	ftp://ftp.ncbi.nlm.nih.gov/geo/samples/GSM92nnn/GSM92622/suppl/GSM92622.CEL.gz	45101	1	not.included
16	80133	Nrl-ko-Gfp P2 replicate 3	GSM92623	GSE4051	GPL1261	Public on Feb 28 2006	2006-01-16	2006-01-18	RNA	Gfp+ photoreceptor cells	Mus musculus	Nrl-ko-Gfp, Gfp+ photoreceptor cells	total RNA	Biotin	NA	mRNA was amplified using Nugene kit	Nugene kit protocol	NA	NA	NA	NA	NA	NA	NA	NA	Affymetrix standard	Nrl-ko mice were mated with wt-Gfp mice in which Gfp expression is driven by Nrl promoter. Gfp+ photoreceptors were purified by FACS and RNA was extracted and amplified by Nugene kit.; This is Nrl-ko-Gfp P2 replicate 3.	RMA	Name: Swaroop Anand; Email: swaroop@umich.edu; Phone: 734-615 2246; Department: Ophthalmology & Visual Sciences; Institute: University of Michigan; Address: 1000 Wall St.; City: Ann Arbor; State: MI; Zip/postal_code: 48105; Country: USA; Web_link: http://www.umich.edu/~retina	ftp://ftp.ncbi.nlm.nih.gov/geo/samples/GSM92nnn/GSM92623/suppl/GSM92623.CEL.gz	45101	1	not.included
17	80134	Nrl-ko-Gfp P2 replicate 4	GSM92624	GSE4051	GPL1261	Public on Feb 28 2006	2006-01-16	2006-01-18	RNA	Gfp+ photoreceptor cells	Mus musculus	Nrl-ko-Gfp, Gfp+ photoreceptor cells	total RNA	Biotin	NA	mRNA was amplified using Nugene kit	Nugene kit protocol	NA	NA	NA	NA	NA	NA	NA	NA	Affymetrix standard	Nrl-ko mice were mated with wt-Gfp mice in which Gfp expression is driven by Nrl promoter. Gfp+ photoreceptors were purified by FACS and RNA was extracted and amplified by Nugene kit.; ; This is Nrl-ko-Gfp P2 replicate 4.	RMA	Name: Swaroop Anand; Email: swaroop@umich.edu; Phone: 734-615 2246; Department: Ophthalmology & Visual Sciences; Institute: University of Michigan; Address: 1000 Wall St.; City: Ann Arbor; State: MI; Zip/postal_code: 48105; Country: USA; Web_link: http://www.umich.edu/~retina	ftp://ftp.ncbi.nlm.nih.gov/geo/samples/GSM92nnn/GSM92624/suppl/GSM92624.CEL.gz	45101	1	not.included
18	80135	Nrl-ko-Gfp P6 replicate 1	GSM92625	GSE4051	GPL1261	Public on Feb 28 2006	2006-01-16	2006-01-18	RNA	Gfp+ photoreceptor cells	Mus musculus	Nrl-ko-Gfp, Gfp+ photoreceptor cells	total RNA	Biotin	NA	mRNA was amplified using Nugene kit	Nugene kit protocol	NA	NA	NA	NA	NA	NA	NA	NA	Affymetrix standard	Nrl-ko mice were mated with wt-Gfp mice in which Gfp expression is driven by Nrl promoter. Gfp+ photoreceptors were purified by FACS and RNA was extracted and amplified by Nugene kit.; This is Nrl-ko-Gfp P6 replicate 1.	RMA	Name: Swaroop Anand; Email: swaroop@umich.edu; Phone: 734-615 2246; Department: Ophthalmology & Visual Sciences; Institute: University of Michigan; Address: 1000 Wall St.; City: Ann Arbor; State: MI; Zip/postal_code: 48105; Country: USA; Web_link: http://www.umich.edu/~retina	ftp://ftp.ncbi.nlm.nih.gov/geo/samples/GSM92nnn/GSM92625/suppl/GSM92625.CEL.gz	45101	1	not.included
19	80136	Nrl-ko-Gfp P6 replicate 2	GSM92626	GSE4051	GPL1261	Public on Feb 28 2006	2006-01-16	2006-01-18	RNA	Gfp+ photoreceptor cells	Mus musculus	Nrl-ko-Gfp, Gfp+ photoreceptor cells	total RNA	Biotin	NA	mRNA was amplified using Nugene kit	Nugene kit protocol	NA	NA	NA	NA	NA	NA	NA	NA	Affymetrix standard	Nrl-ko mice were mated with wt-Gfp mice in which Gfp expression is driven by Nrl promoter. Gfp+ photoreceptors were purified by FACS and RNA was extracted and amplified by Nugene kit.; ; This is Nrl-ko-Gfp P6 replicate 2.	RMA	Name: Swaroop Anand; Email: swaroop@umich.edu; Phone: 734-615 2246; Department: Ophthalmology & Visual Sciences; Institute: University of Michigan; Address: 1000 Wall St.; City: Ann Arbor; State: MI; Zip/postal_code: 48105; Country: USA; Web_link: http://www.umich.edu/~retina	ftp://ftp.ncbi.nlm.nih.gov/geo/samples/GSM92nnn/GSM92626/suppl/GSM92626.CEL.gz	45101	1	not.included
20	80137	Nrl-ko-Gfp P6 replicate 3	GSM92627	GSE4051	GPL1261	Public on Feb 28 2006	2006-01-16	2006-01-18	RNA	Gfp+ photoreceptor cells	Mus musculus	Nrl-ko-Gfp, Gfp+ photoreceptor cells	total RNA	Biotin	NA	mRNA was amplified using Nugene kit	Nugene kit protocol	NA	NA	NA	NA	NA	NA	NA	NA	Affymetrix standard	Nrl-ko mice were mated with wt-Gfp mice in which Gfp expression is driven by Nrl promoter. Gfp+ photoreceptors were purified by FACS and RNA was extracted and amplified by Nugene kit.; This is Nrl-ko-Gfp P6 replicate 3.	RMA	Name: Swaroop Anand; Email: swaroop@umich.edu; Phone: 734-615 2246; Department: Ophthalmology & Visual Sciences; Institute: University of Michigan; Address: 1000 Wall St.; City: Ann Arbor; State: MI; Zip/postal_code: 48105; Country: USA; Web_link: http://www.umich.edu/~retina	ftp://ftp.ncbi.nlm.nih.gov/geo/samples/GSM92nnn/GSM92627/suppl/GSM92627.CEL.gz	45101	1	not.included
21	80138	Nrl-ko-Gfp P6 replicate 4	GSM92628	GSE4051	GPL1261	Public on Feb 28 2006	2006-01-16	2006-01-18	RNA	Gfp+ photoreceptor cells	Mus musculus	Nrl-ko-Gfp, Gfp+ photoreceptor cells	total RNA	Biotin	NA	mRNA was amplified using Nugene kit	Nugene kit protocol	NA	NA	NA	NA	NA	NA	NA	NA	Affymetrix standard	Nrl-ko mice were mated with wt-Gfp mice in which Gfp expression is driven by Nrl promoter. Gfp+ photoreceptors were purified by FACS and RNA was extracted and amplified by Nugene kit.; This is Nrl-ko-Gfp P6 replicate 4.	RMA	Name: Swaroop Anand; Email: swaroop@umich.edu; Phone: 734-615 2246; Department: Ophthalmology & Visual Sciences; Institute: University of Michigan; Address: 1000 Wall St.; City: Ann Arbor; State: MI; Zip/postal_code: 48105; Country: USA; Web_link: http://www.umich.edu/~retina	ftp://ftp.ncbi.nlm.nih.gov/geo/samples/GSM92nnn/GSM92628/suppl/GSM92628.CEL.gz	45101	1	not.included
22	80139	wt-Gfp 4 weeks replicate 1	GSM92629	GSE4051	GPL1261	Public on Feb 28 2006	2006-01-16	2006-01-18	RNA	Gfp+ photoreceptor cells	Mus musculus	wt-Gfp, Gfp+ photoreceptor cells	total RNA	Biotin	NA	mRNA was amplified using Nugene kit	Nugene kit protocol	NA	NA	NA	NA	NA	NA	NA	NA	Affymetrix standard	Nrl-ko mice were mated with wt-Gfp mice in which Gfp expression is driven by Nrl promoter. Gfp+ photoreceptors were purified by FACS and RNA was extracted and amplified by Nugene kit.; This is wt-Gfp 4 weeks replicate 1.	RMA	Name: Swaroop Anand; Email: swaroop@umich.edu; Phone: 734-615 2246; Department: Ophthalmology & Visual Sciences; Institute: University of Michigan; Address: 1000 Wall St.; City: Ann Arbor; State: MI; Zip/postal_code: 48105; Country: USA; Web_link: http://www.umich.edu/~retina	ftp://ftp.ncbi.nlm.nih.gov/geo/samples/GSM92nnn/GSM92629/suppl/GSM92629.CEL.gz	45101	1	photoreceptors
23	80140	wt-Gfp 4 weeks replicate 2	GSM92630	GSE4051	GPL1261	Public on Feb 28 2006	2006-01-16	2006-01-18	RNA	Gfp+ photoreceptor cells	Mus musculus	wt-Gfp, Gfp+ photoreceptor cells	total RNA	Biotin	NA	mRNA was amplified using Nugene kit	Nugene kit protocol	NA	NA	NA	NA	NA	NA	NA	NA	Affymetrix standard	Nrl-ko mice were mated with wt-Gfp mice in which Gfp expression is driven by Nrl promoter. Gfp+ photoreceptors were purified by FACS and RNA was extracted and amplified by Nugene kit.; This is wt-Gfp 4 weeks replicate 2.	RMA	Name: Swaroop Anand; Email: swaroop@umich.edu; Phone: 734-615 2246; Department: Ophthalmology & Visual Sciences; Institute: University of Michigan; Address: 1000 Wall St.; City: Ann Arbor; State: MI; Zip/postal_code: 48105; Country: USA; Web_link: http://www.umich.edu/~retina	ftp://ftp.ncbi.nlm.nih.gov/geo/samples/GSM92nnn/GSM92630/suppl/GSM92630.CEL.gz	45101	1	photoreceptors
24	80141	wt-Gfp 4 weeks replicate 3	GSM92631	GSE4051	GPL1261	Public on Feb 28 2006	2006-01-16	2006-01-18	RNA	Gfp+ photoreceptor cells	Mus musculus	wt-Gfp, Gfp+ photoreceptor cells	total RNA	Biotin	NA	mRNA was amplified using Nugene kit	Nugene kit protocol	NA	NA	NA	NA	NA	NA	NA	NA	Affymetrix standard	Nrl-ko mice were mated with wt-Gfp mice in which Gfp expression is driven by Nrl promoter. Gfp+ photoreceptors were purified by FACS and RNA was extracted and amplified by Nugene kit.; This is wt-Gfp 4 weeks replicate 3.	RMA	Name: Swaroop Anand; Email: swaroop@umich.edu; Phone: 734-615 2246; Department: Ophthalmology & Visual Sciences; Institute: University of Michigan; Address: 1000 Wall St.; City: Ann Arbor; State: MI; Zip/postal_code: 48105; Country: USA; Web_link: http://www.umich.edu/~retina	ftp://ftp.ncbi.nlm.nih.gov/geo/samples/GSM92nnn/GSM92631/suppl/GSM92631.CEL.gz	45101	1	photoreceptors
25	80142	wt-Gfp 4 weeks replicate 4	GSM92632	GSE4051	GPL1261	Public on Feb 28 2006	2006-01-16	2006-01-18	RNA	Gfp+ photoreceptor cells	Mus musculus	wt-Gfp, Gfp+ photoreceptor cells	total RNA	Biotin	NA	mRNA was amplified using Nugene kit	Nugene kit protocol	NA	NA	NA	NA	NA	NA	NA	NA	Affymetrix standard	Nrl-ko mice were mated with wt-Gfp mice in which Gfp expression is driven by Nrl promoter. Gfp+ photoreceptors were purified by FACS and RNA was extracted and amplified by Nugene kit.; This is wt-Gfp 4 weeks replicate 4.	RMA	Name: Swaroop Anand; Email: swaroop@umich.edu; Phone: 734-615 2246; Department: Ophthalmology & Visual Sciences; Institute: University of Michigan; Address: 1000 Wall St.; City: Ann Arbor; State: MI; Zip/postal_code: 48105; Country: USA; Web_link: http://www.umich.edu/~retina	ftp://ftp.ncbi.nlm.nih.gov/geo/samples/GSM92nnn/GSM92632/suppl/GSM92632.CEL.gz	45101	1	photoreceptors
26	80143	wt-Gfp E16 replicate 1	GSM92633	GSE4051	GPL1261	Public on Feb 28 2006	2006-01-16	2006-01-18	RNA	Gfp+ photoreceptor cells	Mus musculus	wt-Gfp, Gfp+ photoreceptor cells	total RNA	Biotin	NA	mRNA was amplified using Nugene kit	Nugene kit protocol	NA	NA	NA	NA	NA	NA	NA	NA	Affymetrix standard	Nrl-ko mice were mated with wt-Gfp mice in which Gfp expression is driven by Nrl promoter. Gfp+ photoreceptors were purified by FACS and RNA was extracted and amplified by Nugene kit.; This is wt-Gfp E16 replicate 1.	RMA	Name: Swaroop Anand; Email: swaroop@umich.edu; Phone: 734-615 2246; Department: Ophthalmology & Visual Sciences; Institute: University of Michigan; Address: 1000 Wall St.; City: Ann Arbor; State: MI; Zip/postal_code: 48105; Country: USA; Web_link: http://www.umich.edu/~retina	ftp://ftp.ncbi.nlm.nih.gov/geo/samples/GSM92nnn/GSM92633/suppl/GSM92633.CEL.gz	45101	1	not.included
27	80144	wt-Gfp E16 replicate 2	GSM92634	GSE4051	GPL1261	Public on Feb 28 2006	2006-01-16	2006-01-18	RNA	Gfp+ photoreceptor cells	Mus musculus	wt-Gfp, Gfp+ photoreceptor cells	total RNA	Biotin	NA	mRNA was amplified using Nugene kit	Nugene kit protocol	NA	NA	NA	NA	NA	NA	NA	NA	Affymetrix standard	Nrl-ko mice were mated with wt-Gfp mice in which Gfp expression is driven by Nrl promoter. Gfp+ photoreceptors were purified by FACS and RNA was extracted and amplified by Nugene kit.; This is wt-Gfp E16 replicate 2.	RMA	Name: Swaroop Anand; Email: swaroop@umich.edu; Phone: 734-615 2246; Department: Ophthalmology & Visual Sciences; Institute: University of Michigan; Address: 1000 Wall St.; City: Ann Arbor; State: MI; Zip/postal_code: 48105; Country: USA; Web_link: http://www.umich.edu/~retina	ftp://ftp.ncbi.nlm.nih.gov/geo/samples/GSM92nnn/GSM92634/suppl/GSM92634.CEL.gz	45101	1	not.included
28	80145	wt-Gfp E16 replicate 3	GSM92635	GSE4051	GPL1261	Public on Feb 28 2006	2006-01-16	2006-01-18	RNA	Gfp+ photoreceptor cells	Mus musculus	wt-Gfp, Gfp+ photoreceptor cells	total RNA	Biotin	NA	mRNA was amplified using Nugene kit	Nugene kit protocol	NA	NA	NA	NA	NA	NA	NA	NA	Affymetrix standard	Nrl-ko mice were mated with wt-Gfp mice in which Gfp expression is driven by Nrl promoter. Gfp+ photoreceptors were purified by FACS and RNA was extracted and amplified by Nugene kit.; This is wt-Gfp E16 replicate 3.	RMA	Name: Swaroop Anand; Email: swaroop@umich.edu; Phone: 734-615 2246; Department: Ophthalmology & Visual Sciences; Institute: University of Michigan; Address: 1000 Wall St.; City: Ann Arbor; State: MI; Zip/postal_code: 48105; Country: USA; Web_link: http://www.umich.edu/~retina	ftp://ftp.ncbi.nlm.nih.gov/geo/samples/GSM92nnn/GSM92635/suppl/GSM92635.CEL.gz	45101	1	not.included
29	80146	wt-Gfp E16 replicate 4	GSM92636	GSE4051	GPL1261	Public on Feb 28 2006	2006-01-16	2006-01-18	RNA	Gfp+ photoreceptor cells	Mus musculus	wt-Gfp, Gfp+ photoreceptor cells	total RNA	Biotin	NA	mRNA was amplified using Nugene kit	Nugene kit protocol	NA	NA	NA	NA	NA	NA	NA	NA	Affymetrix standard	Nrl-ko mice were mated with wt-Gfp mice in which Gfp expression is driven by Nrl promoter. Gfp+ photoreceptors were purified by FACS and RNA was extracted and amplified by Nugene kit.; This is wt-Gfp E16 replicate 4.	RMA	Name: Swaroop Anand; Email: swaroop@umich.edu; Phone: 734-615 2246; Department: Ophthalmology & Visual Sciences; Institute: University of Michigan; Address: 1000 Wall St.; City: Ann Arbor; State: MI; Zip/postal_code: 48105; Country: USA; Web_link: http://www.umich.edu/~retina	ftp://ftp.ncbi.nlm.nih.gov/geo/samples/GSM92nnn/GSM92636/suppl/GSM92636.CEL.gz	45101	1	not.included
30	80147	wt-Gfp P10 replicate 1	GSM92637	GSE4051	GPL1261	Public on Feb 28 2006	2006-01-16	2006-01-18	RNA	Gfp+ photoreceptor cells	Mus musculus	wt-Gfp, Gfp+ photoreceptor cells	total RNA	Biotin	NA	mRNA was amplified using Nugene kit	Nugene kit protocol	NA	NA	NA	NA	NA	NA	NA	NA	Affymetrix standard	Nrl-ko mice were mated with wt-Gfp mice in which Gfp expression is driven by Nrl promoter. Gfp+ photoreceptors were purified by FACS and RNA was extracted and amplified by Nugene kit.; This is wt-Gfp P10 replicate 1.	RMA	Name: Swaroop Anand; Email: swaroop@umich.edu; Phone: 734-615 2246; Department: Ophthalmology & Visual Sciences; Institute: University of Michigan; Address: 1000 Wall St.; City: Ann Arbor; State: MI; Zip/postal_code: 48105; Country: USA; Web_link: http://www.umich.edu/~retina	ftp://ftp.ncbi.nlm.nih.gov/geo/samples/GSM92nnn/GSM92637/suppl/GSM92637.CEL.gz	45101	1	photoreceptors
31	80148	wt-Gfp P10 replicate 2	GSM92638	GSE4051	GPL1261	Public on Feb 28 2006	2006-01-16	2006-01-18	RNA	Gfp+ photoreceptor cells	Mus musculus	wt-Gfp, Gfp+ photoreceptor cells	total RNA	Biotin	NA	mRNA was amplified using Nugene kit	Nugene kit protocol	NA	NA	NA	NA	NA	NA	NA	NA	Affymetrix standard	Nrl-ko mice were mated with wt-Gfp mice in which Gfp expression is driven by Nrl promoter. Gfp+ photoreceptors were purified by FACS and RNA was extracted and amplified by Nugene kit.; This is wt-Gfp P10 replicate 2.	RMA	Name: Swaroop Anand; Email: swaroop@umich.edu; Phone: 734-615 2246; Department: Ophthalmology & Visual Sciences; Institute: University of Michigan; Address: 1000 Wall St.; City: Ann Arbor; State: MI; Zip/postal_code: 48105; Country: USA; Web_link: http://www.umich.edu/~retina	ftp://ftp.ncbi.nlm.nih.gov/geo/samples/GSM92nnn/GSM92638/suppl/GSM92638.CEL.gz	45101	1	photoreceptors
32	80149	wt-Gfp P10 replicate 3	GSM92639	GSE4051	GPL1261	Public on Feb 28 2006	2006-01-16	2006-01-18	RNA	Gfp+ photoreceptor cells	Mus musculus	wt-Gfp, Gfp+ photoreceptor cells	total RNA	Biotin	NA	mRNA was amplified using Nugene kit	Nugene kit protocol	NA	NA	NA	NA	NA	NA	NA	NA	Affymetrix standard	Nrl-ko mice were mated with wt-Gfp mice in which Gfp expression is driven by Nrl promoter. Gfp+ photoreceptors were purified by FACS and RNA was extracted and amplified by Nugene kit.; This is wt-Gfp P10 replicate 3.	RMA	Name: Swaroop Anand; Email: swaroop@umich.edu; Phone: 734-615 2246; Department: Ophthalmology & Visual Sciences; Institute: University of Michigan; Address: 1000 Wall St.; City: Ann Arbor; State: MI; Zip/postal_code: 48105; Country: USA; Web_link: http://www.umich.edu/~retina	ftp://ftp.ncbi.nlm.nih.gov/geo/samples/GSM92nnn/GSM92639/suppl/GSM92639.CEL.gz	45101	1	photoreceptors
33	80150	wt-Gfp P10 replicate 4	GSM92640	GSE4051	GPL1261	Public on Feb 28 2006	2006-01-16	2006-01-18	RNA	Gfp+ photoreceptor cells	Mus musculus	wt-Gfp, Gfp+ photoreceptor cells	total RNA	Biotin	NA	mRNA was amplified using Nugene kit	Nugene kit protocol	NA	NA	NA	NA	NA	NA	NA	NA	Affymetrix standard	Nrl-ko mice were mated with wt-Gfp mice in which Gfp expression is driven by Nrl promoter. Gfp+ photoreceptors were purified by FACS and RNA was extracted and amplified by Nugene kit.; This is wt-Gfp P10 replicate 4.	RMA	Name: Swaroop Anand; Email: swaroop@umich.edu; Phone: 734-615 2246; Department: Ophthalmology & Visual Sciences; Institute: University of Michigan; Address: 1000 Wall St.; City: Ann Arbor; State: MI; Zip/postal_code: 48105; Country: USA; Web_link: http://www.umich.edu/~retina	ftp://ftp.ncbi.nlm.nih.gov/geo/samples/GSM92nnn/GSM92640/suppl/GSM92640.CEL.gz	45101	1	photoreceptors
34	80151	wt-Gfp P2 replicate 1	GSM92641	GSE4051	GPL1261	Public on Feb 28 2006	2006-01-16	2006-01-18	RNA	Gfp+ photoreceptor cells	Mus musculus	wt-Gfp, Gfp+ photoreceptor cells	total RNA	Biotin	NA	mRNA was amplified using Nugene kit	Nugene kit protocol	NA	NA	NA	NA	NA	NA	NA	NA	Affymetrix standard	Nrl-ko mice were mated with wt-Gfp mice in which Gfp expression is driven by Nrl promoter. Gfp+ photoreceptors were purified by FACS and RNA was extracted and amplified by Nugene kit.; This is wt-Gfp P2 replicate 1.	RMA	Name: Swaroop Anand; Email: swaroop@umich.edu; Phone: 734-615 2246; Department: Ophthalmology & Visual Sciences; Institute: University of Michigan; Address: 1000 Wall St.; City: Ann Arbor; State: MI; Zip/postal_code: 48105; Country: USA; Web_link: http://www.umich.edu/~retina	ftp://ftp.ncbi.nlm.nih.gov/geo/samples/GSM92nnn/GSM92641/suppl/GSM92641.CEL.gz	45101	1	photoreceptors
35	80152	wt-Gfp P2 replicate 2	GSM92642	GSE4051	GPL1261	Public on Feb 28 2006	2006-01-16	2006-01-18	RNA	Gfp+ photoreceptor cells	Mus musculus	wt-Gfp, Gfp+ photoreceptor cells	total RNA	Biotin	NA	mRNA was amplified using Nugene kit	Nugene kit protocol	NA	NA	NA	NA	NA	NA	NA	NA	Affymetrix standard	Nrl-ko mice were mated with wt-Gfp mice in which Gfp expression is driven by Nrl promoter. Gfp+ photoreceptors were purified by FACS and RNA was extracted and amplified by Nugene kit.; This is wt-Gfp P2 replicate 2.	RMA	Name: Swaroop Anand; Email: swaroop@umich.edu; Phone: 734-615 2246; Department: Ophthalmology & Visual Sciences; Institute: University of Michigan; Address: 1000 Wall St.; City: Ann Arbor; State: MI; Zip/postal_code: 48105; Country: USA; Web_link: http://www.umich.edu/~retina	ftp://ftp.ncbi.nlm.nih.gov/geo/samples/GSM92nnn/GSM92642/suppl/GSM92642.CEL.gz	45101	1	photoreceptors
36	80153	wt-Gfp P2 replicate 3	GSM92643	GSE4051	GPL1261	Public on Feb 28 2006	2006-01-16	2006-01-18	RNA	Gfp+ photoreceptor cells	Mus musculus	wt-Gfp, Gfp+ photoreceptor cells	total RNA	Biotin	NA	mRNA was amplified using Nugene kit	Nugene kit protocol	NA	NA	NA	NA	NA	NA	NA	NA	Affymetrix standard	Nrl-ko mice were mated with wt-Gfp mice in which Gfp expression is driven by Nrl promoter. Gfp+ photoreceptors were purified by FACS and RNA was extracted and amplified by Nugene kit.; This is wt-Gfp P2 replicate 3.	RMA	Name: Swaroop Anand; Email: swaroop@umich.edu; Phone: 734-615 2246; Department: Ophthalmology & Visual Sciences; Institute: University of Michigan; Address: 1000 Wall St.; City: Ann Arbor; State: MI; Zip/postal_code: 48105; Country: USA; Web_link: http://www.umich.edu/~retina	ftp://ftp.ncbi.nlm.nih.gov/geo/samples/GSM92nnn/GSM92643/suppl/GSM92643.CEL.gz	45101	1	photoreceptors
37	80154	wt-Gfp P2 replicate 4	GSM92644	GSE4051	GPL1261	Public on Feb 28 2006	2006-01-16	2008-09-10	RNA	Gfp+ photoreceptor cells	Mus musculus	wt-Gfp, Gfp+ photoreceptor cells	total RNA	Biotin	NA	mRNA was amplified using Nugene kit	Nugene kit protocol	NA	NA	NA	NA	NA	NA	NA	NA	Affymetrix standard	Nrl-ko mice were mated with wt-Gfp mice in which Gfp expression is driven by Nrl promoter. Gfp+ photoreceptors were purified by FACS and RNA was extracted and amplified by Nugene kit.; This is wt-Gfp P2 replicate 4.	RMA	Name: Swaroop Anand; Email: swaroop@umich.edu; Phone: 734-615 2246; Department: Ophthalmology & Visual Sciences; Institute: University of Michigan; Address: 1000 Wall St.; City: Ann Arbor; State: MI; Zip/postal_code: 48105; Country: USA; Web_link: http://www.umich.edu/~retina	ftp://ftp.ncbi.nlm.nih.gov/geo/samples/GSM92nnn/GSM92644/suppl/GSM92644.CEL.gz	45101	1	photoreceptors
38	80155	wt-Gfp P6 replicate 1	GSM92645	GSE4051	GPL1261	Public on Feb 28 2006	2006-01-16	2006-01-18	RNA	Gfp+ photoreceptor cells	Mus musculus	wt-Gfp, Gfp+ photoreceptor cells	total RNA	Biotin	NA	mRNA was amplified using Nugene kit	Nugene kit protocol	NA	NA	NA	NA	NA	NA	NA	NA	Affymetrix standard	Nrl-ko mice were mated with wt-Gfp mice in which Gfp expression is driven by Nrl promoter. Gfp+ photoreceptors were purified by FACS and RNA was extracted and amplified by Nugene kit.; This is wt-Gfp P6 replicate 1.	RMA	Name: Swaroop Anand; Email: swaroop@umich.edu; Phone: 734-615 2246; Department: Ophthalmology & Visual Sciences; Institute: University of Michigan; Address: 1000 Wall St.; City: Ann Arbor; State: MI; Zip/postal_code: 48105; Country: USA; Web_link: http://www.umich.edu/~retina	ftp://ftp.ncbi.nlm.nih.gov/geo/samples/GSM92nnn/GSM92645/suppl/GSM92645.CEL.gz	45101	1	photoreceptors
39	80156	wt-Gfp P6 replicate 2	GSM92646	GSE4051	GPL1261	Public on Feb 28 2006	2006-01-16	2006-01-18	RNA	Gfp+ photoreceptor cells	Mus musculus	wt-Gfp, Gfp+ photoreceptor cells	total RNA	Biotin	NA	mRNA was amplified using Nugene kit	Nugene kit protocol	NA	NA	NA	NA	NA	NA	NA	NA	Affymetrix standard	Nrl-ko mice were mated with wt-Gfp mice in which Gfp expression is driven by Nrl promoter. Gfp+ photoreceptors were purified by FACS and RNA was extracted and amplified by Nugene kit.; This is wt-Gfp P6 replicate 2.	RMA	Name: Swaroop Anand; Email: swaroop@umich.edu; Phone: 734-615 2246; Department: Ophthalmology & Visual Sciences; Institute: University of Michigan; Address: 1000 Wall St.; City: Ann Arbor; State: MI; Zip/postal_code: 48105; Country: USA; Web_link: http://www.umich.edu/~retina	ftp://ftp.ncbi.nlm.nih.gov/geo/samples/GSM92nnn/GSM92646/suppl/GSM92646.CEL.gz	45101	1	photoreceptors
40	80157	wt-Gfp P6 replicate 3	GSM92647	GSE4051	GPL1261	Public on Feb 28 2006	2006-01-16	2006-01-18	RNA	Gfp+ photoreceptor cells	Mus musculus	wt-Gfp, Gfp+ photoreceptor cells	total RNA	Biotin	NA	mRNA was amplified using Nugene kit	Nugene kit protocol	NA	NA	NA	NA	NA	NA	NA	NA	Affymetrix standard	Nrl-ko mice were mated with wt-Gfp mice in which Gfp expression is driven by Nrl promoter. Gfp+ photoreceptors were purified by FACS and RNA was extracted and amplified by Nugene kit.; This is wt-Gfp P6 replicate 3.	RMA	Name: Swaroop Anand; Email: swaroop@umich.edu; Phone: 734-615 2246; Department: Ophthalmology & Visual Sciences; Institute: University of Michigan; Address: 1000 Wall St.; City: Ann Arbor; State: MI; Zip/postal_code: 48105; Country: USA; Web_link: http://www.umich.edu/~retina	ftp://ftp.ncbi.nlm.nih.gov/geo/samples/GSM92nnn/GSM92647/suppl/GSM92647.CEL.gz	45101	1	photoreceptors
41	80158	wt-Gfp P6 replicate 4	GSM92648	GSE4051	GPL1261	Public on Feb 28 2006	2006-01-16	2006-01-18	RNA	Gfp+ photoreceptor cells	Mus musculus	wt-Gfp, Gfp+ photoreceptor cells	total RNA	Biotin	NA	mRNA was amplified using Nugene kit	Nugene kit protocol	NA	NA	NA	NA	NA	NA	NA	NA	Affymetrix standard	Nrl-ko mice were mated with wt-Gfp mice in which Gfp expression is driven by Nrl promoter. Gfp+ photoreceptors were purified by FACS and RNA was extracted and amplified by Nugene kit.; This is wt-Gfp P6 replicate 4.	RMA	Name: Swaroop Anand; Email: swaroop@umich.edu; Phone: 734-615 2246; Department: Ophthalmology & Visual Sciences; Institute: University of Michigan; Address: 1000 Wall St.; City: Ann Arbor; State: MI; Zip/postal_code: 48105; Country: USA; Web_link: http://www.umich.edu/~retina	ftp://ftp.ncbi.nlm.nih.gov/geo/samples/GSM92nnn/GSM92648/suppl/GSM92648.CEL.gz	45101	1	photoreceptors
42	93151	eye, retina: Ret-C1-ENZO	GSM107514	GSE4756	GPL1261	Public on May 02 2006	2006-05-01	2013-05-22	RNA	eye, retina	Mus musculus	NA	total RNA	NA	NA	NA	NA	NA	NA	NA	NA	NA	NA	NA	NA	NA	RNA extracted from a fresh disected retina.; Treatment, type=timepoint, measurement=0.0 d	NA	Name: Winnie Liang; Institute: Translational Genomics; Address: 445 N. Fifth Street; City: Phoenix; State: AZ; Zip/postal_code: 85012; Country: USA	ftp://ftp.ncbi.nlm.nih.gov/geo/samples/GSM107nnn/GSM107514/suppl/GSM107514.cel.gz	45101	1	whole.retina
43	93152	eye, retina: RetExp-1-ENZO	GSM107515	GSE4756	GPL1261	Public on May 02 2006	2006-05-01	2013-05-22	RNA	eye, retina	Mus musculus	NA	total RNA	NA	NA	NA	NA	NA	NA	NA	NA	NA	NA	NA	NA	NA	RNA extracted from injected retina; Treatment, type=compound_based_treatment	NA	Name: Winnie Liang; Institute: Translational Genomics; Address: 445 N. Fifth Street; City: Phoenix; State: AZ; Zip/postal_code: 85012; Country: USA	ftp://ftp.ncbi.nlm.nih.gov/geo/samples/GSM107nnn/GSM107515/suppl/GSM107515.cel.gz	45101	1	not.included
44	93153	eye, retina: Ret-C2-ENZO	GSM107516	GSE4756	GPL1261	Public on May 02 2006	2006-05-01	2013-05-22	RNA	eye, retina	Mus musculus	NA	total RNA	NA	NA	NA	NA	NA	NA	NA	NA	NA	NA	NA	NA	NA	RNA extracted from fresh retina; Treatment, type=timepoint, measurement=0.0 d	NA	Name: Winnie Liang; Institute: Translational Genomics; Address: 445 N. Fifth Street; City: Phoenix; State: AZ; Zip/postal_code: 85012; Country: USA	ftp://ftp.ncbi.nlm.nih.gov/geo/samples/GSM107nnn/GSM107516/suppl/GSM107516.cel.gz	45101	1	whole.retina
45	93154	eye, retina: Ret-C3-ENZO	GSM107517	GSE4756	GPL1261	Public on May 02 2006	2006-05-01	2013-05-22	RNA	eye, retina	Mus musculus	NA	total RNA	NA	NA	NA	NA	NA	NA	NA	NA	NA	NA	NA	NA	NA	RNA extracted from fresh retina; Treatment, type=timepoint, measurement=0.0 d	NA	Name: Winnie Liang; Institute: Translational Genomics; Address: 445 N. Fifth Street; City: Phoenix; State: AZ; Zip/postal_code: 85012; Country: USA	ftp://ftp.ncbi.nlm.nih.gov/geo/samples/GSM107nnn/GSM107517/suppl/GSM107517.cel.gz	45101	1	whole.retina
46	93155	eye, retina: Ret-C4-ENZO	GSM107518	GSE4756	GPL1261	Public on May 02 2006	2006-05-01	2013-05-22	RNA	eye, retina	Mus musculus	NA	total RNA	NA	NA	NA	NA	NA	NA	NA	NA	NA	NA	NA	NA	NA	RNA ectracted from a fresh retina; Treatment, type=timepoint, measurement=0.0 d	NA	Name: Winnie Liang; Institute: Translational Genomics; Address: 445 N. Fifth Street; City: Phoenix; State: AZ; Zip/postal_code: 85012; Country: USA	ftp://ftp.ncbi.nlm.nih.gov/geo/samples/GSM107nnn/GSM107518/suppl/GSM107518.cel.gz	45101	1	whole.retina
47	93156	eye, retina: Ret-Exp-2-ENZO	GSM107519	GSE4756	GPL1261	Public on May 02 2006	2006-05-01	2013-05-22	RNA	eye, retina	Mus musculus	NA	total RNA	NA	NA	NA	NA	NA	NA	NA	NA	NA	NA	NA	NA	NA	RNA extracted from injected retina; Treatment, type=compound_based_treatment	NA	Name: Winnie Liang; Institute: Translational Genomics; Address: 445 N. Fifth Street; City: Phoenix; State: AZ; Zip/postal_code: 85012; Country: USA	ftp://ftp.ncbi.nlm.nih.gov/geo/samples/GSM107nnn/GSM107519/suppl/GSM107519.cel.gz	45101	1	not.included
48	93157	eye, retina: Ret Exp-3-ENZO	GSM107520	GSE4756	GPL1261	Public on May 02 2006	2006-05-01	2013-05-22	RNA	eye, retina	Mus musculus	NA	total RNA	NA	NA	NA	NA	NA	NA	NA	NA	NA	NA	NA	NA	NA	RNA extracted from injected retina; Treatment, type=compound_based_treatment	NA	Name: Winnie Liang; Institute: Translational Genomics; Address: 445 N. Fifth Street; City: Phoenix; State: AZ; Zip/postal_code: 85012; Country: USA	ftp://ftp.ncbi.nlm.nih.gov/geo/samples/GSM107nnn/GSM107520/suppl/GSM107520.cel.gz	45101	1	not.included
49	93158	eye, retina: Ret Exp-4-ENZO	GSM107521	GSE4756	GPL1261	Public on May 02 2006	2006-05-01	2013-05-22	RNA	eye, retina	Mus musculus	NA	total RNA	NA	NA	NA	NA	NA	NA	NA	NA	NA	NA	NA	NA	NA	RNA extracted from injected retina; Treatment, type=compound_based_treatment	NA	Name: Winnie Liang; Institute: Translational Genomics; Address: 445 N. Fifth Street; City: Phoenix; State: AZ; Zip/postal_code: 85012; Country: USA	ftp://ftp.ncbi.nlm.nih.gov/geo/samples/GSM107nnn/GSM107521/suppl/GSM107521.cel.gz	45101	1	not.included
50	216924	Retinal pigment epithelium (RPE)	GSM239614	GSE9428	GPL1261	Public on Oct 24 2008	2007-10-25	2011-08-14	RNA	Primary cultured cells of retinal pigment epithelium	Mus musculus	Retinal pigment epithelium (Primary cultured cell)	total RNA	biotin	NA	Total RNA was isolated using TRIZOL Reagent(Invitrogen) and used as starting material for the cDNA preparation. RNA was purified from total cellular RNA by Nucleospin RNA II (Macherey-Nagel, Inc, Germany) as outlined by the manufacturer. Integrity of total RNA was assessed qualitatively on the Agilent 2100 Bioanalizer (Agilent Technologies).	1 micro gram of total RNA was reverse transcribed using the cDNA synthesis system of MessageAmp aRNA Kit (Ambion). The oligonucleotide used for priming was 5'-ggccagtgaattgtaatacgactcactatagggaggcgg-(t)24-3. Double-stranded cDNA was cleaned by phenol:chloroform extraction and the aqueous phase removed by centrifugation through Phase-lock Gel (Eppendorf). In vitro transcription was performed using…	NA	NA	NA	NA	NA	NA	NA	NA	10 migro grams of fragmented cRNA were hybridised (45 degrees Celsius, 16 hours). Hybridization was controled adding cRNA cocktail (BioC, BioD, Cre) mixed as described in previous versions of the Expression Analysis Technical Manual. Washing and staining was performed in a Fluidics Station 450 (Affymetrix) using the protocol EukGE-WS2v5.	Primary cultures of pigmented epithelial cells from retinal PE (RPE) cells were cultured in DMEM complete medium, composed of DMEM and 20% FBS for two weeks. The medium of ocular PE was changed to serum free medium, with a cellular RNA extraction then performed after an overnight culture. The RPE were also found to be 95% cytokeratin positive after 14 days of incubation.	The data analysis were performed using the Affymetrix GeneChip Operating Software v1.3. using Affymetrix default analysis settings and global scaling as normalization method. The trimmed mean target intensity of array was arbitrarily set to 100.	Name: Yuri Futagami; Department: Ophthalmology; Institute: Tokyo Medical and Dental University; Address: 1-5-45 Yushima Bunkyoku; City: Tokyo; Zip/postal_code: 113-8519; Country: Japan	ftp://ftp.ncbi.nlm.nih.gov/geo/samples/GSM239nnn/GSM239614/suppl/GSM239614.CEL.gz	45101	1	RPE
51	216925	Retinal pigment epithelium with INFg stimulation	GSM239615	GSE9428	GPL1261	Public on Oct 24 2008	2007-10-25	2011-08-14	RNA	Primary cultured cells of retinal pigment epithelium	Mus musculus	Retinal pigment epithelium stimulated by IFNg	total RNA	biotin	NA	Total RNA was isolated using TRIZOL Reagent(Invitrogen) and used as starting material for the cDNA preparation. RNA was purified from total cellular RNA by Nucleospin RNA II (Macherey-Nagel, Inc, Germany) as outlined by the manufacturer. Integrity of total RNA was assessed qualitatively on the Agilent 2100 Bioanalizer (Agilent Technologies).	1 micro gram of total RNA was reverse transcribed using the cDNA synthesis system of MessageAmp aRNA Kit (Ambion). The oligonucleotide used for priming was 5'-ggccagtgaattgtaatacgactcactatagggaggcgg-(t)24-3. Double-stranded cDNA was cleaned by phenol:chloroform extraction and the aqueous phase removed by centrifugation through Phase-lock Gel (Eppendorf). In vitro transcription was performed using…	NA	NA	NA	NA	NA	NA	NA	NA	10 migro grams of fragmented cRNA were hybridised (45 degrees Celsius, 16 hours). Hybridization was controled adding cRNA cocktail (BioC, BioD, Cre) mixed as described in previous versions of the Expression Analysis Technical Manual. Washing and staining was performed in a Fluidics Station 450 (Affymetrix) using the protocol EukGE-WS2v5.	Primary cultures of pigmented epithelial cells from retinal PE (RPE) cells were cultured in DMEM complete medium, composed of DMEM and 20% FBS for two weeks. RPE cells were stimulated with IFNg (final 100 U/ml) for 24hrs. The medium of ocular PE was changed to serum free medium, with a cellular RNA extraction then performed after an overnight culture. The RPE were also found to be 95% cytokeratin…	The data analysis were performed using the Affymetrix GeneChip Operating Software v1.3. using Affymetrix default analysis settings and global scaling as normalization method. The trimmed mean target intensity of array was arbitrarily set to 100.	Name: Yuri Futagami; Department: Ophthalmology; Institute: Tokyo Medical and Dental University; Address: 1-5-45 Yushima Bunkyoku; City: Tokyo; Zip/postal_code: 113-8519; Country: Japan	ftp://ftp.ncbi.nlm.nih.gov/geo/samples/GSM239nnn/GSM239615/suppl/GSM239615.CEL.gz	45101	1	not.included
52	252519	RPE/choroid_young_rep1	GSM277616	GSE10965	GPL1261	Public on Mar 29 2008	2008-03-26	2008-03-28	RNA	young retinal pigmental epithelium/choroid	Mus musculus	Strain:C57BL/6, Gender: male, Age: 4 months, Tissue: retinal pigmental epithelium/choroid	total RNA	biotin	NA	Total RNA was extracted by using RNeasy Minikit from Qiagen.	standard Affymetrix labeling	NA	NA	NA	NA	NA	NA	NA	NA	standard Affymetrix hybridization	N/A	Based on the affymetrix .cel files, invariant set normalization was performed using dchip2006 and PM-only model was used for generating gene signal intensities.	Name: Huiyi Chen; Email: huiyi-chen@northwestern.edu; Department: Ophthalmology; Institute: Northwestern University School of Medicine ; Address: 303 E Chicago Ave, Tarry 13-752; City: Chicago; State: IL; Zip/postal_code: 60611; Country: USA	ftp://ftp.ncbi.nlm.nih.gov/geo/samples/GSM277nnn/GSM277616/suppl/GSM277616.CEL.gz; ftp://ftp.ncbi.nlm.nih.gov/geo/samples/GSM277nnn/GSM277616/suppl/GSM277616.CHP.gz	45101	1	RPE
53	252548	RPE/choroid_young_rep2	GSM277650	GSE10965	GPL1261	Public on Mar 29 2008	2008-03-27	2008-03-28	RNA	young retinal pigmental epithelium/choroid	Mus musculus	Strain:C57BL/6, Gender: male, Age: 4 months, Tissue: retinal pigmental epithelium/choroid	total RNA	biotin	NA	Total RNA was extracted by using RNeasy Minikit from Qiagen.	standard Affymetrix labeling	NA	NA	NA	NA	NA	NA	NA	NA	standard Affymetrix hybridization	N/A	Based on the affymetrix .cel files, invariant set normalization was performed using dchip2006 and PM-only model was used for generating gene signal intensities.	Name: Huiyi Chen; Email: huiyi-chen@northwestern.edu; Department: Ophthalmology; Institute: Northwestern University School of Medicine ; Address: 303 E Chicago Ave, Tarry 13-752; City: Chicago; State: IL; Zip/postal_code: 60611; Country: USA	ftp://ftp.ncbi.nlm.nih.gov/geo/samples/GSM277nnn/GSM277650/suppl/GSM277650.CEL.gz; ftp://ftp.ncbi.nlm.nih.gov/geo/samples/GSM277nnn/GSM277650/suppl/GSM277650.CHP.gz	45101	1	RPE
54	252549	RPE/choroid_young_rep3	GSM277651	GSE10965	GPL1261	Public on Mar 29 2008	2008-03-27	2008-03-28	RNA	young retinal pigmental epithelium/choroid	Mus musculus	Strain:C57BL/6, Gender: male, Age: 4 months, Tissue: retinal pigmental epithelium/choroid	total RNA	biotin	NA	Total RNA was extracted by using RNeasy Minikit from Qiagen.	standard Affymetrix labeling	NA	NA	NA	NA	NA	NA	NA	NA	standard Affymetrix hybridization	N/A	Based on the affymetrix .cel files, invariant set normalization was performed using dchip2006 and PM-only model was used for generating gene signal intensities.	Name: Huiyi Chen; Email: huiyi-chen@northwestern.edu; Department: Ophthalmology; Institute: Northwestern University School of Medicine ; Address: 303 E Chicago Ave, Tarry 13-752; City: Chicago; State: IL; Zip/postal_code: 60611; Country: USA	ftp://ftp.ncbi.nlm.nih.gov/geo/samples/GSM277nnn/GSM277651/suppl/GSM277651.CEL.gz; ftp://ftp.ncbi.nlm.nih.gov/geo/samples/GSM277nnn/GSM277651/suppl/GSM277651.CHP.gz	45101	1	RPE
55	252550	RPE/choroid_young_rep4	GSM277652	GSE10965	GPL1261	Public on Mar 29 2008	2008-03-27	2008-03-28	RNA	young retinal pigmental epithelium/choroid	Mus musculus	Strain:C57BL/6, Gender: male, Age: 4 months, Tissue: retinal pigmental epithelium/choroid	total RNA	biotin	NA	Total RNA was extracted by using RNeasy Minikit from Qiagen.	standard Affymetrix labeling	NA	NA	NA	NA	NA	NA	NA	NA	standard Affymetrix hybridization	N/A	Based on the affymetrix .cel files, invariant set normalization was performed using dchip2006 and PM-only model was used for generating gene signal intensities.	Name: Huiyi Chen; Email: huiyi-chen@northwestern.edu; Department: Ophthalmology; Institute: Northwestern University School of Medicine ; Address: 303 E Chicago Ave, Tarry 13-752; City: Chicago; State: IL; Zip/postal_code: 60611; Country: USA	ftp://ftp.ncbi.nlm.nih.gov/geo/samples/GSM277nnn/GSM277652/suppl/GSM277652.CEL.gz; ftp://ftp.ncbi.nlm.nih.gov/geo/samples/GSM277nnn/GSM277652/suppl/GSM277652.CHP.gz	45101	1	RPE
56	252571	RPE/choroid_old_rep1	GSM277673	GSE10965	GPL1261	Public on Mar 29 2008	2008-03-27	2008-03-28	RNA	old retinal pigmental epithelium/choroid	Mus musculus	Strain:C57BL/6, Gender: male, Age: 26 months, Tissue: retinal pigmental epithelium/choroid	total RNA	biotin	NA	Total RNA was extracted by using RNeasy Minikit from Qiagen.	standard Affymetrix labeling	NA	NA	NA	NA	NA	NA	NA	NA	standard Affymetrix hybridization	N/A	Based on the affymetrix .cel files, invariant set normalization was performed using dchip2006 and PM-only model was used for generating gene signal intensities.	Name: Huiyi Chen; Email: huiyi-chen@northwestern.edu; Department: Ophthalmology; Institute: Northwestern University School of Medicine ; Address: 303 E Chicago Ave, Tarry 13-752; City: Chicago; State: IL; Zip/postal_code: 60611; Country: USA	ftp://ftp.ncbi.nlm.nih.gov/geo/samples/GSM277nnn/GSM277673/suppl/GSM277673.CEL.gz; ftp://ftp.ncbi.nlm.nih.gov/geo/samples/GSM277nnn/GSM277673/suppl/GSM277673.CHP.gz	45101	1	not.included
57	252572	RPE/choroid_old_rep2	GSM277674	GSE10965	GPL1261	Public on Mar 29 2008	2008-03-27	2008-03-28	RNA	old retinal pigmental epithelium/choroid	Mus musculus	Strain:C57BL/6, Gender: male, Age: 26 months, Tissue: retinal pigmental epithelium/choroid	total RNA	biotin	NA	Total RNA was extracted by using RNeasy Minikit from Qiagen.	standard Affymetrix labeling	NA	NA	NA	NA	NA	NA	NA	NA	standard Affymetrix hybridization	N/A	Based on the affymetrix .cel files, invariant set normalization was performed using dchip2006 and PM-only model was used for generating gene signal intensities.	Name: Huiyi Chen; Email: huiyi-chen@northwestern.edu; Department: Ophthalmology; Institute: Northwestern University School of Medicine ; Address: 303 E Chicago Ave, Tarry 13-752; City: Chicago; State: IL; Zip/postal_code: 60611; Country: USA	ftp://ftp.ncbi.nlm.nih.gov/geo/samples/GSM277nnn/GSM277674/suppl/GSM277674.CEL.gz; ftp://ftp.ncbi.nlm.nih.gov/geo/samples/GSM277nnn/GSM277674/suppl/GSM277674.CHP.gz	45101	1	not.included
58	252573	RPE/choroid_old_rep3	GSM277675	GSE10965	GPL1261	Public on Mar 29 2008	2008-03-27	2008-03-28	RNA	old retinal pigmental epithelium/choroid	Mus musculus	Strain:C57BL/6, Gender: male, Age: 26 months, Tissue: retinal pigmental epithelium/choroid	total RNA	biotin	NA	Total RNA was extracted by using RNeasy Minikit from Qiagen.	standard Affymetrix labeling	NA	NA	NA	NA	NA	NA	NA	NA	standard Affymetrix hybridization	N/A	Based on the affymetrix .cel files, invariant set normalization was performed using dchip2006 and PM-only model was used for generating gene signal intensities.	Name: Huiyi Chen; Email: huiyi-chen@northwestern.edu; Department: Ophthalmology; Institute: Northwestern University School of Medicine ; Address: 303 E Chicago Ave, Tarry 13-752; City: Chicago; State: IL; Zip/postal_code: 60611; Country: USA	ftp://ftp.ncbi.nlm.nih.gov/geo/samples/GSM277nnn/GSM277675/suppl/GSM277675.CEL.gz; ftp://ftp.ncbi.nlm.nih.gov/geo/samples/GSM277nnn/GSM277675/suppl/GSM277675.CHP.gz	45101	1	not.included
59	252574	RPE/choroid_old_rep4	GSM277676	GSE10965	GPL1261	Public on Mar 29 2008	2008-03-27	2008-03-28	RNA	old retinal pigmental epithelium/choroid	Mus musculus	Strain:C57BL/6, Gender: male, Age: 26 months, Tissue: retinal pigmental epithelium/choroid	total RNA	biotin	NA	Total RNA was extracted by using RNeasy Minikit from Qiagen.	standard Affymetrix labeling	NA	NA	NA	NA	NA	NA	NA	NA	standard Affymetrix hybridization	N/A	Based on the affymetrix .cel files, invariant set normalization was performed using dchip2006 and PM-only model was used for generating gene signal intensities.	Name: Huiyi Chen; Email: huiyi-chen@northwestern.edu; Department: Ophthalmology; Institute: Northwestern University School of Medicine ; Address: 303 E Chicago Ave, Tarry 13-752; City: Chicago; State: IL; Zip/postal_code: 60611; Country: USA	ftp://ftp.ncbi.nlm.nih.gov/geo/samples/GSM277nnn/GSM277676/suppl/GSM277676.CEL.gz; ftp://ftp.ncbi.nlm.nih.gov/geo/samples/GSM277nnn/GSM277676/suppl/GSM277676.CHP.gz	45101	1	not.included
60	380918	P14 +/+ retina, biological rep1	GSM416868	GSE16585	GPL1261	Public on Oct 19 2009	2009-06-12	2009-10-19	RNA	P14 +/+ retina	Mus musculus	age: P14; tissue: retina; genotype: +/+	total RNA	biotin	NA	Each sample consists of 2 retina from one mouse and was snap frozen on dry ice. Total RNA was isolated with Trizol (Invitrogen).	5ug of total RNA was used as the starting material for GeneChip One-Cycle Target Labeling and Control Reagents (Affymetrix).	NA	NA	NA	NA	NA	NA	NA	NA	15ug of biotinylated-cRNA was hybridized to GeneChip Mouse Genome 430 2.0 arrays according to GeneChip Expression Analysis Techinical Manual (Affymetrix, P/N 701021 Rev. 5).	2 retina from one mouse	The Robust Multichip Average (RMA) method was used for background correction, quantile normalization, and summarization of expression scores.	Name: Douglas Forrest; Email: forrestd@niddk.nih.gov; Phone: 301-594-6170; Fax: 301-451-7848; Department: Clinical Endocrinology Branch; Institute: National Institute of Diabetes and Digestive and Kidney Diseases (NIDDK); Address: 10 Center Drive; City: Bethesda; State: MD; Zip/postal_code: 20892; Country: USA	ftp://ftp.ncbi.nlm.nih.gov/geo/samples/GSM416nnn/GSM416868/suppl/GSM416868.CEL.gz	45101	1	whole.retina
61	380919	P14 +/+ retina, biological rep2	GSM416869	GSE16585	GPL1261	Public on Oct 19 2009	2009-06-12	2009-10-19	RNA	P14 +/+ retina	Mus musculus	age: P14; tissue: retina; genotype: +/+	total RNA	biotin	NA	Each sample consists of 2 retina from one mouse and was snap frozen on dry ice. Total RNA was isolated with Trizol (Invitrogen).	5ug of total RNA was used as the starting material for GeneChip One-Cycle Target Labeling and Control Reagents (Affymetrix).	NA	NA	NA	NA	NA	NA	NA	NA	15ug of biotinylated-cRNA was hybridized to GeneChip Mouse Genome 430 2.0 arrays according to GeneChip Expression Analysis Techinical Manual (Affymetrix, P/N 701021 Rev. 5).	2 retina from one mouse	The Robust Multichip Average (RMA) method was used for background correction, quantile normalization, and summarization of expression scores.	Name: Douglas Forrest; Email: forrestd@niddk.nih.gov; Phone: 301-594-6170; Fax: 301-451-7848; Department: Clinical Endocrinology Branch; Institute: National Institute of Diabetes and Digestive and Kidney Diseases (NIDDK); Address: 10 Center Drive; City: Bethesda; State: MD; Zip/postal_code: 20892; Country: USA	ftp://ftp.ncbi.nlm.nih.gov/geo/samples/GSM416nnn/GSM416869/suppl/GSM416869.CEL.gz	45101	1	whole.retina
62	380920	P14 +/+ retina, biological rep3	GSM416870	GSE16585	GPL1261	Public on Oct 19 2009	2009-06-12	2009-10-19	RNA	P14 +/+ retina	Mus musculus	age: P14; tissue: retina; genotype: +/+	total RNA	biotin	NA	Each sample consists of 2 retina from one mouse and was snap frozen on dry ice. Total RNA was isolated with Trizol (Invitrogen).	5ug of total RNA was used as the starting material for GeneChip One-Cycle Target Labeling and Control Reagents (Affymetrix).	NA	NA	NA	NA	NA	NA	NA	NA	15ug of biotinylated-cRNA was hybridized to GeneChip Mouse Genome 430 2.0 arrays according to GeneChip Expression Analysis Techinical Manual (Affymetrix, P/N 701021 Rev. 5).	2 retina from one mouse	The Robust Multichip Average (RMA) method was used for background correction, quantile normalization, and summarization of expression scores.	Name: Douglas Forrest; Email: forrestd@niddk.nih.gov; Phone: 301-594-6170; Fax: 301-451-7848; Department: Clinical Endocrinology Branch; Institute: National Institute of Diabetes and Digestive and Kidney Diseases (NIDDK); Address: 10 Center Drive; City: Bethesda; State: MD; Zip/postal_code: 20892; Country: USA	ftp://ftp.ncbi.nlm.nih.gov/geo/samples/GSM416nnn/GSM416870/suppl/GSM416870.CEL.gz	45101	1	whole.retina
63	380921	P14 +/+ retina, biological rep4	GSM416871	GSE16585	GPL1261	Public on Oct 19 2009	2009-06-12	2009-10-19	RNA	P14 +/+ retina	Mus musculus	age: P14; tissue: retina; genotype: +/+	total RNA	biotin	NA	Each sample consists of 2 retina from one mouse and was snap frozen on dry ice. Total RNA was isolated with Trizol (Invitrogen).	5ug of total RNA was used as the starting material for GeneChip One-Cycle Target Labeling and Control Reagents (Affymetrix).	NA	NA	NA	NA	NA	NA	NA	NA	15ug of biotinylated-cRNA was hybridized to GeneChip Mouse Genome 430 2.0 arrays according to GeneChip Expression Analysis Techinical Manual (Affymetrix, P/N 701021 Rev. 5).	2 retina from one mouse	The Robust Multichip Average (RMA) method was used for background correction, quantile normalization, and summarization of expression scores.	Name: Douglas Forrest; Email: forrestd@niddk.nih.gov; Phone: 301-594-6170; Fax: 301-451-7848; Department: Clinical Endocrinology Branch; Institute: National Institute of Diabetes and Digestive and Kidney Diseases (NIDDK); Address: 10 Center Drive; City: Bethesda; State: MD; Zip/postal_code: 20892; Country: USA	ftp://ftp.ncbi.nlm.nih.gov/geo/samples/GSM416nnn/GSM416871/suppl/GSM416871.CEL.gz	45101	1	whole.retina
64	380922	P14 Rorb-/- retina, biological rep1	GSM416872	GSE16585	GPL1261	Public on Oct 19 2009	2009-06-12	2009-10-19	RNA	P14 Rorb-/- retina	Mus musculus	age: P14; tissue: retina; genotype: Rorb-/-	total RNA	biotin	NA	Each sample consists of 2 retina from one mouse and was snap frozen on dry ice. Total RNA was isolated with Trizol (Invitrogen).	5ug of total RNA was used as the starting material for GeneChip One-Cycle Target Labeling and Control Reagents (Affymetrix).	NA	NA	NA	NA	NA	NA	NA	NA	15ug of biotinylated-cRNA was hybridized to GeneChip Mouse Genome 430 2.0 arrays according to GeneChip Expression Analysis Techinical Manual (Affymetrix, P/N 701021 Rev. 5).	2 retina from one mouse	The Robust Multichip Average (RMA) method was used for background correction, quantile normalization, and summarization of expression scores.	Name: Douglas Forrest; Email: forrestd@niddk.nih.gov; Phone: 301-594-6170; Fax: 301-451-7848; Department: Clinical Endocrinology Branch; Institute: National Institute of Diabetes and Digestive and Kidney Diseases (NIDDK); Address: 10 Center Drive; City: Bethesda; State: MD; Zip/postal_code: 20892; Country: USA	ftp://ftp.ncbi.nlm.nih.gov/geo/samples/GSM416nnn/GSM416872/suppl/GSM416872.CEL.gz	45101	1	not.included
65	380923	P14 Rorb-/- retina, biological rep2	GSM416873	GSE16585	GPL1261	Public on Oct 19 2009	2009-06-12	2009-10-19	RNA	P14 Rorb-/- retina	Mus musculus	age: P14; tissue: retina; genotype: Rorb-/-	total RNA	biotin	NA	Each sample consists of 2 retina from one mouse and was snap frozen on dry ice. Total RNA was isolated with Trizol (Invitrogen).	5ug of total RNA was used as the starting material for GeneChip One-Cycle Target Labeling and Control Reagents (Affymetrix).	NA	NA	NA	NA	NA	NA	NA	NA	15ug of biotinylated-cRNA was hybridized to GeneChip Mouse Genome 430 2.0 arrays according to GeneChip Expression Analysis Techinical Manual (Affymetrix, P/N 701021 Rev. 5).	2 retina from one mouse	The Robust Multichip Average (RMA) method was used for background correction, quantile normalization, and summarization of expression scores.	Name: Douglas Forrest; Email: forrestd@niddk.nih.gov; Phone: 301-594-6170; Fax: 301-451-7848; Department: Clinical Endocrinology Branch; Institute: National Institute of Diabetes and Digestive and Kidney Diseases (NIDDK); Address: 10 Center Drive; City: Bethesda; State: MD; Zip/postal_code: 20892; Country: USA	ftp://ftp.ncbi.nlm.nih.gov/geo/samples/GSM416nnn/GSM416873/suppl/GSM416873.CEL.gz	45101	1	not.included
66	380924	P14 Rorb-/- retina, biological rep3	GSM416874	GSE16585	GPL1261	Public on Oct 19 2009	2009-06-12	2009-10-19	RNA	P14 Rorb-/- retina	Mus musculus	age: P14; tissue: retina; genotype: Rorb-/-	total RNA	biotin	NA	Each sample consists of 2 retina from one mouse and was snap frozen on dry ice. Total RNA was isolated with Trizol (Invitrogen).	5ug of total RNA was used as the starting material for GeneChip One-Cycle Target Labeling and Control Reagents (Affymetrix).	NA	NA	NA	NA	NA	NA	NA	NA	15ug of biotinylated-cRNA was hybridized to GeneChip Mouse Genome 430 2.0 arrays according to GeneChip Expression Analysis Techinical Manual (Affymetrix, P/N 701021 Rev. 5).	2 retina from one mouse	The Robust Multichip Average (RMA) method was used for background correction, quantile normalization, and summarization of expression scores.	Name: Douglas Forrest; Email: forrestd@niddk.nih.gov; Phone: 301-594-6170; Fax: 301-451-7848; Department: Clinical Endocrinology Branch; Institute: National Institute of Diabetes and Digestive and Kidney Diseases (NIDDK); Address: 10 Center Drive; City: Bethesda; State: MD; Zip/postal_code: 20892; Country: USA	ftp://ftp.ncbi.nlm.nih.gov/geo/samples/GSM416nnn/GSM416874/suppl/GSM416874.CEL.gz	45101	1	not.included
67	380925	P14 Rorb-/- retina, biological rep4	GSM416875	GSE16585	GPL1261	Public on Oct 19 2009	2009-06-12	2009-10-19	RNA	P14 Rorb-/- retina	Mus musculus	age: P14; tissue: retina; genotype: Rorb-/-	total RNA	biotin	NA	Each sample consists of 2 retina from one mouse and was snap frozen on dry ice. Total RNA was isolated with Trizol (Invitrogen).	5ug of total RNA was used as the starting material for GeneChip One-Cycle Target Labeling and Control Reagents (Affymetrix).	NA	NA	NA	NA	NA	NA	NA	NA	15ug of biotinylated-cRNA was hybridized to GeneChip Mouse Genome 430 2.0 arrays according to GeneChip Expression Analysis Techinical Manual (Affymetrix, P/N 701021 Rev. 5).	2 retina from one mouse	The Robust Multichip Average (RMA) method was used for background correction, quantile normalization, and summarization of expression scores.	Name: Douglas Forrest; Email: forrestd@niddk.nih.gov; Phone: 301-594-6170; Fax: 301-451-7848; Department: Clinical Endocrinology Branch; Institute: National Institute of Diabetes and Digestive and Kidney Diseases (NIDDK); Address: 10 Center Drive; City: Bethesda; State: MD; Zip/postal_code: 20892; Country: USA	ftp://ftp.ncbi.nlm.nih.gov/geo/samples/GSM416nnn/GSM416875/suppl/GSM416875.CEL.gz	45101	1	not.included
68	380926	P14 +/+;CrxpNrl retina, biological rep1	GSM416876	GSE16585	GPL1261	Public on Oct 19 2009	2009-06-12	2009-10-19	RNA	P14 +/+;CrxpNrl retina	Mus musculus	age: P14; tissue: retina; genotype: +/+;CrxpNrl	total RNA	biotin	NA	Each sample consists of 2 retina from one mouse and was snap frozen on dry ice. Total RNA was isolated with Trizol (Invitrogen).	5ug of total RNA was used as the starting material for GeneChip One-Cycle Target Labeling and Control Reagents (Affymetrix).	NA	NA	NA	NA	NA	NA	NA	NA	15ug of biotinylated-cRNA was hybridized to GeneChip Mouse Genome 430 2.0 arrays according to GeneChip Expression Analysis Techinical Manual (Affymetrix, P/N 701021 Rev. 5).	2 retina from one mouse	The Robust Multichip Average (RMA) method was used for background correction, quantile normalization, and summarization of expression scores.	Name: Douglas Forrest; Email: forrestd@niddk.nih.gov; Phone: 301-594-6170; Fax: 301-451-7848; Department: Clinical Endocrinology Branch; Institute: National Institute of Diabetes and Digestive and Kidney Diseases (NIDDK); Address: 10 Center Drive; City: Bethesda; State: MD; Zip/postal_code: 20892; Country: USA	ftp://ftp.ncbi.nlm.nih.gov/geo/samples/GSM416nnn/GSM416876/suppl/GSM416876.CEL.gz	45101	1	not.included
69	380927	P14 +/+;CrxpNrl retina, biological rep2	GSM416877	GSE16585	GPL1261	Public on Oct 19 2009	2009-06-12	2009-10-19	RNA	P14 +/+;CrxpNrl retina	Mus musculus	age: P14; tissue: retina; genotype: +/+;CrxpNrl	total RNA	biotin	NA	Each sample consists of 2 retina from one mouse and was snap frozen on dry ice. Total RNA was isolated with Trizol (Invitrogen).	5ug of total RNA was used as the starting material for GeneChip One-Cycle Target Labeling and Control Reagents (Affymetrix).	NA	NA	NA	NA	NA	NA	NA	NA	15ug of biotinylated-cRNA was hybridized to GeneChip Mouse Genome 430 2.0 arrays according to GeneChip Expression Analysis Techinical Manual (Affymetrix, P/N 701021 Rev. 5).	2 retina from one mouse	The Robust Multichip Average (RMA) method was used for background correction, quantile normalization, and summarization of expression scores.	Name: Douglas Forrest; Email: forrestd@niddk.nih.gov; Phone: 301-594-6170; Fax: 301-451-7848; Department: Clinical Endocrinology Branch; Institute: National Institute of Diabetes and Digestive and Kidney Diseases (NIDDK); Address: 10 Center Drive; City: Bethesda; State: MD; Zip/postal_code: 20892; Country: USA	ftp://ftp.ncbi.nlm.nih.gov/geo/samples/GSM416nnn/GSM416877/suppl/GSM416877.CEL.gz	45101	1	not.included
70	380928	P14 +/+;CrxpNrl retina, biological rep3	GSM416878	GSE16585	GPL1261	Public on Oct 19 2009	2009-06-12	2009-10-19	RNA	P14 +/+;CrxpNrl retina	Mus musculus	age: P14; tissue: retina; genotype: +/+;CrxpNrl	total RNA	biotin	NA	Each sample consists of 2 retina from one mouse and was snap frozen on dry ice. Total RNA was isolated with Trizol (Invitrogen).	5ug of total RNA was used as the starting material for GeneChip One-Cycle Target Labeling and Control Reagents (Affymetrix).	NA	NA	NA	NA	NA	NA	NA	NA	15ug of biotinylated-cRNA was hybridized to GeneChip Mouse Genome 430 2.0 arrays according to GeneChip Expression Analysis Techinical Manual (Affymetrix, P/N 701021 Rev. 5).	2 retina from one mouse	The Robust Multichip Average (RMA) method was used for background correction, quantile normalization, and summarization of expression scores.	Name: Douglas Forrest; Email: forrestd@niddk.nih.gov; Phone: 301-594-6170; Fax: 301-451-7848; Department: Clinical Endocrinology Branch; Institute: National Institute of Diabetes and Digestive and Kidney Diseases (NIDDK); Address: 10 Center Drive; City: Bethesda; State: MD; Zip/postal_code: 20892; Country: USA	ftp://ftp.ncbi.nlm.nih.gov/geo/samples/GSM416nnn/GSM416878/suppl/GSM416878.CEL.gz	45101	1	not.included
71	380929	P14 +/+;CrxpNrl retina, biological rep4	GSM416879	GSE16585	GPL1261	Public on Oct 19 2009	2009-06-12	2009-10-19	RNA	P14 +/+;CrxpNrl retina	Mus musculus	age: P14; tissue: retina; genotype: +/+;CrxpNrl	total RNA	biotin	NA	Each sample consists of 2 retina from one mouse and was snap frozen on dry ice. Total RNA was isolated with Trizol (Invitrogen).	5ug of total RNA was used as the starting material for GeneChip One-Cycle Target Labeling and Control Reagents (Affymetrix).	NA	NA	NA	NA	NA	NA	NA	NA	15ug of biotinylated-cRNA was hybridized to GeneChip Mouse Genome 430 2.0 arrays according to GeneChip Expression Analysis Techinical Manual (Affymetrix, P/N 701021 Rev. 5).	2 retina from one mouse	The Robust Multichip Average (RMA) method was used for background correction, quantile normalization, and summarization of expression scores.	Name: Douglas Forrest; Email: forrestd@niddk.nih.gov; Phone: 301-594-6170; Fax: 301-451-7848; Department: Clinical Endocrinology Branch; Institute: National Institute of Diabetes and Digestive and Kidney Diseases (NIDDK); Address: 10 Center Drive; City: Bethesda; State: MD; Zip/postal_code: 20892; Country: USA	ftp://ftp.ncbi.nlm.nih.gov/geo/samples/GSM416nnn/GSM416879/suppl/GSM416879.CEL.gz	45101	1	not.included
72	380930	P14 Rorb-/-;CrxpNrl retina, biological rep1	GSM416880	GSE16585	GPL1261	Public on Oct 19 2009	2009-06-12	2009-10-19	RNA	P14 Rorb-/-;CrxpNrl retina	Mus musculus	age: P14; tissue: retina; genotype: Rorb-/-;CrxpNrl	total RNA	biotin	NA	Each sample consists of 2 retina from one mouse and was snap frozen on dry ice. Total RNA was isolated with Trizol (Invitrogen).	5ug of total RNA was used as the starting material for GeneChip One-Cycle Target Labeling and Control Reagents (Affymetrix).	NA	NA	NA	NA	NA	NA	NA	NA	15ug of biotinylated-cRNA was hybridized to GeneChip Mouse Genome 430 2.0 arrays according to GeneChip Expression Analysis Techinical Manual (Affymetrix, P/N 701021 Rev. 5).	2 retina from one mouse	The Robust Multichip Average (RMA) method was used for background correction, quantile normalization, and summarization of expression scores.	Name: Douglas Forrest; Email: forrestd@niddk.nih.gov; Phone: 301-594-6170; Fax: 301-451-7848; Department: Clinical Endocrinology Branch; Institute: National Institute of Diabetes and Digestive and Kidney Diseases (NIDDK); Address: 10 Center Drive; City: Bethesda; State: MD; Zip/postal_code: 20892; Country: USA	ftp://ftp.ncbi.nlm.nih.gov/geo/samples/GSM416nnn/GSM416880/suppl/GSM416880.CEL.gz	45101	1	not.included
73	380931	P14 Rorb-/-;CrxpNrl retina, biological rep2	GSM416881	GSE16585	GPL1261	Public on Oct 19 2009	2009-06-12	2009-10-19	RNA	P14 Rorb-/-;CrxpNrl retina	Mus musculus	age: P14; tissue: retina; genotype: Rorb-/-;CrxpNrl	total RNA	biotin	NA	Each sample consists of 2 retina from one mouse and was snap frozen on dry ice. Total RNA was isolated with Trizol (Invitrogen).	5ug of total RNA was used as the starting material for GeneChip One-Cycle Target Labeling and Control Reagents (Affymetrix).	NA	NA	NA	NA	NA	NA	NA	NA	15ug of biotinylated-cRNA was hybridized to GeneChip Mouse Genome 430 2.0 arrays according to GeneChip Expression Analysis Techinical Manual (Affymetrix, P/N 701021 Rev. 5).	2 retina from one mouse	The Robust Multichip Average (RMA) method was used for background correction, quantile normalization, and summarization of expression scores.	Name: Douglas Forrest; Email: forrestd@niddk.nih.gov; Phone: 301-594-6170; Fax: 301-451-7848; Department: Clinical Endocrinology Branch; Institute: National Institute of Diabetes and Digestive and Kidney Diseases (NIDDK); Address: 10 Center Drive; City: Bethesda; State: MD; Zip/postal_code: 20892; Country: USA	ftp://ftp.ncbi.nlm.nih.gov/geo/samples/GSM416nnn/GSM416881/suppl/GSM416881.CEL.gz	45101	1	not.included
74	380932	P14 Rorb-/-;CrxpNrl retina, biological rep3	GSM416882	GSE16585	GPL1261	Public on Oct 19 2009	2009-06-12	2009-10-19	RNA	P14 Rorb-/-;CrxpNrl retina	Mus musculus	age: P14; tissue: retina; genotype: Rorb-/-;CrxpNrl	total RNA	biotin	NA	Each sample consists of 2 retina from one mouse and was snap frozen on dry ice. Total RNA was isolated with Trizol (Invitrogen).	5ug of total RNA was used as the starting material for GeneChip One-Cycle Target Labeling and Control Reagents (Affymetrix).	NA	NA	NA	NA	NA	NA	NA	NA	15ug of biotinylated-cRNA was hybridized to GeneChip Mouse Genome 430 2.0 arrays according to GeneChip Expression Analysis Techinical Manual (Affymetrix, P/N 701021 Rev. 5).	2 retina from one mouse	The Robust Multichip Average (RMA) method was used for background correction, quantile normalization, and summarization of expression scores.	Name: Douglas Forrest; Email: forrestd@niddk.nih.gov; Phone: 301-594-6170; Fax: 301-451-7848; Department: Clinical Endocrinology Branch; Institute: National Institute of Diabetes and Digestive and Kidney Diseases (NIDDK); Address: 10 Center Drive; City: Bethesda; State: MD; Zip/postal_code: 20892; Country: USA	ftp://ftp.ncbi.nlm.nih.gov/geo/samples/GSM416nnn/GSM416882/suppl/GSM416882.CEL.gz	45101	1	not.included
75	380933	P14 Rorb-/-;CrxpNrl retina, biological rep4	GSM416883	GSE16585	GPL1261	Public on Oct 19 2009	2009-06-12	2009-10-19	RNA	P14 Rorb-/-;CrxpNrl retina	Mus musculus	age: P14; tissue: retina; genotype: Rorb-/-;CrxpNrl	total RNA	biotin	NA	Each sample consists of 2 retina from one mouse and was snap frozen on dry ice. Total RNA was isolated with Trizol (Invitrogen).	5ug of total RNA was used as the starting material for GeneChip One-Cycle Target Labeling and Control Reagents (Affymetrix).	NA	NA	NA	NA	NA	NA	NA	NA	15ug of biotinylated-cRNA was hybridized to GeneChip Mouse Genome 430 2.0 arrays according to GeneChip Expression Analysis Techinical Manual (Affymetrix, P/N 701021 Rev. 5).	2 retina from one mouse	The Robust Multichip Average (RMA) method was used for background correction, quantile normalization, and summarization of expression scores.	Name: Douglas Forrest; Email: forrestd@niddk.nih.gov; Phone: 301-594-6170; Fax: 301-451-7848; Department: Clinical Endocrinology Branch; Institute: National Institute of Diabetes and Digestive and Kidney Diseases (NIDDK); Address: 10 Center Drive; City: Bethesda; State: MD; Zip/postal_code: 20892; Country: USA	ftp://ftp.ncbi.nlm.nih.gov/geo/samples/GSM416nnn/GSM416883/suppl/GSM416883.CEL.gz	45101	1	not.included
76	380934	P28 +/+ retina, biological rep1	GSM416884	GSE16585	GPL1261	Public on Oct 19 2009	2009-06-12	2009-10-19	RNA	P28 +/+ retina	Mus musculus	age: P28; tissue: retina; genotype: +/+	total RNA	biotin	NA	Each sample consists of 2 retina from one mouse and was snap frozen on dry ice. Total RNA was isolated with Trizol (Invitrogen).	5ug of total RNA was used as the starting material for GeneChip One-Cycle Target Labeling and Control Reagents (Affymetrix).	NA	NA	NA	NA	NA	NA	NA	NA	15ug of biotinylated-cRNA was hybridized to GeneChip Mouse Genome 430 2.0 arrays according to GeneChip Expression Analysis Techinical Manual (Affymetrix, P/N 701021 Rev. 5).	2 retina from one mouse	The Robust Multichip Average (RMA) method was used for background correction, quantile normalization, and summarization of expression scores.	Name: Douglas Forrest; Email: forrestd@niddk.nih.gov; Phone: 301-594-6170; Fax: 301-451-7848; Department: Clinical Endocrinology Branch; Institute: National Institute of Diabetes and Digestive and Kidney Diseases (NIDDK); Address: 10 Center Drive; City: Bethesda; State: MD; Zip/postal_code: 20892; Country: USA	ftp://ftp.ncbi.nlm.nih.gov/geo/samples/GSM416nnn/GSM416884/suppl/GSM416884.CEL.gz	45101	1	whole.retina
77	380935	P28 +/+ retina, biological rep2	GSM416885	GSE16585	GPL1261	Public on Oct 19 2009	2009-06-12	2009-10-19	RNA	P28 +/+ retina	Mus musculus	age: P28; tissue: retina; genotype: +/+	total RNA	biotin	NA	Each sample consists of 2 retina from one mouse and was snap frozen on dry ice. Total RNA was isolated with Trizol (Invitrogen).	5ug of total RNA was used as the starting material for GeneChip One-Cycle Target Labeling and Control Reagents (Affymetrix).	NA	NA	NA	NA	NA	NA	NA	NA	15ug of biotinylated-cRNA was hybridized to GeneChip Mouse Genome 430 2.0 arrays according to GeneChip Expression Analysis Techinical Manual (Affymetrix, P/N 701021 Rev. 5).	2 retina from one mouse	The Robust Multichip Average (RMA) method was used for background correction, quantile normalization, and summarization of expression scores.	Name: Douglas Forrest; Email: forrestd@niddk.nih.gov; Phone: 301-594-6170; Fax: 301-451-7848; Department: Clinical Endocrinology Branch; Institute: National Institute of Diabetes and Digestive and Kidney Diseases (NIDDK); Address: 10 Center Drive; City: Bethesda; State: MD; Zip/postal_code: 20892; Country: USA	ftp://ftp.ncbi.nlm.nih.gov/geo/samples/GSM416nnn/GSM416885/suppl/GSM416885.CEL.gz	45101	1	whole.retina
78	380936	P28 +/+ retina, biological rep3	GSM416886	GSE16585	GPL1261	Public on Oct 19 2009	2009-06-12	2009-10-19	RNA	P28 +/+ retina	Mus musculus	age: P28; tissue: retina; genotype: +/+	total RNA	biotin	NA	Each sample consists of 2 retina from one mouse and was snap frozen on dry ice. Total RNA was isolated with Trizol (Invitrogen).	5ug of total RNA was used as the starting material for GeneChip One-Cycle Target Labeling and Control Reagents (Affymetrix).	NA	NA	NA	NA	NA	NA	NA	NA	15ug of biotinylated-cRNA was hybridized to GeneChip Mouse Genome 430 2.0 arrays according to GeneChip Expression Analysis Techinical Manual (Affymetrix, P/N 701021 Rev. 5).	2 retina from one mouse	The Robust Multichip Average (RMA) method was used for background correction, quantile normalization, and summarization of expression scores.	Name: Douglas Forrest; Email: forrestd@niddk.nih.gov; Phone: 301-594-6170; Fax: 301-451-7848; Department: Clinical Endocrinology Branch; Institute: National Institute of Diabetes and Digestive and Kidney Diseases (NIDDK); Address: 10 Center Drive; City: Bethesda; State: MD; Zip/postal_code: 20892; Country: USA	ftp://ftp.ncbi.nlm.nih.gov/geo/samples/GSM416nnn/GSM416886/suppl/GSM416886.CEL.gz	45101	1	whole.retina
79	380937	P28 +/+ retina, biological rep4	GSM416887	GSE16585	GPL1261	Public on Oct 19 2009	2009-06-12	2009-10-19	RNA	P28 +/+ retina	Mus musculus	age: P28; tissue: retina; genotype: +/+	total RNA	biotin	NA	Each sample consists of 2 retina from one mouse and was snap frozen on dry ice. Total RNA was isolated with Trizol (Invitrogen).	5ug of total RNA was used as the starting material for GeneChip One-Cycle Target Labeling and Control Reagents (Affymetrix).	NA	NA	NA	NA	NA	NA	NA	NA	15ug of biotinylated-cRNA was hybridized to GeneChip Mouse Genome 430 2.0 arrays according to GeneChip Expression Analysis Techinical Manual (Affymetrix, P/N 701021 Rev. 5).	2 retina from one mouse	The Robust Multichip Average (RMA) method was used for background correction, quantile normalization, and summarization of expression scores.	Name: Douglas Forrest; Email: forrestd@niddk.nih.gov; Phone: 301-594-6170; Fax: 301-451-7848; Department: Clinical Endocrinology Branch; Institute: National Institute of Diabetes and Digestive and Kidney Diseases (NIDDK); Address: 10 Center Drive; City: Bethesda; State: MD; Zip/postal_code: 20892; Country: USA	ftp://ftp.ncbi.nlm.nih.gov/geo/samples/GSM416nnn/GSM416887/suppl/GSM416887.CEL.gz	45101	1	whole.retina
80	380938	P28 Rorb-/- retina, biological rep1	GSM416888	GSE16585	GPL1261	Public on Oct 19 2009	2009-06-12	2009-10-19	RNA	P28 Rorb-/- retina	Mus musculus	age: P28; tissue: retina; genotype: Rorb-/-	total RNA	biotin	NA	Each sample consists of 2 retina from one mouse and was snap frozen on dry ice. Total RNA was isolated with Trizol (Invitrogen).	5ug of total RNA was used as the starting material for GeneChip One-Cycle Target Labeling and Control Reagents (Affymetrix).	NA	NA	NA	NA	NA	NA	NA	NA	15ug of biotinylated-cRNA was hybridized to GeneChip Mouse Genome 430 2.0 arrays according to GeneChip Expression Analysis Techinical Manual (Affymetrix, P/N 701021 Rev. 5).	2 retina from one mouse	The Robust Multichip Average (RMA) method was used for background correction, quantile normalization, and summarization of expression scores.	Name: Douglas Forrest; Email: forrestd@niddk.nih.gov; Phone: 301-594-6170; Fax: 301-451-7848; Department: Clinical Endocrinology Branch; Institute: National Institute of Diabetes and Digestive and Kidney Diseases (NIDDK); Address: 10 Center Drive; City: Bethesda; State: MD; Zip/postal_code: 20892; Country: USA	ftp://ftp.ncbi.nlm.nih.gov/geo/samples/GSM416nnn/GSM416888/suppl/GSM416888.CEL.gz	45101	1	not.included
81	380939	P28 Rorb-/- retina, biological rep2	GSM416889	GSE16585	GPL1261	Public on Oct 19 2009	2009-06-12	2009-10-19	RNA	P28 Rorb-/- retina	Mus musculus	age: P28; tissue: retina; genotype: Rorb-/-	total RNA	biotin	NA	Each sample consists of 2 retina from one mouse and was snap frozen on dry ice. Total RNA was isolated with Trizol (Invitrogen).	5ug of total RNA was used as the starting material for GeneChip One-Cycle Target Labeling and Control Reagents (Affymetrix).	NA	NA	NA	NA	NA	NA	NA	NA	15ug of biotinylated-cRNA was hybridized to GeneChip Mouse Genome 430 2.0 arrays according to GeneChip Expression Analysis Techinical Manual (Affymetrix, P/N 701021 Rev. 5).	2 retina from one mouse	The Robust Multichip Average (RMA) method was used for background correction, quantile normalization, and summarization of expression scores.	Name: Douglas Forrest; Email: forrestd@niddk.nih.gov; Phone: 301-594-6170; Fax: 301-451-7848; Department: Clinical Endocrinology Branch; Institute: National Institute of Diabetes and Digestive and Kidney Diseases (NIDDK); Address: 10 Center Drive; City: Bethesda; State: MD; Zip/postal_code: 20892; Country: USA	ftp://ftp.ncbi.nlm.nih.gov/geo/samples/GSM416nnn/GSM416889/suppl/GSM416889.CEL.gz	45101	1	not.included
82	380940	P28 Rorb-/- retina, biological rep3	GSM416890	GSE16585	GPL1261	Public on Oct 19 2009	2009-06-12	2009-10-19	RNA	P28 Rorb-/- retina	Mus musculus	age: P28; tissue: retina; genotype: Rorb-/-	total RNA	biotin	NA	Each sample consists of 2 retina from one mouse and was snap frozen on dry ice. Total RNA was isolated with Trizol (Invitrogen).	5ug of total RNA was used as the starting material for GeneChip One-Cycle Target Labeling and Control Reagents (Affymetrix).	NA	NA	NA	NA	NA	NA	NA	NA	15ug of biotinylated-cRNA was hybridized to GeneChip Mouse Genome 430 2.0 arrays according to GeneChip Expression Analysis Techinical Manual (Affymetrix, P/N 701021 Rev. 5).	2 retina from one mouse	The Robust Multichip Average (RMA) method was used for background correction, quantile normalization, and summarization of expression scores.	Name: Douglas Forrest; Email: forrestd@niddk.nih.gov; Phone: 301-594-6170; Fax: 301-451-7848; Department: Clinical Endocrinology Branch; Institute: National Institute of Diabetes and Digestive and Kidney Diseases (NIDDK); Address: 10 Center Drive; City: Bethesda; State: MD; Zip/postal_code: 20892; Country: USA	ftp://ftp.ncbi.nlm.nih.gov/geo/samples/GSM416nnn/GSM416890/suppl/GSM416890.CEL.gz	45101	1	not.included
83	380941	P28 Rorb-/- retina, biological rep4	GSM416891	GSE16585	GPL1261	Public on Oct 19 2009	2009-06-12	2009-10-19	RNA	P28 Rorb-/- retina	Mus musculus	age: P28; tissue: retina; genotype: Rorb-/-	total RNA	biotin	NA	Each sample consists of 2 retina from one mouse and was snap frozen on dry ice. Total RNA was isolated with Trizol (Invitrogen).	5ug of total RNA was used as the starting material for GeneChip One-Cycle Target Labeling and Control Reagents (Affymetrix).	NA	NA	NA	NA	NA	NA	NA	NA	15ug of biotinylated-cRNA was hybridized to GeneChip Mouse Genome 430 2.0 arrays according to GeneChip Expression Analysis Techinical Manual (Affymetrix, P/N 701021 Rev. 5).	2 retina from one mouse	The Robust Multichip Average (RMA) method was used for background correction, quantile normalization, and summarization of expression scores.	Name: Douglas Forrest; Email: forrestd@niddk.nih.gov; Phone: 301-594-6170; Fax: 301-451-7848; Department: Clinical Endocrinology Branch; Institute: National Institute of Diabetes and Digestive and Kidney Diseases (NIDDK); Address: 10 Center Drive; City: Bethesda; State: MD; Zip/postal_code: 20892; Country: USA	ftp://ftp.ncbi.nlm.nih.gov/geo/samples/GSM416nnn/GSM416891/suppl/GSM416891.CEL.gz	45101	1	not.included
84	380942	P28 +/+;CrxpNrl retina, biological rep1	GSM416892	GSE16585	GPL1261	Public on Oct 19 2009	2009-06-12	2009-10-19	RNA	P28 +/+;CrxpNrl retina	Mus musculus	age: P28; tissue: retina; genotype: +/+;CrxpNrl	total RNA	biotin	NA	Each sample consists of 2 retina from one mouse and was snap frozen on dry ice. Total RNA was isolated with Trizol (Invitrogen).	5ug of total RNA was used as the starting material for GeneChip One-Cycle Target Labeling and Control Reagents (Affymetrix).	NA	NA	NA	NA	NA	NA	NA	NA	15ug of biotinylated-cRNA was hybridized to GeneChip Mouse Genome 430 2.0 arrays according to GeneChip Expression Analysis Techinical Manual (Affymetrix, P/N 701021 Rev. 5).	2 retina from one mouse	The Robust Multichip Average (RMA) method was used for background correction, quantile normalization, and summarization of expression scores.	Name: Douglas Forrest; Email: forrestd@niddk.nih.gov; Phone: 301-594-6170; Fax: 301-451-7848; Department: Clinical Endocrinology Branch; Institute: National Institute of Diabetes and Digestive and Kidney Diseases (NIDDK); Address: 10 Center Drive; City: Bethesda; State: MD; Zip/postal_code: 20892; Country: USA	ftp://ftp.ncbi.nlm.nih.gov/geo/samples/GSM416nnn/GSM416892/suppl/GSM416892.CEL.gz	45101	1	not.included
85	380943	P28 +/+;CrxpNrl retina, biological rep2	GSM416893	GSE16585	GPL1261	Public on Oct 19 2009	2009-06-12	2009-10-19	RNA	P28 +/+;CrxpNrl retina	Mus musculus	age: P28; tissue: retina; genotype: +/+;CrxpNrl	total RNA	biotin	NA	Each sample consists of 2 retina from one mouse and was snap frozen on dry ice. Total RNA was isolated with Trizol (Invitrogen).	5ug of total RNA was used as the starting material for GeneChip One-Cycle Target Labeling and Control Reagents (Affymetrix).	NA	NA	NA	NA	NA	NA	NA	NA	15ug of biotinylated-cRNA was hybridized to GeneChip Mouse Genome 430 2.0 arrays according to GeneChip Expression Analysis Techinical Manual (Affymetrix, P/N 701021 Rev. 5).	2 retina from one mouse	The Robust Multichip Average (RMA) method was used for background correction, quantile normalization, and summarization of expression scores.	Name: Douglas Forrest; Email: forrestd@niddk.nih.gov; Phone: 301-594-6170; Fax: 301-451-7848; Department: Clinical Endocrinology Branch; Institute: National Institute of Diabetes and Digestive and Kidney Diseases (NIDDK); Address: 10 Center Drive; City: Bethesda; State: MD; Zip/postal_code: 20892; Country: USA	ftp://ftp.ncbi.nlm.nih.gov/geo/samples/GSM416nnn/GSM416893/suppl/GSM416893.CEL.gz	45101	1	not.included
86	380944	P28 +/+;CrxpNrl retina, biological rep3	GSM416894	GSE16585	GPL1261	Public on Oct 19 2009	2009-06-12	2009-10-19	RNA	P28 +/+;CrxpNrl retina	Mus musculus	age: P28; tissue: retina; genotype: +/+;CrxpNrl	total RNA	biotin	NA	Each sample consists of 2 retina from one mouse and was snap frozen on dry ice. Total RNA was isolated with Trizol (Invitrogen).	5ug of total RNA was used as the starting material for GeneChip One-Cycle Target Labeling and Control Reagents (Affymetrix).	NA	NA	NA	NA	NA	NA	NA	NA	15ug of biotinylated-cRNA was hybridized to GeneChip Mouse Genome 430 2.0 arrays according to GeneChip Expression Analysis Techinical Manual (Affymetrix, P/N 701021 Rev. 5).	2 retina from one mouse	The Robust Multichip Average (RMA) method was used for background correction, quantile normalization, and summarization of expression scores.	Name: Douglas Forrest; Email: forrestd@niddk.nih.gov; Phone: 301-594-6170; Fax: 301-451-7848; Department: Clinical Endocrinology Branch; Institute: National Institute of Diabetes and Digestive and Kidney Diseases (NIDDK); Address: 10 Center Drive; City: Bethesda; State: MD; Zip/postal_code: 20892; Country: USA	ftp://ftp.ncbi.nlm.nih.gov/geo/samples/GSM416nnn/GSM416894/suppl/GSM416894.CEL.gz	45101	1	not.included
87	380945	P28 Rorb-/-;CrxpNrl retina, biological rep1	GSM416895	GSE16585	GPL1261	Public on Oct 19 2009	2009-06-12	2009-10-19	RNA	P28 Rorb-/-;CrxpNrl retina	Mus musculus	age: P28; tissue: retina; genotype: Rorb-/-;CrxpNrl	total RNA	biotin	NA	Each sample consists of 2 retina from one mouse and was snap frozen on dry ice. Total RNA was isolated with Trizol (Invitrogen).	5ug of total RNA was used as the starting material for GeneChip One-Cycle Target Labeling and Control Reagents (Affymetrix).	NA	NA	NA	NA	NA	NA	NA	NA	15ug of biotinylated-cRNA was hybridized to GeneChip Mouse Genome 430 2.0 arrays according to GeneChip Expression Analysis Techinical Manual (Affymetrix, P/N 701021 Rev. 5).	2 retina from one mouse	The Robust Multichip Average (RMA) method was used for background correction, quantile normalization, and summarization of expression scores.	Name: Douglas Forrest; Email: forrestd@niddk.nih.gov; Phone: 301-594-6170; Fax: 301-451-7848; Department: Clinical Endocrinology Branch; Institute: National Institute of Diabetes and Digestive and Kidney Diseases (NIDDK); Address: 10 Center Drive; City: Bethesda; State: MD; Zip/postal_code: 20892; Country: USA	ftp://ftp.ncbi.nlm.nih.gov/geo/samples/GSM416nnn/GSM416895/suppl/GSM416895.CEL.gz	45101	1	not.included
88	380946	P28 Rorb-/-;CrxpNrl retina, biological rep2	GSM416896	GSE16585	GPL1261	Public on Oct 19 2009	2009-06-12	2009-10-19	RNA	P28 Rorb-/-;CrxpNrl retina	Mus musculus	age: P28; tissue: retina; genotype: Rorb-/-;CrxpNrl	total RNA	biotin	NA	Each sample consists of 2 retina from one mouse and was snap frozen on dry ice. Total RNA was isolated with Trizol (Invitrogen).	5ug of total RNA was used as the starting material for GeneChip One-Cycle Target Labeling and Control Reagents (Affymetrix).	NA	NA	NA	NA	NA	NA	NA	NA	15ug of biotinylated-cRNA was hybridized to GeneChip Mouse Genome 430 2.0 arrays according to GeneChip Expression Analysis Techinical Manual (Affymetrix, P/N 701021 Rev. 5).	2 retina from one mouse	The Robust Multichip Average (RMA) method was used for background correction, quantile normalization, and summarization of expression scores.	Name: Douglas Forrest; Email: forrestd@niddk.nih.gov; Phone: 301-594-6170; Fax: 301-451-7848; Department: Clinical Endocrinology Branch; Institute: National Institute of Diabetes and Digestive and Kidney Diseases (NIDDK); Address: 10 Center Drive; City: Bethesda; State: MD; Zip/postal_code: 20892; Country: USA	ftp://ftp.ncbi.nlm.nih.gov/geo/samples/GSM416nnn/GSM416896/suppl/GSM416896.CEL.gz	45101	1	not.included
89	380947	P28 Rorb-/-;CrxpNrl retina, biological rep3	GSM416897	GSE16585	GPL1261	Public on Oct 19 2009	2009-06-12	2009-10-19	RNA	P28 Rorb-/-;CrxpNrl retina	Mus musculus	age: P28; tissue: retina; genotype: Rorb-/-;CrxpNrl	total RNA	biotin	NA	Each sample consists of 2 retina from one mouse and was snap frozen on dry ice. Total RNA was isolated with Trizol (Invitrogen).	5ug of total RNA was used as the starting material for GeneChip One-Cycle Target Labeling and Control Reagents (Affymetrix).	NA	NA	NA	NA	NA	NA	NA	NA	15ug of biotinylated-cRNA was hybridized to GeneChip Mouse Genome 430 2.0 arrays according to GeneChip Expression Analysis Techinical Manual (Affymetrix, P/N 701021 Rev. 5).	2 retina from one mouse	The Robust Multichip Average (RMA) method was used for background correction, quantile normalization, and summarization of expression scores.	Name: Douglas Forrest; Email: forrestd@niddk.nih.gov; Phone: 301-594-6170; Fax: 301-451-7848; Department: Clinical Endocrinology Branch; Institute: National Institute of Diabetes and Digestive and Kidney Diseases (NIDDK); Address: 10 Center Drive; City: Bethesda; State: MD; Zip/postal_code: 20892; Country: USA	ftp://ftp.ncbi.nlm.nih.gov/geo/samples/GSM416nnn/GSM416897/suppl/GSM416897.CEL.gz	45101	1	not.included
90	380948	P28 Rorb-/-;CrxpNrl retina, biological rep4	GSM416898	GSE16585	GPL1261	Public on Oct 19 2009	2009-06-12	2009-10-19	RNA	P28 Rorb-/-;CrxpNrl retina	Mus musculus	age: P28; tissue: retina; genotype: Rorb-/-;CrxpNrl	total RNA	biotin	NA	Each sample consists of 2 retina from one mouse and was snap frozen on dry ice. Total RNA was isolated with Trizol (Invitrogen).	5ug of total RNA was used as the starting material for GeneChip One-Cycle Target Labeling and Control Reagents (Affymetrix).	NA	NA	NA	NA	NA	NA	NA	NA	15ug of biotinylated-cRNA was hybridized to GeneChip Mouse Genome 430 2.0 arrays according to GeneChip Expression Analysis Techinical Manual (Affymetrix, P/N 701021 Rev. 5).	2 retina from one mouse	The Robust Multichip Average (RMA) method was used for background correction, quantile normalization, and summarization of expression scores.	Name: Douglas Forrest; Email: forrestd@niddk.nih.gov; Phone: 301-594-6170; Fax: 301-451-7848; Department: Clinical Endocrinology Branch; Institute: National Institute of Diabetes and Digestive and Kidney Diseases (NIDDK); Address: 10 Center Drive; City: Bethesda; State: MD; Zip/postal_code: 20892; Country: USA	ftp://ftp.ncbi.nlm.nih.gov/geo/samples/GSM416nnn/GSM416898/suppl/GSM416898.CEL.gz	45101	1	not.included
91	499837	P1-control-ex1	GSM544741	GSE21900	GPL1261	Public on May 18 2011	2010-05-19	2011-05-18	RNA	P1 retinas of control mice	Mus musculus	tissue: retina; genotype: otx2 flox/flox; Crx-Cre- (control); time: P1	total RNA	biotin	NA	The mouse retinas were dissected using forceps.; Total RNA (5 ug) of the retina was isolated using TRIzol reagent (Invitrogen) and converted to cDNA using One-Cycle cDNA synthesis kit (Affymetrix) according to the manufactureâ€™s instruction.	Biotin-labeled cRNA was prepared using IVT labeling kit.	NA	NA	NA	NA	NA	NA	NA	NA	cRNA was hybridized to GeneChip mouse genome 430 2.0 arrayin Hybridization Oven 640. GeneChips were washed and stained in the Affymetrix Fluidics Station 450	Gene expression data from the control retina at P1	Signal intensity was determined using GeneChip Operating Software 1.4.	Name: Takahisa Furukawa; Laboratory: Furukawa Lab; Department: Developmental Biology; Institute: Osaka Bioscience Institute; Address: 6-2-4 Furuedai; City: Suita; State: Osaka; Zip/postal_code: 565-0874; Country: Japan	ftp://ftp.ncbi.nlm.nih.gov/geo/samples/GSM544nnn/GSM544741/suppl/GSM544741_P1-ex1-WT.CEL.gz	45101	1	whole.retina
92	499838	P1-control-ex2	GSM544742	GSE21900	GPL1261	Public on May 18 2011	2010-05-19	2011-05-18	RNA	P1 retinas of control mice	Mus musculus	tissue: retina; genotype: otx2 flox/flox; Crx-Cre- (control); time: P1	total RNA	biotin	NA	The mouse retinas were dissected using forceps.; Total RNA (5 ug) of the retina was isolated using TRIzol reagent (Invitrogen) and converted to cDNA using One-Cycle cDNA synthesis kit (Affymetrix) according to the manufactureâ€™s instruction.	Biotin-labeled cRNA was prepared using IVT labeling kit.	NA	NA	NA	NA	NA	NA	NA	NA	cRNA was hybridized to GeneChip mouse genome 430 2.0 arrayin Hybridization Oven 640. GeneChips were washed and stained in the Affymetrix Fluidics Station 450	Gene expression data from the control retina at P1	Signal intensity was determined using GeneChip Operating Software 1.4.	Name: Takahisa Furukawa; Laboratory: Furukawa Lab; Department: Developmental Biology; Institute: Osaka Bioscience Institute; Address: 6-2-4 Furuedai; City: Suita; State: Osaka; Zip/postal_code: 565-0874; Country: Japan	ftp://ftp.ncbi.nlm.nih.gov/geo/samples/GSM544nnn/GSM544742/suppl/GSM544742_P1-ex2-WT.CEL.gz	45101	1	whole.retina
93	499839	P1-control-ex3	GSM544743	GSE21900	GPL1261	Public on May 18 2011	2010-05-19	2011-05-18	RNA	P1 retinas of control mice	Mus musculus	tissue: retina; genotype: otx2 flox/flox; Crx-Cre- (control); time: P1	total RNA	biotin	NA	The mouse retinas were dissected using forceps.; Total RNA (5 ug) of the retina was isolated using TRIzol reagent (Invitrogen) and converted to cDNA using One-Cycle cDNA synthesis kit (Affymetrix) according to the manufactureâ€™s instruction.	Biotin-labeled cRNA was prepared using IVT labeling kit.	NA	NA	NA	NA	NA	NA	NA	NA	cRNA was hybridized to GeneChip mouse genome 430 2.0 arrayin Hybridization Oven 640. GeneChips were washed and stained in the Affymetrix Fluidics Station 450	Gene expression data from the Otx2 CKO retina at P1	Signal intensity was determined using GeneChip Operating Software 1.4.	Name: Takahisa Furukawa; Laboratory: Furukawa Lab; Department: Developmental Biology; Institute: Osaka Bioscience Institute; Address: 6-2-4 Furuedai; City: Suita; State: Osaka; Zip/postal_code: 565-0874; Country: Japan	ftp://ftp.ncbi.nlm.nih.gov/geo/samples/GSM544nnn/GSM544743/suppl/GSM544743_P1-ex3-WT.CEL.gz	45101	1	whole.retina
94	499840	P1-Otx2-CKO-ex1	GSM544744	GSE21900	GPL1261	Public on May 18 2011	2010-05-19	2011-05-18	RNA	P1 retinas of Otx2 CKO mice	Mus musculus	tissue: retina; genotype: otx2 flox/flox; Crx-Cre+; time: P1	total RNA	biotin	NA	The mouse retinas were dissected using forceps.; Total RNA (5 ug) of the retina was isolated using TRIzol reagent (Invitrogen) and converted to cDNA using One-Cycle cDNA synthesis kit (Affymetrix) according to the manufactureâ€™s instruction.	Biotin-labeled cRNA was prepared using IVT labeling kit.	NA	NA	NA	NA	NA	NA	NA	NA	cRNA was hybridized to GeneChip mouse genome 430 2.0 arrayin Hybridization Oven 640. GeneChips were washed and stained in the Affymetrix Fluidics Station 450	Gene expression data from the control retina at P1	Signal intensity was determined using GeneChip Operating Software 1.4.	Name: Takahisa Furukawa; Laboratory: Furukawa Lab; Department: Developmental Biology; Institute: Osaka Bioscience Institute; Address: 6-2-4 Furuedai; City: Suita; State: Osaka; Zip/postal_code: 565-0874; Country: Japan	ftp://ftp.ncbi.nlm.nih.gov/geo/samples/GSM544nnn/GSM544744/suppl/GSM544744_P1-ex1-CKO.CEL.gz	45101	1	not.included
95	499841	P1-Otx2-CKO-ex2	GSM544745	GSE21900	GPL1261	Public on May 18 2011	2010-05-19	2011-05-18	RNA	P1 retinas of Otx2 CKO mice	Mus musculus	tissue: retina; genotype: otx2 flox/flox; Crx-Cre+; time: P1	total RNA	biotin	NA	The mouse retinas were dissected using forceps.; Total RNA (5 ug) of the retina was isolated using TRIzol reagent (Invitrogen) and converted to cDNA using One-Cycle cDNA synthesis kit (Affymetrix) according to the manufactureâ€™s instruction.	Biotin-labeled cRNA was prepared using IVT labeling kit.	NA	NA	NA	NA	NA	NA	NA	NA	cRNA was hybridized to GeneChip mouse genome 430 2.0 arrayin Hybridization Oven 640. GeneChips were washed and stained in the Affymetrix Fluidics Station 450	Gene expression data from the control retina at P1	Signal intensity was determined using GeneChip Operating Software 1.4.	Name: Takahisa Furukawa; Laboratory: Furukawa Lab; Department: Developmental Biology; Institute: Osaka Bioscience Institute; Address: 6-2-4 Furuedai; City: Suita; State: Osaka; Zip/postal_code: 565-0874; Country: Japan	ftp://ftp.ncbi.nlm.nih.gov/geo/samples/GSM544nnn/GSM544745/suppl/GSM544745_P1-ex2-CKO.CEL.gz	45101	1	not.included
96	499842	P1-Otx2-CKO-ex3	GSM544746	GSE21900	GPL1261	Public on May 18 2011	2010-05-19	2011-05-18	RNA	P1 retinas of Otx2 CKO mice	Mus musculus	tissue: retina; genotype: otx2 flox/flox; Crx-Cre+; time: P1	total RNA	biotin	NA	The mouse retinas were dissected using forceps.; Total RNA (5 ug) of the retina was isolated using TRIzol reagent (Invitrogen) and converted to cDNA using One-Cycle cDNA synthesis kit (Affymetrix) according to the manufactureâ€™s instruction.	Biotin-labeled cRNA was prepared using IVT labeling kit.	NA	NA	NA	NA	NA	NA	NA	NA	cRNA was hybridized to GeneChip mouse genome 430 2.0 arrayin Hybridization Oven 640. GeneChips were washed and stained in the Affymetrix Fluidics Station 450	Gene expression data from the control retina at P1	Signal intensity was determined using GeneChip Operating Software 1.4.	Name: Takahisa Furukawa; Laboratory: Furukawa Lab; Department: Developmental Biology; Institute: Osaka Bioscience Institute; Address: 6-2-4 Furuedai; City: Suita; State: Osaka; Zip/postal_code: 565-0874; Country: Japan	ftp://ftp.ncbi.nlm.nih.gov/geo/samples/GSM544nnn/GSM544746/suppl/GSM544746_P1-ex3-CKO.CEL.gz	45101	1	not.included
97	499843	P12-control-ex1	GSM544747	GSE21900	GPL1261	Public on May 18 2011	2010-05-19	2011-05-18	RNA	P12 retinas of control mice	Mus musculus	tissue: retina; genotype: otx2 flox/flox; Crx-Cre- (control); time: P12	total RNA	biotin	NA	The mouse retinas were dissected using forceps.; Total RNA (5 ug) of the retina was isolated using TRIzol reagent (Invitrogen) and converted to cDNA using One-Cycle cDNA synthesis kit (Affymetrix) according to the manufactureâ€™s instruction.	Biotin-labeled cRNA was prepared using IVT labeling kit.	NA	NA	NA	NA	NA	NA	NA	NA	cRNA was hybridized to GeneChip mouse genome 430 2.0 arrayin Hybridization Oven 640. GeneChips were washed and stained in the Affymetrix Fluidics Station 450	Gene expression data from the control retina at P12	Signal intensity was determined using GeneChip Operating Software 1.4.	Name: Takahisa Furukawa; Laboratory: Furukawa Lab; Department: Developmental Biology; Institute: Osaka Bioscience Institute; Address: 6-2-4 Furuedai; City: Suita; State: Osaka; Zip/postal_code: 565-0874; Country: Japan	ftp://ftp.ncbi.nlm.nih.gov/geo/samples/GSM544nnn/GSM544747/suppl/GSM544747_P12_ex1_WT.CEL.gz	45101	1	whole.retina
98	499844	P12-control-ex2	GSM544748	GSE21900	GPL1261	Public on May 18 2011	2010-05-19	2011-05-18	RNA	P12 retinas of control mice	Mus musculus	tissue: retina; genotype: otx2 flox/flox; Crx-Cre- (control); time: P12	total RNA	biotin	NA	The mouse retinas were dissected using forceps.; Total RNA (5 ug) of the retina was isolated using TRIzol reagent (Invitrogen) and converted to cDNA using One-Cycle cDNA synthesis kit (Affymetrix) according to the manufactureâ€™s instruction.	Biotin-labeled cRNA was prepared using IVT labeling kit.	NA	NA	NA	NA	NA	NA	NA	NA	cRNA was hybridized to GeneChip mouse genome 430 2.0 arrayin Hybridization Oven 640. GeneChips were washed and stained in the Affymetrix Fluidics Station 450	Gene expression data from the control retina at P12	Signal intensity was determined using GeneChip Operating Software 1.4.	Name: Takahisa Furukawa; Laboratory: Furukawa Lab; Department: Developmental Biology; Institute: Osaka Bioscience Institute; Address: 6-2-4 Furuedai; City: Suita; State: Osaka; Zip/postal_code: 565-0874; Country: Japan	ftp://ftp.ncbi.nlm.nih.gov/geo/samples/GSM544nnn/GSM544748/suppl/GSM544748_P12-ex2-WT.CEL.gz	45101	1	whole.retina
99	499845	P12-control-ex3	GSM544749	GSE21900	GPL1261	Public on May 18 2011	2010-05-19	2011-05-18	RNA	P12 retinas of control mice	Mus musculus	tissue: retina; genotype: otx2 flox/flox; Crx-Cre- (control); time: P12	total RNA	biotin	NA	The mouse retinas were dissected using forceps.; Total RNA (5 ug) of the retina was isolated using TRIzol reagent (Invitrogen) and converted to cDNA using One-Cycle cDNA synthesis kit (Affymetrix) according to the manufactureâ€™s instruction.	Biotin-labeled cRNA was prepared using IVT labeling kit.	NA	NA	NA	NA	NA	NA	NA	NA	cRNA was hybridized to GeneChip mouse genome 430 2.0 arrayin Hybridization Oven 640. GeneChips were washed and stained in the Affymetrix Fluidics Station 450	Gene expression data from the Otx2 CKO retina at P12	Signal intensity was determined using GeneChip Operating Software 1.4.	Name: Takahisa Furukawa; Laboratory: Furukawa Lab; Department: Developmental Biology; Institute: Osaka Bioscience Institute; Address: 6-2-4 Furuedai; City: Suita; State: Osaka; Zip/postal_code: 565-0874; Country: Japan	ftp://ftp.ncbi.nlm.nih.gov/geo/samples/GSM544nnn/GSM544749/suppl/GSM544749_P12-ex3-WT.CEL.gz	45101	1	whole.retina
100	499846	P12-Otx2-CKO-ex1	GSM544750	GSE21900	GPL1261	Public on May 18 2011	2010-05-19	2011-05-18	RNA	P12 retinas of Otx2 CKO mice	Mus musculus	tissue: retina; genotype: otx2 flox/flox; Crx-Cre+; time: P12	total RNA	biotin	NA	The mouse retinas were dissected using forceps.; Total RNA (5 ug) of the retina was isolated using TRIzol reagent (Invitrogen) and converted to cDNA using One-Cycle cDNA synthesis kit (Affymetrix) according to the manufactureâ€™s instruction.	Biotin-labeled cRNA was prepared using IVT labeling kit.	NA	NA	NA	NA	NA	NA	NA	NA	cRNA was hybridized to GeneChip mouse genome 430 2.0 arrayin Hybridization Oven 640. GeneChips were washed and stained in the Affymetrix Fluidics Station 450	Gene expression data from the control retina at P12	Signal intensity was determined using GeneChip Operating Software 1.4.	Name: Takahisa Furukawa; Laboratory: Furukawa Lab; Department: Developmental Biology; Institute: Osaka Bioscience Institute; Address: 6-2-4 Furuedai; City: Suita; State: Osaka; Zip/postal_code: 565-0874; Country: Japan	ftp://ftp.ncbi.nlm.nih.gov/geo/samples/GSM544nnn/GSM544750/suppl/GSM544750_P12-ex1-CKO.CEL.gz	45101	1	not.included
101	499847	P12-Otx2-CKO-ex2	GSM544751	GSE21900	GPL1261	Public on May 18 2011	2010-05-19	2011-05-18	RNA	P12 retinas of Otx2 CKO mice	Mus musculus	tissue: retina; genotype: otx2 flox/flox; Crx-Cre+; time: P12	total RNA	biotin	NA	The mouse retinas were dissected using forceps.; Total RNA (5 ug) of the retina was isolated using TRIzol reagent (Invitrogen) and converted to cDNA using One-Cycle cDNA synthesis kit (Affymetrix) according to the manufactureâ€™s instruction.	Biotin-labeled cRNA was prepared using IVT labeling kit.	NA	NA	NA	NA	NA	NA	NA	NA	cRNA was hybridized to GeneChip mouse genome 430 2.0 arrayin Hybridization Oven 640. GeneChips were washed and stained in the Affymetrix Fluidics Station 450	Gene expression data from the control retina at P12	Signal intensity was determined using GeneChip Operating Software 1.4.	Name: Takahisa Furukawa; Laboratory: Furukawa Lab; Department: Developmental Biology; Institute: Osaka Bioscience Institute; Address: 6-2-4 Furuedai; City: Suita; State: Osaka; Zip/postal_code: 565-0874; Country: Japan	ftp://ftp.ncbi.nlm.nih.gov/geo/samples/GSM544nnn/GSM544751/suppl/GSM544751_P12-ex2-CKO.CEL.gz	45101	1	not.included
102	499848	P12-Otx2-CKO-ex3	GSM544752	GSE21900	GPL1261	Public on May 18 2011	2010-05-19	2011-05-18	RNA	P12 retinas of Otx2 CKO mice	Mus musculus	tissue: retina; genotype: otx2 flox/flox; Crx-Cre+; time: P12	total RNA	biotin	NA	The mouse retinas were dissected using forceps.; Total RNA (5 ug) of the retina was isolated using TRIzol reagent (Invitrogen) and converted to cDNA using One-Cycle cDNA synthesis kit (Affymetrix) according to the manufactureâ€™s instruction.	Biotin-labeled cRNA was prepared using IVT labeling kit.	NA	NA	NA	NA	NA	NA	NA	NA	cRNA was hybridized to GeneChip mouse genome 430 2.0 arrayin Hybridization Oven 640. GeneChips were washed and stained in the Affymetrix Fluidics Station 450	Gene expression data from the control retina at P12	Signal intensity was determined using GeneChip Operating Software 1.4.	Name: Takahisa Furukawa; Laboratory: Furukawa Lab; Department: Developmental Biology; Institute: Osaka Bioscience Institute; Address: 6-2-4 Furuedai; City: Suita; State: Osaka; Zip/postal_code: 565-0874; Country: Japan	ftp://ftp.ncbi.nlm.nih.gov/geo/samples/GSM544nnn/GSM544752/suppl/GSM544752_P12-ex3-CKO.CEL.gz	45101	1	not.included
103	500271	C57Bl/6 P21, wildtype retina, 1	GSM545221	GSE21944	GPL1261	Public on Jul 02 2010	2010-05-19	2010-07-02	RNA	C57Bl/6 P21, wildtype, 2 pooled retinas	Mus musculus	strain: C57Bl/6 wildtype; sex: Mixed; age: P21	total RNA	Biotin	Microdissection into RNAlater (Ambion).	RNeasy Kit (QIAGEN).	One round amplification protocol for total RNA following Affymetrixâ€™ specifications using T7 promoter oligo dT primer for cDNA synthesis, and ENZO IVT kit (www.affymetrix.com, GeneChip Expression Analysis, Technical Manual).	NA	NA	NA	NA	NA	NA	NA	NA	16hrs at 45Â° C with rotation (60rpm) as described by Affymetrix in their GeneChip Expression Analysis Technical Manual.	Hybridization was performed by the Johns Hopkins Medical Institutions Microarray Core Facility.	Image analysis using GCOS 1.4, using MAS 5.0 algorithm and manufacturerâ€™s specifications. Global scaling of images to a target intensity of 150.	Name: Seth Blackshaw; Email: sblack@jhmi.edu; Department: Neuroscience ; Institute: The Johns Hopkins University; Address: 733 N. Broadway, Suite 351; City: Baltimore; State: MD; Zip/postal_code: 21205; Country: USA	ftp://ftp.ncbi.nlm.nih.gov/geo/samples/GSM545nnn/GSM545221/suppl/GSM545221.CEL.gz; ftp://ftp.ncbi.nlm.nih.gov/geo/samples/GSM545nnn/GSM545221/suppl/GSM545221.CHP.gz	45101	1	whole.retina
104	500773	C57Bl/6 P21, wildtype retina, 2	GSM545855	GSE21944	GPL1261	Public on Jul 02 2010	2010-05-20	2010-07-02	RNA	C57Bl/6 P21, wildtype, 2 pooled retinas	Mus musculus	strain: C57Bl/6 wildtype; sex: Mixed; age: P21	total RNA	Biotin	Microdissection into RNAlater (Ambion).	RNeasy Kit (QIAGEN).	One round amplification protocol for total RNA following Affymetrixâ€™ specifications using T7 promoter oligo dT primer for cDNA synthesis, and ENZO IVT kit (www.affymetrix.com, GeneChip Expression Analysis, Technical Manual).	NA	NA	NA	NA	NA	NA	NA	NA	16hrs at 45Â° C with rotation (60rpm) as described by Affymetrix in their GeneChip Expression Analysis Technical Manual.	Hybridization was performed by the Johns Hopkins Medical Institutions Microarray Core Facility.	Image analysis using GCOS 1.4, using MAS 5.0 algorithm and manufacturerâ€™s specifications. Global scaling of images to a target intensity of 150.	Name: Seth Blackshaw; Email: sblack@jhmi.edu; Department: Neuroscience ; Institute: The Johns Hopkins University; Address: 733 N. Broadway, Suite 351; City: Baltimore; State: MD; Zip/postal_code: 21205; Country: USA	ftp://ftp.ncbi.nlm.nih.gov/geo/samples/GSM545nnn/GSM545855/suppl/GSM545855.CEL.gz; ftp://ftp.ncbi.nlm.nih.gov/geo/samples/GSM545nnn/GSM545855/suppl/GSM545855.CHP.gz	45101	1	whole.retina
105	500774	C57Bl/6 x Sv129 P21, ERRÎ² -/- knockout retina, 1	GSM545856	GSE21944	GPL1261	Public on Jul 02 2010	2010-05-20	2010-07-02	RNA	C57Bl/6 x Sv129 P21, ERRÎ² -/- knockout, 2 pooled retinas	Mus musculus	strain: C57Bl/6 x Sv129 ERRÎ² -/- knockout; sex: Mixed; age: P21	total RNA	Biotin	Microdissection into RNAlater (Ambion).	RNeasy Kit (QIAGEN).	One round amplification protocol for total RNA following Affymetrixâ€™ specifications using T7 promoter oligo dT primer for cDNA synthesis, and ENZO IVT kit (www.affymetrix.com, GeneChip Expression Analysis, Technical Manual).	NA	NA	NA	NA	NA	NA	NA	NA	16hrs at 45Â° C with rotation (60rpm) as described by Affymetrix in their GeneChip Expression Analysis Technical Manual.	Hybridization was performed by the Johns Hopkins Medical Institutions Microarray Core Facility.	Image analysis using GCOS 1.4, using MAS 5.0 algorithm and manufacturerâ€™s specifications. Global scaling of images to a target intensity of 150.	Name: Seth Blackshaw; Email: sblack@jhmi.edu; Department: Neuroscience ; Institute: The Johns Hopkins University; Address: 733 N. Broadway, Suite 351; City: Baltimore; State: MD; Zip/postal_code: 21205; Country: USA	ftp://ftp.ncbi.nlm.nih.gov/geo/samples/GSM545nnn/GSM545856/suppl/GSM545856.CEL.gz; ftp://ftp.ncbi.nlm.nih.gov/geo/samples/GSM545nnn/GSM545856/suppl/GSM545856.CHP.gz	45101	1	not.included
106	500775	C57Bl/6 x Sv129 P21, ERRÎ² -/- knockout retina, 2	GSM545857	GSE21944	GPL1261	Public on Jul 02 2010	2010-05-20	2010-07-02	RNA	C57Bl/6 x Sv129 P21, ERRÎ² -/- knockout, 2 pooled retinas	Mus musculus	strain: C57Bl/6 x Sv129 ERRÎ² -/- knockout; sex: Mixed; age: P21	total RNA	Biotin	Microdissection into RNAlater (Ambion).	RNeasy Kit (QIAGEN).	One round amplification protocol for total RNA following Affymetrixâ€™ specifications using T7 promoter oligo dT primer for cDNA synthesis, and ENZO IVT kit (www.affymetrix.com, GeneChip Expression Analysis, Technical Manual).	NA	NA	NA	NA	NA	NA	NA	NA	16hrs at 45Â° C with rotation (60rpm) as described by Affymetrix in their GeneChip Expression Analysis Technical Manual.	Hybridization was performed by the Johns Hopkins Medical Institutions Microarray Core Facility.	Image analysis using GCOS 1.4, using MAS 5.0 algorithm and manufacturerâ€™s specifications. Global scaling of images to a target intensity of 150.	Name: Seth Blackshaw; Email: sblack@jhmi.edu; Department: Neuroscience ; Institute: The Johns Hopkins University; Address: 733 N. Broadway, Suite 351; City: Baltimore; State: MD; Zip/postal_code: 21205; Country: USA	ftp://ftp.ncbi.nlm.nih.gov/geo/samples/GSM545nnn/GSM545857/suppl/GSM545857.CEL.gz; ftp://ftp.ncbi.nlm.nih.gov/geo/samples/GSM545nnn/GSM545857/suppl/GSM545857.CHP.gz	45101	1	not.included
107	500776	C57Bl/6 x Sv129 P21, ERRÎ² -/- knockout retina, 3	GSM545858	GSE21944	GPL1261	Public on Jul 02 2010	2010-05-20	2010-07-02	RNA	C57Bl/6 x Sv129 P21, ERRÎ² -/- knockout, 2 pooled retinas	Mus musculus	strain: C57Bl/6 x Sv129 ERRÎ² -/- knockout; sex: Mixed; age: P21	total RNA	Biotin	Microdissection into RNAlater (Ambion).	RNeasy Kit (QIAGEN).	One round amplification protocol for total RNA following Affymetrixâ€™ specifications using T7 promoter oligo dT primer for cDNA synthesis, and ENZO IVT kit (www.affymetrix.com, GeneChip Expression Analysis, Technical Manual).	NA	NA	NA	NA	NA	NA	NA	NA	16hrs at 45Â° C with rotation (60rpm) as described by Affymetrix in their GeneChip Expression Analysis Technical Manual.	Hybridization was performed by the Johns Hopkins Medical Institutions Microarray Core Facility.	Image analysis using GCOS 1.4, using MAS 5.0 algorithm and manufacturerâ€™s specifications. Global scaling of images to a target intensity of 150.	Name: Seth Blackshaw; Email: sblack@jhmi.edu; Department: Neuroscience ; Institute: The Johns Hopkins University; Address: 733 N. Broadway, Suite 351; City: Baltimore; State: MD; Zip/postal_code: 21205; Country: USA	ftp://ftp.ncbi.nlm.nih.gov/geo/samples/GSM545nnn/GSM545858/suppl/GSM545858.CEL.gz; ftp://ftp.ncbi.nlm.nih.gov/geo/samples/GSM545nnn/GSM545858/suppl/GSM545858.CHP.gz	45101	1	not.included
108	500777	C57Bl/6 P21, wildtype retina, 3	GSM545859	GSE21944	GPL1261	Public on Jul 02 2010	2010-05-20	2010-07-02	RNA	C57Bl/6 P21, wildtype, 2 pooled retinas	Mus musculus	strain: C57Bl/6 wildtype; sex: Mixed; age: P21	total RNA	Biotin	Microdissection into RNAlater (Ambion).	RNeasy Kit (QIAGEN).	One round amplification protocol for total RNA following Affymetrixâ€™ specifications using T7 promoter oligo dT primer for cDNA synthesis, and ENZO IVT kit (www.affymetrix.com, GeneChip Expression Analysis, Technical Manual).	NA	NA	NA	NA	NA	NA	NA	NA	16hrs at 45Â° C with rotation (60rpm) as described by Affymetrix in their GeneChip Expression Analysis Technical Manual.	Hybridization was performed by the Johns Hopkins Medical Institutions Microarray Core Facility.	Image analysis using GCOS 1.4, using MAS 5.0 algorithm and manufacturerâ€™s specifications. Global scaling of images to a target intensity of 150.	Name: Seth Blackshaw; Email: sblack@jhmi.edu; Department: Neuroscience ; Institute: The Johns Hopkins University; Address: 733 N. Broadway, Suite 351; City: Baltimore; State: MD; Zip/postal_code: 21205; Country: USA	ftp://ftp.ncbi.nlm.nih.gov/geo/samples/GSM545nnn/GSM545859/suppl/GSM545859.CEL.gz; ftp://ftp.ncbi.nlm.nih.gov/geo/samples/GSM545nnn/GSM545859/suppl/GSM545859.CHP.gz	45101	1	whole.retina
109	517872	Picciotto b2 -/- retina P4, mouse A	GSM564240	GSE22824	GPL1261	Public on Jan 01 2011	2010-07-08	2011-01-01	RNA	Postnatal day 4 Chrnb2 mutant male mus musculus (Picciotto) left and right total retinas. C57BL/6J mice mutated in the Chrnb2 gene, see reference under Description field	Mus musculus	strain: C57BL/6J; developmental stage: Postnatal day 4 (before retinal ganglion cell segregation in lateral geniculate nucleus); genotype/variation: Chrnb2-/- (verified by PCR from tail snip, parents are Picciotto mutant); mutant allele: Picciotto; gender: male; tissue: left and right total retinas; mouse: A	total RNA	biotin	NA	RNA was extracted using Qiagen RNeasy Micro Kit reagents and protocols	Samples were labeled using the Ambion MessageAmp II-Biotin Enhanced kit and protocols	NA	NA	NA	NA	NA	NA	NA	NA	10 ug of fragmented LGN aRNA or 20 ug of retinal RNA were hybridized on the Affymetrix Fluidics Station 450 following the protocol in the GeneChip Expression Analysis Technical Manual	Pic P4 A retina; Picciotto, M. R., M. Zoli, et al. (1995). Abnormal avoidance learning in mice lacking functional high-affinity nicotine receptor in the brain. Nature 374(6517): 65-7.	dCHIP, quantile normalization, PM/MM difference model	Name: Carol,Marie,Rubin; Email: c_rubin@sbcglobal.net; Department: Neurobiology Physiology and Behavior; Institute: University of California, Davis; Address: One Shields Avenue; City: Davis; State: CA; Zip/postal_code: 95616; Country: USA	ftp://ftp.ncbi.nlm.nih.gov/geo/samples/GSM564nnn/GSM564240/suppl/GSM564240.CEL.gz	45037	1	not.included
110	517873	Picciotto b2 -/- retina P4, mouse B	GSM564241	GSE22824	GPL1261	Public on Jan 01 2011	2010-07-08	2011-01-01	RNA	Postnatal day 4 Chrnb2 mutant male mus musculus (Picciotto) left and right total retinas. C57BL/6J mice mutated in the Chrnb2 gene, see reference under Description field	Mus musculus	strain: C57BL/6J; developmental stage: Postnatal day 4 (before retinal ganglion cell segregation in lateral geniculate nucleus); genotype/variation: Chrnb2-/- (verified by PCR from tail snip, parents are Picciotto mutant); mutant allele: Picciotto; gender: male; tissue: left and right total retinas; mouse: B	total RNA	biotin	NA	RNA was extracted using Qiagen RNeasy Micro Kit reagents and protocols	Samples were labeled using the Ambion MessageAmp II-Biotin Enhanced kit and protocols	NA	NA	NA	NA	NA	NA	NA	NA	10 ug of fragmented LGN aRNA or 20 ug of retinal RNA were hybridized on the Affymetrix Fluidics Station 450 following the protocol in the GeneChip Expression Analysis Technical Manual	Pic P4 B retina; Picciotto, M. R., M. Zoli, et al. (1995). Abnormal avoidance learning in mice lacking functional high-affinity nicotine receptor in the brain. Nature 374(6517): 65-7.	dCHIP, quantile normalization, PM/MM difference model	Name: Carol,Marie,Rubin; Email: c_rubin@sbcglobal.net; Department: Neurobiology Physiology and Behavior; Institute: University of California, Davis; Address: One Shields Avenue; City: Davis; State: CA; Zip/postal_code: 95616; Country: USA	ftp://ftp.ncbi.nlm.nih.gov/geo/samples/GSM564nnn/GSM564241/suppl/GSM564241.CEL.gz	45037	1	not.included
111	517874	Picciotto b2 -/- retina P4, mouse C	GSM564242	GSE22824	GPL1261	Public on Jan 01 2011	2010-07-08	2011-01-01	RNA	Postnatal day 4 Chrnb2 mutant male mus musculus (Picciotto) left and right total retinas. C57BL/6J mice mutated in the Chrnb2 gene, see reference under Description field	Mus musculus	strain: C57BL/6J; developmental stage: Postnatal day 4 (before retinal ganglion cell segregation in lateral geniculate nucleus); genotype/variation: Chrnb2-/- (verified by PCR from tail snip, parents are Picciotto mutant); mutant allele: Picciotto; gender: male; tissue: left and right total retinas; mouse: C	total RNA	biotin	NA	RNA was extracted using Qiagen RNeasy Micro Kit reagents and protocols	Samples were labeled using the Ambion MessageAmp II-Biotin Enhanced kit and protocols	NA	NA	NA	NA	NA	NA	NA	NA	10 ug of fragmented LGN aRNA or 20 ug of retinal RNA were hybridized on the Affymetrix Fluidics Station 450 following the protocol in the GeneChip Expression Analysis Technical Manual	Pic P4 C retina; Picciotto, M. R., M. Zoli, et al. (1995). Abnormal avoidance learning in mice lacking functional high-affinity nicotine receptor in the brain. Nature 374(6517): 65-7.	dCHIP, quantile normalization, PM/MM difference model	Name: Carol,Marie,Rubin; Email: c_rubin@sbcglobal.net; Department: Neurobiology Physiology and Behavior; Institute: University of California, Davis; Address: One Shields Avenue; City: Davis; State: CA; Zip/postal_code: 95616; Country: USA	ftp://ftp.ncbi.nlm.nih.gov/geo/samples/GSM564nnn/GSM564242/suppl/GSM564242.CEL.gz	45037	1	not.included
112	517875	Xu b2 -/- retina P4, mouse A	GSM564243	GSE22824	GPL1261	Public on Jan 01 2011	2010-07-08	2011-01-01	RNA	Postnatal day 4 Chrnb2 mutant male mus musculus (Xu) left and right total retinas. C57BL/6J mice mutated in the Chrnb2 gene, see reference under Description field	Mus musculus	strain: C57BL/6J; developmental stage: Postnatal day 4 (before retinal ganglion cell segregation in lateral geniculate nucleus); genotype/variation: Chrnb2-/- (verified by PCR from tail snip, parents are Xu mutant); mutant allele: Xu; gender: male; tissue: left and right total retinas; mouse: A	total RNA	biotin	NA	RNA was extracted using Qiagen RNeasy Micro Kit reagents and protocols	Samples were labeled using the Ambion MessageAmp II-Biotin Enhanced kit and protocols	NA	NA	NA	NA	NA	NA	NA	NA	10 ug of fragmented LGN aRNA or 20 ug of retinal RNA were hybridized on the Affymetrix Fluidics Station 450 following the protocol in the GeneChip Expression Analysis Technical Manual	Xu P4 A retina; Xu, W., A. Orr-Urtreger, et al. (1999). Multiorgan autonomic dysfunction in mice lacking the beta2 and the beta4 subunits of neuronal nicotinic acetylcholine receptors. J Neurosci 19(21): 9298-305.	dCHIP, quantile normalization, PM/MM difference model	Name: Carol,Marie,Rubin; Email: c_rubin@sbcglobal.net; Department: Neurobiology Physiology and Behavior; Institute: University of California, Davis; Address: One Shields Avenue; City: Davis; State: CA; Zip/postal_code: 95616; Country: USA	ftp://ftp.ncbi.nlm.nih.gov/geo/samples/GSM564nnn/GSM564243/suppl/GSM564243.CEL.gz	45037	1	not.included
113	517876	Xu b2 -/- retina P4, mouse B	GSM564244	GSE22824	GPL1261	Public on Jan 01 2011	2010-07-08	2011-01-01	RNA	Postnatal day 4 Chrnb2 mutant male mus musculus (Xu) left and right total retinas. C57BL/6J mice mutated in the Chrnb2 gene, see reference under Description field	Mus musculus	strain: C57BL/6J; developmental stage: Postnatal day 4 (before retinal ganglion cell segregation in lateral geniculate nucleus); genotype/variation: Chrnb2-/- (verified by PCR from tail snip, parents are Xu mutant); mutant allele: Xu; gender: male; tissue: left and right total retinas; mouse: B	total RNA	biotin	NA	RNA was extracted using Qiagen RNeasy Micro Kit reagents and protocols	Samples were labeled using the Ambion MessageAmp II-Biotin Enhanced kit and protocols	NA	NA	NA	NA	NA	NA	NA	NA	10 ug of fragmented LGN aRNA or 20 ug of retinal RNA were hybridized on the Affymetrix Fluidics Station 450 following the protocol in the GeneChip Expression Analysis Technical Manual	Xu P4 B retina; Xu, W., A. Orr-Urtreger, et al. (1999). Multiorgan autonomic dysfunction in mice lacking the beta2 and the beta4 subunits of neuronal nicotinic acetylcholine receptors. J Neurosci 19(21): 9298-305.	dCHIP, quantile normalization, PM/MM difference model	Name: Carol,Marie,Rubin; Email: c_rubin@sbcglobal.net; Department: Neurobiology Physiology and Behavior; Institute: University of California, Davis; Address: One Shields Avenue; City: Davis; State: CA; Zip/postal_code: 95616; Country: USA	ftp://ftp.ncbi.nlm.nih.gov/geo/samples/GSM564nnn/GSM564244/suppl/GSM564244.CEL.gz	45037	1	not.included
114	517877	Xu b2 -/- retina P4, mouse C	GSM564245	GSE22824	GPL1261	Public on Jan 01 2011	2010-07-08	2011-01-01	RNA	Postnatal day 4 Chrnb2 mutant male mus musculus (Xu) left and right total retinas. C57BL/6J mice mutated in the Chrnb2 gene, see reference under Description field	Mus musculus	strain: C57BL/6J; developmental stage: Postnatal day 4 (before retinal ganglion cell segregation in lateral geniculate nucleus); genotype/variation: Chrnb2-/- (verified by PCR from tail snip, parents are Xu mutant); mutant allele: Xu; gender: male; tissue: left and right total retinas; mouse: C	total RNA	biotin	NA	RNA was extracted using Qiagen RNeasy Micro Kit reagents and protocols	Samples were labeled using the Ambion MessageAmp II-Biotin Enhanced kit and protocols	NA	NA	NA	NA	NA	NA	NA	NA	10 ug of fragmented LGN aRNA or 20 ug of retinal RNA were hybridized on the Affymetrix Fluidics Station 450 following the protocol in the GeneChip Expression Analysis Technical Manual	Xu P4 C retina; Xu, W., A. Orr-Urtreger, et al. (1999). Multiorgan autonomic dysfunction in mice lacking the beta2 and the beta4 subunits of neuronal nicotinic acetylcholine receptors. J Neurosci 19(21): 9298-305.	dCHIP, quantile normalization, PM/MM difference model	Name: Carol,Marie,Rubin; Email: c_rubin@sbcglobal.net; Department: Neurobiology Physiology and Behavior; Institute: University of California, Davis; Address: One Shields Avenue; City: Davis; State: CA; Zip/postal_code: 95616; Country: USA	ftp://ftp.ncbi.nlm.nih.gov/geo/samples/GSM564nnn/GSM564245/suppl/GSM564245.CEL.gz	45037	1	not.included
115	517878	Wild type retina P4, mouse A	GSM564246	GSE22824	GPL1261	Public on Jan 01 2011	2010-07-08	2011-01-01	RNA	Postnatal day 4 wild type (C57BL/6J) male mus musculus left and right total retinas	Mus musculus	strain: C57BL/6J; developmental stage: Postnatal day 4 (before retinal ganglion cell segregation in lateral geniculate nucleus); genotype/variation: wild type; gender: male; tissue: left and right total retinas; mouse: A	total RNA	biotin	NA	RNA was extracted using Qiagen RNeasy Micro Kit reagents and protocols	Samples were labeled using the Ambion MessageAmp II-Biotin Enhanced kit and protocols	NA	NA	NA	NA	NA	NA	NA	NA	10 ug of fragmented LGN aRNA or 20 ug of retinal RNA were hybridized on the Affymetrix Fluidics Station 450 following the protocol in the GeneChip Expression Analysis Technical Manual	WT P4 A retina; C57BL/6J	dCHIP, quantile normalization, PM/MM difference model	Name: Carol,Marie,Rubin; Email: c_rubin@sbcglobal.net; Department: Neurobiology Physiology and Behavior; Institute: University of California, Davis; Address: One Shields Avenue; City: Davis; State: CA; Zip/postal_code: 95616; Country: USA	ftp://ftp.ncbi.nlm.nih.gov/geo/samples/GSM564nnn/GSM564246/suppl/GSM564246.CEL.gz	45037	1	whole.retina
116	517879	Wild type retina P4, mouse B	GSM564247	GSE22824	GPL1261	Public on Jan 01 2011	2010-07-08	2011-01-01	RNA	Postnatal day 4 wild type (C57BL/6J) male mus musculus left and right total retinas	Mus musculus	strain: C57BL/6J; developmental stage: Postnatal day 4 (before retinal ganglion cell segregation in lateral geniculate nucleus); genotype/variation: wild type; gender: male; tissue: left and right total retinas; mouse: B	total RNA	biotin	NA	RNA was extracted using Qiagen RNeasy Micro Kit reagents and protocols	Samples were labeled using the Ambion MessageAmp II-Biotin Enhanced kit and protocols	NA	NA	NA	NA	NA	NA	NA	NA	10 ug of fragmented LGN aRNA or 20 ug of retinal RNA were hybridized on the Affymetrix Fluidics Station 450 following the protocol in the GeneChip Expression Analysis Technical Manual	WT P4 B retina; C57BL/6J	dCHIP, quantile normalization, PM/MM difference model	Name: Carol,Marie,Rubin; Email: c_rubin@sbcglobal.net; Department: Neurobiology Physiology and Behavior; Institute: University of California, Davis; Address: One Shields Avenue; City: Davis; State: CA; Zip/postal_code: 95616; Country: USA	ftp://ftp.ncbi.nlm.nih.gov/geo/samples/GSM564nnn/GSM564247/suppl/GSM564247.CEL.gz	45037	1	whole.retina
117	517880	Wild type retina P4, mouse C	GSM564248	GSE22824	GPL1261	Public on Jan 01 2011	2010-07-08	2011-01-01	RNA	Postnatal day 4 wild type (C57BL/6J) male mus musculus left and right total retinas	Mus musculus	strain: C57BL/6J; developmental stage: Postnatal day 4 (before retinal ganglion cell segregation in lateral geniculate nucleus); genotype/variation: wild type; gender: male; tissue: left and right total retinas; mouse: C	total RNA	biotin	NA	RNA was extracted using Qiagen RNeasy Micro Kit reagents and protocols	Samples were labeled using the Ambion MessageAmp II-Biotin Enhanced kit and protocols	NA	NA	NA	NA	NA	NA	NA	NA	10 ug of fragmented LGN aRNA or 20 ug of retinal RNA were hybridized on the Affymetrix Fluidics Station 450 following the protocol in the GeneChip Expression Analysis Technical Manual	WT P4 C retina; C57BL/6J	dCHIP, quantile normalization, PM/MM difference model	Name: Carol,Marie,Rubin; Email: c_rubin@sbcglobal.net; Department: Neurobiology Physiology and Behavior; Institute: University of California, Davis; Address: One Shields Avenue; City: Davis; State: CA; Zip/postal_code: 95616; Country: USA	ftp://ftp.ncbi.nlm.nih.gov/geo/samples/GSM564nnn/GSM564248/suppl/GSM564248.CEL.gz	45037	1	whole.retina
118	517881	Picciotto b2 -/-LGN P4, mouse B	GSM564249	GSE22824	GPL1261	Public on Jan 01 2011	2010-07-08	2011-01-01	RNA	Postnatal day 4 Chrnb2 mutant male mus musculus (Picciotto) left and right total lateral geniculate nucleus (LGN). C57BL/6J mice mutated in the Chrnb2 gene, see reference under Description field	Mus musculus	strain: C57BL/6J; developmental stage: Postnatal day 4 (before retinal ganglion cell segregation in lateral geniculate nucleus); genotype/variation: Chrnb2-/- (verified by PCR from tail snip, parents are Picciotto mutant); mutant allele: Picciotto; gender: male; tissue: left and right total lateral geniculate nucleus (LGN); mouse: B	total RNA	biotin	NA	RNA was extracted using Qiagen RNeasy Micro Kit reagents and protocols	Samples were labeled using the Ambion MessageAmp II-Biotin Enhanced kit and protocols	NA	NA	NA	NA	NA	NA	NA	NA	10 ug of fragmented LGN aRNA or 20 ug of retinal RNA were hybridized on the Affymetrix Fluidics Station 450 following the protocol in the GeneChip Expression Analysis Technical Manual	Pic P4 B LGN; Picciotto, M. R., M. Zoli, et al. (1995). Abnormal avoidance learning in mice lacking functional high-affinity nicotine receptor in the brain. Nature 374(6517): 65-7.	dCHIP, quantile normalization, PM/MM difference model	Name: Carol,Marie,Rubin; Email: c_rubin@sbcglobal.net; Department: Neurobiology Physiology and Behavior; Institute: University of California, Davis; Address: One Shields Avenue; City: Davis; State: CA; Zip/postal_code: 95616; Country: USA	ftp://ftp.ncbi.nlm.nih.gov/geo/samples/GSM564nnn/GSM564249/suppl/GSM564249.CEL.gz	45037	1	not.included
119	517882	Picciotto b2 -/- LGN P4, mouse C	GSM564250	GSE22824	GPL1261	Public on Jan 01 2011	2010-07-08	2011-01-01	RNA	Postnatal day 4 Chrnb2 mutant male mus musculus (Picciotto) left and right total lateral geniculate nucleus (LGN). C57BL/6J mice mutated in the Chrnb2 gene, see reference under Description field	Mus musculus	strain: C57BL/6J; developmental stage: Postnatal day 4 (before retinal ganglion cell segregation in lateral geniculate nucleus); genotype/variation: Chrnb2-/- (verified by PCR from tail snip, parents are Picciotto mutant); mutant allele: Picciotto; gender: male; tissue: left and right total lateral geniculate nucleus (LGN); mouse: C	total RNA	biotin	NA	RNA was extracted using Qiagen RNeasy Micro Kit reagents and protocols	Samples were labeled using the Ambion MessageAmp II-Biotin Enhanced kit and protocols	NA	NA	NA	NA	NA	NA	NA	NA	10 ug of fragmented LGN aRNA or 20 ug of retinal RNA were hybridized on the Affymetrix Fluidics Station 450 following the protocol in the GeneChip Expression Analysis Technical Manual	Pic P4 C LGN; Picciotto, M. R., M. Zoli, et al. (1995). Abnormal avoidance learning in mice lacking functional high-affinity nicotine receptor in the brain. Nature 374(6517): 65-7.	dCHIP, quantile normalization, PM/MM difference model	Name: Carol,Marie,Rubin; Email: c_rubin@sbcglobal.net; Department: Neurobiology Physiology and Behavior; Institute: University of California, Davis; Address: One Shields Avenue; City: Davis; State: CA; Zip/postal_code: 95616; Country: USA	ftp://ftp.ncbi.nlm.nih.gov/geo/samples/GSM564nnn/GSM564250/suppl/GSM564250.CEL.gz	45037	1	not.included
120	517883	Picciotto b2 -/- LGN P4, mouse D	GSM564251	GSE22824	GPL1261	Public on Jan 01 2011	2010-07-08	2011-01-01	RNA	Postnatal day 4 Chrnb2 mutant male mus musculus (Picciotto) left and right total lateral geniculate nucleus (LGN). C57BL/6J mice mutated in the Chrnb2 gene, see reference under Description field	Mus musculus	strain: C57BL/6J; developmental stage: Postnatal day 4 (before retinal ganglion cell segregation in lateral geniculate nucleus); genotype/variation: Chrnb2-/- (verified by PCR from tail snip, parents are Picciotto mutant); mutant allele: Picciotto; gender: male; tissue: left and right total lateral geniculate nucleus (LGN); mouse: D	total RNA	biotin	NA	RNA was extracted using Qiagen RNeasy Micro Kit reagents and protocols	Samples were labeled using the Ambion MessageAmp II-Biotin Enhanced kit and protocols	NA	NA	NA	NA	NA	NA	NA	NA	10 ug of fragmented LGN aRNA or 20 ug of retinal RNA were hybridized on the Affymetrix Fluidics Station 450 following the protocol in the GeneChip Expression Analysis Technical Manual	Pic P4 D LGN; Picciotto, M. R., M. Zoli, et al. (1995). Abnormal avoidance learning in mice lacking functional high-affinity nicotine receptor in the brain. Nature 374(6517): 65-7.	dCHIP, quantile normalization, PM/MM difference model	Name: Carol,Marie,Rubin; Email: c_rubin@sbcglobal.net; Department: Neurobiology Physiology and Behavior; Institute: University of California, Davis; Address: One Shields Avenue; City: Davis; State: CA; Zip/postal_code: 95616; Country: USA	ftp://ftp.ncbi.nlm.nih.gov/geo/samples/GSM564nnn/GSM564251/suppl/GSM564251.CEL.gz	45037	1	not.included
121	517884	Xu b2 -/- LGN P4, mouse A	GSM564252	GSE22824	GPL1261	Public on Jan 01 2011	2010-07-08	2011-01-01	RNA	Postnatal day 4 Chrnb2 mutant male mus musculus (Xu) left and right total lateral geniculate nucleus (LGN). C57BL/6J mice mutated in the Chrnb2 gene, see reference under Description field	Mus musculus	strain: C57BL/6J; developmental stage: Postnatal day 4 (before retinal ganglion cell segregation in lateral geniculate nucleus); genotype/variation: Chrnb2-/- (verified by PCR from tail snip, parents are Xu mutant); mutant allele: Xu; gender: male; tissue: left and right total lateral geniculate nucleus (LGN); mouse: A	total RNA	biotin	NA	RNA was extracted using Qiagen RNeasy Micro Kit reagents and protocols	Samples were labeled using the Ambion MessageAmp II-Biotin Enhanced kit and protocols	NA	NA	NA	NA	NA	NA	NA	NA	10 ug of fragmented LGN aRNA or 20 ug of retinal RNA were hybridized on the Affymetrix Fluidics Station 450 following the protocol in the GeneChip Expression Analysis Technical Manual	Xu P4 A LGN; Xu, W., A. Orr-Urtreger, et al. (1999). Multiorgan autonomic dysfunction in mice lacking the beta2 and the beta4 subunits of neuronal nicotinic acetylcholine receptors. J Neurosci 19(21): 9298-305.	dCHIP, quantile normalization, PM/MM difference model	Name: Carol,Marie,Rubin; Email: c_rubin@sbcglobal.net; Department: Neurobiology Physiology and Behavior; Institute: University of California, Davis; Address: One Shields Avenue; City: Davis; State: CA; Zip/postal_code: 95616; Country: USA	ftp://ftp.ncbi.nlm.nih.gov/geo/samples/GSM564nnn/GSM564252/suppl/GSM564252.CEL.gz	45037	1	not.included
122	517885	Xu b2 -/- LGN P4, mouse B	GSM564253	GSE22824	GPL1261	Public on Jan 01 2011	2010-07-08	2011-01-01	RNA	Postnatal day 4 Chrnb2 mutant male mus musculus (Xu) left and right total lateral geniculate nucleus (LGN). C57BL/6J mice mutated in the Chrnb2 gene, see reference under Description field	Mus musculus	strain: C57BL/6J; developmental stage: Postnatal day 4 (before retinal ganglion cell segregation in lateral geniculate nucleus); genotype/variation: Chrnb2-/- (verified by PCR from tail snip, parents are Xu mutant); mutant allele: Xu; gender: male; tissue: left and right total lateral geniculate nucleus (LGN); mouse: B	total RNA	biotin	NA	RNA was extracted using Qiagen RNeasy Micro Kit reagents and protocols	Samples were labeled using the Ambion MessageAmp II-Biotin Enhanced kit and protocols	NA	NA	NA	NA	NA	NA	NA	NA	10 ug of fragmented LGN aRNA or 20 ug of retinal RNA were hybridized on the Affymetrix Fluidics Station 450 following the protocol in the GeneChip Expression Analysis Technical Manual	Xu P4 B LGN; Xu, W., A. Orr-Urtreger, et al. (1999). Multiorgan autonomic dysfunction in mice lacking the beta2 and the beta4 subunits of neuronal nicotinic acetylcholine receptors. J Neurosci 19(21): 9298-305.	dCHIP, quantile normalization, PM/MM difference model	Name: Carol,Marie,Rubin; Email: c_rubin@sbcglobal.net; Department: Neurobiology Physiology and Behavior; Institute: University of California, Davis; Address: One Shields Avenue; City: Davis; State: CA; Zip/postal_code: 95616; Country: USA	ftp://ftp.ncbi.nlm.nih.gov/geo/samples/GSM564nnn/GSM564253/suppl/GSM564253.CEL.gz	45037	1	not.included
123	517886	Xu b2 -/- LGN P4, mouse C	GSM564254	GSE22824	GPL1261	Public on Jan 01 2011	2010-07-08	2011-01-01	RNA	Postnatal day 4 Chrnb2 mutant male mus musculus (Xu) left and right total lateral geniculate nucleus (LGN). C57BL/6J mice mutated in the Chrnb2 gene, see reference under Description field	Mus musculus	strain: C57BL/6J; developmental stage: Postnatal day 4 (before retinal ganglion cell segregation in lateral geniculate nucleus); genotype/variation: Chrnb2-/- (verified by PCR from tail snip, parents are Xu mutant); mutant allele: Xu; gender: male; tissue: left and right total lateral geniculate nucleus (LGN); mouse: C	total RNA	biotin	NA	RNA was extracted using Qiagen RNeasy Micro Kit reagents and protocols	Samples were labeled using the Ambion MessageAmp II-Biotin Enhanced kit and protocols	NA	NA	NA	NA	NA	NA	NA	NA	10 ug of fragmented LGN aRNA or 20 ug of retinal RNA were hybridized on the Affymetrix Fluidics Station 450 following the protocol in the GeneChip Expression Analysis Technical Manual	Xu P4 C LGN; Xu, W., A. Orr-Urtreger, et al. (1999). Multiorgan autonomic dysfunction in mice lacking the beta2 and the beta4 subunits of neuronal nicotinic acetylcholine receptors. J Neurosci 19(21): 9298-305.	dCHIP, quantile normalization, PM/MM difference model	Name: Carol,Marie,Rubin; Email: c_rubin@sbcglobal.net; Department: Neurobiology Physiology and Behavior; Institute: University of California, Davis; Address: One Shields Avenue; City: Davis; State: CA; Zip/postal_code: 95616; Country: USA	ftp://ftp.ncbi.nlm.nih.gov/geo/samples/GSM564nnn/GSM564254/suppl/GSM564254.CEL.gz	45037	1	not.included
124	517887	Wild type LGN P4, mouse A	GSM564255	GSE22824	GPL1261	Public on Jan 01 2011	2010-07-08	2011-01-01	RNA	Postnatal day 4 wild type (C57BL/6J) male mus musculus left and right total lateral geniculate nucleus (LGN)	Mus musculus	strain: C57BL/6J; developmental stage: Postnatal day 4 (before retinal ganglion cell segregation in lateral geniculate nucleus); genotype/variation: wild type; gender: male; tissue: left and right total lateral geniculate nucleus (LGN); mouse: A	total RNA	biotin	NA	RNA was extracted using Qiagen RNeasy Micro Kit reagents and protocols	Samples were labeled using the Ambion MessageAmp II-Biotin Enhanced kit and protocols	NA	NA	NA	NA	NA	NA	NA	NA	10 ug of fragmented LGN aRNA or 20 ug of retinal RNA were hybridized on the Affymetrix Fluidics Station 450 following the protocol in the GeneChip Expression Analysis Technical Manual	WT P4 A LGN; C57BL/6J	dCHIP, quantile normalization, PM/MM difference model	Name: Carol,Marie,Rubin; Email: c_rubin@sbcglobal.net; Department: Neurobiology Physiology and Behavior; Institute: University of California, Davis; Address: One Shields Avenue; City: Davis; State: CA; Zip/postal_code: 95616; Country: USA	ftp://ftp.ncbi.nlm.nih.gov/geo/samples/GSM564nnn/GSM564255/suppl/GSM564255.CEL.gz	45037	1	not.included
125	517888	Wild type LGN P4, mouse D	GSM564256	GSE22824	GPL1261	Public on Jan 01 2011	2010-07-08	2011-01-01	RNA	Postnatal day 4 wild type (C57BL/6J) male mus musculus left and right total lateral geniculate nucleus (LGN)	Mus musculus	strain: C57BL/6J; developmental stage: Postnatal day 4 (before retinal ganglion cell segregation in lateral geniculate nucleus); genotype/variation: wild type; gender: male; tissue: left and right total lateral geniculate nucleus (LGN); mouse: D	total RNA	biotin	NA	RNA was extracted using Qiagen RNeasy Micro Kit reagents and protocols	Samples were labeled using the Ambion MessageAmp II-Biotin Enhanced kit and protocols	NA	NA	NA	NA	NA	NA	NA	NA	10 ug of fragmented LGN aRNA or 20 ug of retinal RNA were hybridized on the Affymetrix Fluidics Station 450 following the protocol in the GeneChip Expression Analysis Technical Manual	WT P4 D LGN; C57BL/6J	dCHIP, quantile normalization, PM/MM difference model	Name: Carol,Marie,Rubin; Email: c_rubin@sbcglobal.net; Department: Neurobiology Physiology and Behavior; Institute: University of California, Davis; Address: One Shields Avenue; City: Davis; State: CA; Zip/postal_code: 95616; Country: USA	ftp://ftp.ncbi.nlm.nih.gov/geo/samples/GSM564nnn/GSM564256/suppl/GSM564256.CEL.gz	45037	1	not.included
126	517889	Wild type LGN P4, mouse E	GSM564257	GSE22824	GPL1261	Public on Jan 01 2011	2010-07-08	2011-01-01	RNA	Postnatal day 4 wild type (C57BL/6J) male mus musculus left and right total lateral geniculate nucleus (LGN)	Mus musculus	strain: C57BL/6J; developmental stage: Postnatal day 4 (before retinal ganglion cell segregation in lateral geniculate nucleus); genotype/variation: wild type; gender: male; tissue: left and right total lateral geniculate nucleus (LGN); mouse: E	total RNA	biotin	NA	RNA was extracted using Qiagen RNeasy Micro Kit reagents and protocols	Samples were labeled using the Ambion MessageAmp II-Biotin Enhanced kit and protocols	NA	NA	NA	NA	NA	NA	NA	NA	10 ug of fragmented LGN aRNA or 20 ug of retinal RNA were hybridized on the Affymetrix Fluidics Station 450 following the protocol in the GeneChip Expression Analysis Technical Manual	WT P4 E LGN; C57BL/6J	dCHIP, quantile normalization, PM/MM difference model	Name: Carol,Marie,Rubin; Email: c_rubin@sbcglobal.net; Department: Neurobiology Physiology and Behavior; Institute: University of California, Davis; Address: One Shields Avenue; City: Davis; State: CA; Zip/postal_code: 95616; Country: USA	ftp://ftp.ncbi.nlm.nih.gov/geo/samples/GSM564nnn/GSM564257/suppl/GSM564257.CEL.gz	45037	1	not.included
127	517890	Picciotto b2 -/- retina adult, mouse 1542	GSM564258	GSE22824	GPL1261	Public on Jan 01 2011	2010-07-08	2011-01-01	RNA	Adult Chrnb2 mutant male mus musculus (Picciotto) left and right total retinas. C57BL/6J mice mutated in the Chrnb2 gene, see reference under Description field	Mus musculus	strain: C57BL/6J; developmental stage: Adult (after retinal ganglion cell segregation in lateral geniculate nucleus is complete); genotype/variation: Chrnb2-/- (verified by PCR from tail snip, parents are Picciotto mutant); mutant allele: Picciotto; gender: male; tissue: left and right total retinas; mouse: 1542	total RNA	biotin	NA	RNA was extracted using Qiagen RNeasy Micro Kit reagents and protocols	Samples were labeled using the Ambion MessageAmp II-Biotin Enhanced kit and protocols	NA	NA	NA	NA	NA	NA	NA	NA	10 ug of fragmented LGN aRNA or 20 ug of retinal RNA were hybridized on the Affymetrix Fluidics Station 450 following the protocol in the GeneChip Expression Analysis Technical Manual	Pic Adult 1542 retina; Picciotto, M. R., M. Zoli, et al. (1995). Abnormal avoidance learning in mice lacking functional high-affinity nicotine receptor in the brain. Nature 374(6517): 65-7.	dCHIP, quantile normalization, PM/MM difference model	Name: Carol,Marie,Rubin; Email: c_rubin@sbcglobal.net; Department: Neurobiology Physiology and Behavior; Institute: University of California, Davis; Address: One Shields Avenue; City: Davis; State: CA; Zip/postal_code: 95616; Country: USA	ftp://ftp.ncbi.nlm.nih.gov/geo/samples/GSM564nnn/GSM564258/suppl/GSM564258.CEL.gz	45037	1	not.included
128	517891	Picciotto b2 -/- retina adult, mouse 1543	GSM564259	GSE22824	GPL1261	Public on Jan 01 2011	2010-07-08	2011-01-01	RNA	Adult Chrnb2 mutant male mus musculus (Picciotto) left and right total retinas. C57BL/6J mice mutated in the Chrnb2 gene, see reference under Description field	Mus musculus	strain: C57BL/6J; developmental stage: Adult (after retinal ganglion cell segregation in lateral geniculate nucleus is complete); genotype/variation: Chrnb2-/- (verified by PCR from tail snip, parents are Picciotto mutant); mutant allele: Picciotto; gender: male; tissue: left and right total retinas; mouse: 1543	total RNA	biotin	NA	RNA was extracted using Qiagen RNeasy Micro Kit reagents and protocols	Samples were labeled using the Ambion MessageAmp II-Biotin Enhanced kit and protocols	NA	NA	NA	NA	NA	NA	NA	NA	10 ug of fragmented LGN aRNA or 20 ug of retinal RNA were hybridized on the Affymetrix Fluidics Station 450 following the protocol in the GeneChip Expression Analysis Technical Manual	Pic Adult 1543 retina; Picciotto, M. R., M. Zoli, et al. (1995). Abnormal avoidance learning in mice lacking functional high-affinity nicotine receptor in the brain. Nature 374(6517): 65-7.	dCHIP, quantile normalization, PM/MM difference model	Name: Carol,Marie,Rubin; Email: c_rubin@sbcglobal.net; Department: Neurobiology Physiology and Behavior; Institute: University of California, Davis; Address: One Shields Avenue; City: Davis; State: CA; Zip/postal_code: 95616; Country: USA	ftp://ftp.ncbi.nlm.nih.gov/geo/samples/GSM564nnn/GSM564259/suppl/GSM564259.CEL.gz	45037	1	not.included
129	517892	Xu b2 -/- retina adult, mouse 77	GSM564260	GSE22824	GPL1261	Public on Jan 01 2011	2010-07-08	2011-01-01	RNA	Adult Chrnb2 mutant male mus musculus (Xu) left and right total retinas. C57BL/6J mice mutated in the Chrnb2 gene, see reference under Description field	Mus musculus	strain: C57BL/6J; developmental stage: Adult (after retinal ganglion cell segregation in lateral geniculate nucleus is complete); genotype/variation: Chrnb2-/- (verified by PCR from tail snip, parents are Xu mutant); mutant allele: Xu; gender: male; tissue: left and right total retinas; mouse: 77	total RNA	biotin	NA	RNA was extracted using Qiagen RNeasy Micro Kit reagents and protocols	Samples were labeled using the Ambion MessageAmp II-Biotin Enhanced kit and protocols	NA	NA	NA	NA	NA	NA	NA	NA	10 ug of fragmented LGN aRNA or 20 ug of retinal RNA were hybridized on the Affymetrix Fluidics Station 450 following the protocol in the GeneChip Expression Analysis Technical Manual	Xu Adult 77 retina; Xu, W., A. Orr-Urtreger, et al. (1999). Multiorgan autonomic dysfunction in mice lacking the beta2 and the beta4 subunits of neuronal nicotinic acetylcholine receptors. J Neurosci 19(21): 9298-305.	dCHIP, quantile normalization, PM/MM difference model	Name: Carol,Marie,Rubin; Email: c_rubin@sbcglobal.net; Department: Neurobiology Physiology and Behavior; Institute: University of California, Davis; Address: One Shields Avenue; City: Davis; State: CA; Zip/postal_code: 95616; Country: USA	ftp://ftp.ncbi.nlm.nih.gov/geo/samples/GSM564nnn/GSM564260/suppl/GSM564260.CEL.gz	45037	1	not.included
130	517893	Xu b2 -/- retina adult, mouse 78	GSM564261	GSE22824	GPL1261	Public on Jan 01 2011	2010-07-08	2011-01-01	RNA	Adult Chrnb2 mutant male mus musculus (Xu) left and right total retinas. C57BL/6J mice mutated in the Chrnb2 gene, see reference under Description field	Mus musculus	strain: C57BL/6J; developmental stage: Adult (after retinal ganglion cell segregation in lateral geniculate nucleus is complete); genotype/variation: Chrnb2-/- (verified by PCR from tail snip, parents are Xu mutant); mutant allele: Xu; gender: male; tissue: left and right total retinas; mouse: 78	total RNA	biotin	NA	RNA was extracted using Qiagen RNeasy Micro Kit reagents and protocols	Samples were labeled using the Ambion MessageAmp II-Biotin Enhanced kit and protocols	NA	NA	NA	NA	NA	NA	NA	NA	10 ug of fragmented LGN aRNA or 20 ug of retinal RNA were hybridized on the Affymetrix Fluidics Station 450 following the protocol in the GeneChip Expression Analysis Technical Manual	Xu Adult 78 retina; Xu, W., A. Orr-Urtreger, et al. (1999). Multiorgan autonomic dysfunction in mice lacking the beta2 and the beta4 subunits of neuronal nicotinic acetylcholine receptors. J Neurosci 19(21): 9298-305.	dCHIP, quantile normalization, PM/MM difference model	Name: Carol,Marie,Rubin; Email: c_rubin@sbcglobal.net; Department: Neurobiology Physiology and Behavior; Institute: University of California, Davis; Address: One Shields Avenue; City: Davis; State: CA; Zip/postal_code: 95616; Country: USA	ftp://ftp.ncbi.nlm.nih.gov/geo/samples/GSM564nnn/GSM564261/suppl/GSM564261.CEL.gz	45037	1	not.included
131	517894	Wild type retina adult, mouse 748	GSM564262	GSE22824	GPL1261	Public on Jan 01 2011	2010-07-08	2011-01-01	RNA	Adult wild type (C57BL/6J) male mus musculus left and right total retinas	Mus musculus	strain: C57BL/6J; developmental stage: Adult (after retinal ganglion cell segregation in lateral geniculate nucleus is complete); genotype/variation: wild type; gender: male; tissue: left and right total retinas; mouse: 748	total RNA	biotin	NA	RNA was extracted using Qiagen RNeasy Micro Kit reagents and protocols	Samples were labeled using the Ambion MessageAmp II-Biotin Enhanced kit and protocols	NA	NA	NA	NA	NA	NA	NA	NA	10 ug of fragmented LGN aRNA or 20 ug of retinal RNA were hybridized on the Affymetrix Fluidics Station 450 following the protocol in the GeneChip Expression Analysis Technical Manual	WT Adult 748 retina; C57BL/6J	dCHIP, quantile normalization, PM/MM difference model	Name: Carol,Marie,Rubin; Email: c_rubin@sbcglobal.net; Department: Neurobiology Physiology and Behavior; Institute: University of California, Davis; Address: One Shields Avenue; City: Davis; State: CA; Zip/postal_code: 95616; Country: USA	ftp://ftp.ncbi.nlm.nih.gov/geo/samples/GSM564nnn/GSM564262/suppl/GSM564262.CEL.gz	45037	1	not.included
132	517895	Wild type retina adult, mouse 763	GSM564263	GSE22824	GPL1261	Public on Jan 01 2011	2010-07-08	2011-01-01	RNA	Adult wild type (C57BL/6J) male mus musculus left and right total retinas	Mus musculus	strain: C57BL/6J; developmental stage: Adult (after retinal ganglion cell segregation in lateral geniculate nucleus is complete); genotype/variation: wild type; gender: male; tissue: left and right total retinas; mouse: 763	total RNA	biotin	NA	RNA was extracted using Qiagen RNeasy Micro Kit reagents and protocols	Samples were labeled using the Ambion MessageAmp II-Biotin Enhanced kit and protocols	NA	NA	NA	NA	NA	NA	NA	NA	10 ug of fragmented LGN aRNA or 20 ug of retinal RNA were hybridized on the Affymetrix Fluidics Station 450 following the protocol in the GeneChip Expression Analysis Technical Manual	WT Adult 763 retina; C57BL/6J	dCHIP, quantile normalization, PM/MM difference model	Name: Carol,Marie,Rubin; Email: c_rubin@sbcglobal.net; Department: Neurobiology Physiology and Behavior; Institute: University of California, Davis; Address: One Shields Avenue; City: Davis; State: CA; Zip/postal_code: 95616; Country: USA	ftp://ftp.ncbi.nlm.nih.gov/geo/samples/GSM564nnn/GSM564263/suppl/GSM564263.CEL.gz	45037	1	not.included
133	528444	Mouse retina_Control_ rep1	GSM575233	GSE23437	GPL1261	Public on Aug 06 2010	2010-08-05	2010-08-05	RNA	retina, no hyperoxia	Mus musculus	strain: C57BL/6J; tissue: Retina; age: Adult P80 - 120	total RNA	Biotin	Animals were placed in an oxygen chamber and exposed to 75% oxygen for a period of either 3, 7 or 14 days.	Total RNA was extracted from each retinal biopsy using Trizol and chloroform to separate the RNA from other cell components. The RNA was then purified and isolated using RNAqueous-Micro RNA isolation kit (Ambion, Inc., Austin, TX). In some cases where genomic DNA contamination was a concern, the RNA was DNAse treated.	Biotin-labeled cRNA was prepared according to the standard Affymetrix protocol from 500ng total RNA (Affymetrix manual, P/N 702646 Rev. 7).	NA	NA	NA	NA	NA	NA	NA	NA	Standard Affymetrix protocols were followed in the hybridisation, blocking and washing (GeneChipÂ® Expression Analysis Technical Manual (P/N 702232 Rev. 3)).	Gene expression data from mouse retina exposued to normal oxygen levels	RMA normalization performed in GeneSpring v 7.3.1. Log2 RMA data was quantile transformed to median sample baseline.	Name: Riccardo Natoli; Email: riccardo.natoli@anu.edu.au; Phone: + 61 2 6125 8559; Fax: + 61 2 6125 8680; Laboratory: Provis Lab; Department: CMBE; Institute: ANU; Address: Sullivans Creek Road; City: Acton; State: ACT; Zip/postal_code: 2617; Country: Australia	ftp://ftp.ncbi.nlm.nih.gov/geo/samples/GSM575nnn/GSM575233/suppl/GSM575233.CEL.gz; ftp://ftp.ncbi.nlm.nih.gov/geo/samples/GSM575nnn/GSM575233/suppl/GSM575233.CHP.gz	45101	1	whole.retina
134	528445	Mouse retina_Control_ rep2	GSM575234	GSE23437	GPL1261	Public on Aug 06 2010	2010-08-05	2010-08-05	RNA	retina, no hyperoxia	Mus musculus	strain: C57BL/6J; tissue: Retina; age: Adult P80 - 120	total RNA	Biotin	Animals were placed in an oxygen chamber and exposed to 75% oxygen for a period of either 3, 7 or 14 days.	Total RNA was extracted from each retinal biopsy using Trizol and chloroform to separate the RNA from other cell components. The RNA was then purified and isolated using RNAqueous-Micro RNA isolation kit (Ambion, Inc., Austin, TX). In some cases where genomic DNA contamination was a concern, the RNA was DNAse treated.	Biotin-labeled cRNA was prepared according to the standard Affymetrix protocol from 500ng total RNA (Affymetrix manual, P/N 702646 Rev. 7).	NA	NA	NA	NA	NA	NA	NA	NA	Standard Affymetrix protocols were followed in the hybridisation, blocking and washing (GeneChipÂ® Expression Analysis Technical Manual (P/N 702232 Rev. 3)).	Gene expression data from mouse retina exposued to normal oxygen levels	RMA normalization performed in GeneSpring v 7.3.1. Log2 RMA data was quantile transformed to median sample baseline.	Name: Riccardo Natoli; Email: riccardo.natoli@anu.edu.au; Phone: + 61 2 6125 8559; Fax: + 61 2 6125 8680; Laboratory: Provis Lab; Department: CMBE; Institute: ANU; Address: Sullivans Creek Road; City: Acton; State: ACT; Zip/postal_code: 2617; Country: Australia	ftp://ftp.ncbi.nlm.nih.gov/geo/samples/GSM575nnn/GSM575234/suppl/GSM575234.CEL.gz; ftp://ftp.ncbi.nlm.nih.gov/geo/samples/GSM575nnn/GSM575234/suppl/GSM575234.CHP.gz	45101	1	whole.retina
135	528446	Mouse retina_3 days_ rep1	GSM575235	GSE23437	GPL1261	Public on Aug 06 2010	2010-08-05	2010-08-05	RNA	retina, 3 days exposure to 75% hyperoxia	Mus musculus	strain: C57BL/6J; tissue: Retina; age: Adult P80 - 120	total RNA	Biotin	Animals were placed in an oxygen chamber and exposed to 75% oxygen for a period of either 3, 7 or 14 days.	Total RNA was extracted from each retinal biopsy using Trizol and chloroform to separate the RNA from other cell components. The RNA was then purified and isolated using RNAqueous-Micro RNA isolation kit (Ambion, Inc., Austin, TX). In some cases where genomic DNA contamination was a concern, the RNA was DNAse treated.	Biotin-labeled cRNA was prepared according to the standard Affymetrix protocol from 500ng total RNA (Affymetrix manual, P/N 702646 Rev. 7).	NA	NA	NA	NA	NA	NA	NA	NA	Standard Affymetrix protocols were followed in the hybridisation, blocking and washing (GeneChipÂ® Expression Analysis Technical Manual (P/N 702232 Rev. 3)).	Gene expression data from mouse retina exposued to 3 days 75% hyperoxia	RMA normalization performed in GeneSpring v 7.3.1. Log2 RMA data was quantile transformed to median sample baseline.	Name: Riccardo Natoli; Email: riccardo.natoli@anu.edu.au; Phone: + 61 2 6125 8559; Fax: + 61 2 6125 8680; Laboratory: Provis Lab; Department: CMBE; Institute: ANU; Address: Sullivans Creek Road; City: Acton; State: ACT; Zip/postal_code: 2617; Country: Australia	ftp://ftp.ncbi.nlm.nih.gov/geo/samples/GSM575nnn/GSM575235/suppl/GSM575235.CEL.gz; ftp://ftp.ncbi.nlm.nih.gov/geo/samples/GSM575nnn/GSM575235/suppl/GSM575235.CHP.gz	45101	1	not.included
136	528447	Mouse retina_3 days_ rep2	GSM575236	GSE23437	GPL1261	Public on Aug 06 2010	2010-08-05	2010-08-05	RNA	retina, 3 days exposure to 75% hyperoxia	Mus musculus	strain: C57BL/6J; tissue: Retina; age: Adult P80 - 120	total RNA	Biotin	Animals were placed in an oxygen chamber and exposed to 75% oxygen for a period of either 3, 7 or 14 days.	Total RNA was extracted from each retinal biopsy using Trizol and chloroform to separate the RNA from other cell components. The RNA was then purified and isolated using RNAqueous-Micro RNA isolation kit (Ambion, Inc., Austin, TX). In some cases where genomic DNA contamination was a concern, the RNA was DNAse treated.	Biotin-labeled cRNA was prepared according to the standard Affymetrix protocol from 500ng total RNA (Affymetrix manual, P/N 702646 Rev. 7).	NA	NA	NA	NA	NA	NA	NA	NA	Standard Affymetrix protocols were followed in the hybridisation, blocking and washing (GeneChipÂ® Expression Analysis Technical Manual (P/N 702232 Rev. 3)).	Gene expression data from mouse retina exposued to 3 days 75% hyperoxia	RMA normalization performed in GeneSpring v 7.3.1. Log2 RMA data was quantile transformed to median sample baseline.	Name: Riccardo Natoli; Email: riccardo.natoli@anu.edu.au; Phone: + 61 2 6125 8559; Fax: + 61 2 6125 8680; Laboratory: Provis Lab; Department: CMBE; Institute: ANU; Address: Sullivans Creek Road; City: Acton; State: ACT; Zip/postal_code: 2617; Country: Australia	ftp://ftp.ncbi.nlm.nih.gov/geo/samples/GSM575nnn/GSM575236/suppl/GSM575236.CEL.gz; ftp://ftp.ncbi.nlm.nih.gov/geo/samples/GSM575nnn/GSM575236/suppl/GSM575236.CHP.gz	45101	1	not.included
137	528448	Mouse retina_7 days_ rep1	GSM575237	GSE23437	GPL1261	Public on Aug 06 2010	2010-08-05	2010-08-05	RNA	retina, 7 days exposure to 75% hyperoxia	Mus musculus	strain: C57BL/6J; tissue: Retina; age: Adult P80 - 120	total RNA	Biotin	Animals were placed in an oxygen chamber and exposed to 75% oxygen for a period of either 3, 7 or 14 days.	Total RNA was extracted from each retinal biopsy using Trizol and chloroform to separate the RNA from other cell components. The RNA was then purified and isolated using RNAqueous-Micro RNA isolation kit (Ambion, Inc., Austin, TX). In some cases where genomic DNA contamination was a concern, the RNA was DNAse treated.	Biotin-labeled cRNA was prepared according to the standard Affymetrix protocol from 500ng total RNA (Affymetrix manual, P/N 702646 Rev. 7).	NA	NA	NA	NA	NA	NA	NA	NA	Standard Affymetrix protocols were followed in the hybridisation, blocking and washing (GeneChipÂ® Expression Analysis Technical Manual (P/N 702232 Rev. 3)).	Gene expression data from mouse retina exposued to 7 days 75% hyperoxia	RMA normalization performed in GeneSpring v 7.3.1. Log2 RMA data was quantile transformed to median sample baseline.	Name: Riccardo Natoli; Email: riccardo.natoli@anu.edu.au; Phone: + 61 2 6125 8559; Fax: + 61 2 6125 8680; Laboratory: Provis Lab; Department: CMBE; Institute: ANU; Address: Sullivans Creek Road; City: Acton; State: ACT; Zip/postal_code: 2617; Country: Australia	ftp://ftp.ncbi.nlm.nih.gov/geo/samples/GSM575nnn/GSM575237/suppl/GSM575237.CEL.gz; ftp://ftp.ncbi.nlm.nih.gov/geo/samples/GSM575nnn/GSM575237/suppl/GSM575237.CHP.gz	45101	1	not.included
138	528449	Mouse retina_7 days_ rep2	GSM575238	GSE23437	GPL1261	Public on Aug 06 2010	2010-08-05	2010-08-05	RNA	retina, 7 days exposure to 75% hyperoxia	Mus musculus	strain: C57BL/6J; tissue: Retina; age: Adult P80 - 120	total RNA	Biotin	Animals were placed in an oxygen chamber and exposed to 75% oxygen for a period of either 3, 7 or 14 days.	Total RNA was extracted from each retinal biopsy using Trizol and chloroform to separate the RNA from other cell components. The RNA was then purified and isolated using RNAqueous-Micro RNA isolation kit (Ambion, Inc., Austin, TX). In some cases where genomic DNA contamination was a concern, the RNA was DNAse treated.	Biotin-labeled cRNA was prepared according to the standard Affymetrix protocol from 500ng total RNA (Affymetrix manual, P/N 702646 Rev. 7).	NA	NA	NA	NA	NA	NA	NA	NA	Standard Affymetrix protocols were followed in the hybridisation, blocking and washing (GeneChipÂ® Expression Analysis Technical Manual (P/N 702232 Rev. 3)).	Gene expression data from mouse retina exposued to 7 days 75% hyperoxia	RMA normalization performed in GeneSpring v 7.3.1. Log2 RMA data was quantile transformed to median sample baseline.	Name: Riccardo Natoli; Email: riccardo.natoli@anu.edu.au; Phone: + 61 2 6125 8559; Fax: + 61 2 6125 8680; Laboratory: Provis Lab; Department: CMBE; Institute: ANU; Address: Sullivans Creek Road; City: Acton; State: ACT; Zip/postal_code: 2617; Country: Australia	ftp://ftp.ncbi.nlm.nih.gov/geo/samples/GSM575nnn/GSM575238/suppl/GSM575238.CEL.gz; ftp://ftp.ncbi.nlm.nih.gov/geo/samples/GSM575nnn/GSM575238/suppl/GSM575238.CHP.gz	45101	1	not.included
139	528450	Mouse retina_14 days_ rep1	GSM575239	GSE23437	GPL1261	Public on Aug 06 2010	2010-08-05	2010-08-05	RNA	retina, 14 days exposure to 75% hyperoxia	Mus musculus	strain: C57BL/6J; tissue: Retina; age: Adult P80 - 120	total RNA	Biotin	Animals were placed in an oxygen chamber and exposed to 75% oxygen for a period of either 3, 7 or 14 days.	Total RNA was extracted from each retinal biopsy using Trizol and chloroform to separate the RNA from other cell components. The RNA was then purified and isolated using RNAqueous-Micro RNA isolation kit (Ambion, Inc., Austin, TX). In some cases where genomic DNA contamination was a concern, the RNA was DNAse treated.	Biotin-labeled cRNA was prepared according to the standard Affymetrix protocol from 500ng total RNA (Affymetrix manual, P/N 702646 Rev. 7).	NA	NA	NA	NA	NA	NA	NA	NA	Standard Affymetrix protocols were followed in the hybridisation, blocking and washing (GeneChipÂ® Expression Analysis Technical Manual (P/N 702232 Rev. 3)).	Gene expression data from mouse retina exposued to 14 days 75% hyperoxia	RMA normalization performed in GeneSpring v 7.3.1. Log2 RMA data was quantile transformed to median sample baseline.	Name: Riccardo Natoli; Email: riccardo.natoli@anu.edu.au; Phone: + 61 2 6125 8559; Fax: + 61 2 6125 8680; Laboratory: Provis Lab; Department: CMBE; Institute: ANU; Address: Sullivans Creek Road; City: Acton; State: ACT; Zip/postal_code: 2617; Country: Australia	ftp://ftp.ncbi.nlm.nih.gov/geo/samples/GSM575nnn/GSM575239/suppl/GSM575239.CEL.gz; ftp://ftp.ncbi.nlm.nih.gov/geo/samples/GSM575nnn/GSM575239/suppl/GSM575239.CHP.gz	45101	1	not.included
140	528451	Mouse retina_14 days_ rep2	GSM575240	GSE23437	GPL1261	Public on Aug 06 2010	2010-08-05	2010-08-05	RNA	retina, 14 days exposure to 75% hyperoxia	Mus musculus	strain: C57BL/6J; tissue: Retina; age: Adult P80 - 120	total RNA	Biotin	Animals were placed in an oxygen chamber and exposed to 75% oxygen for a period of either 3, 7 or 14 days.	Total RNA was extracted from each retinal biopsy using Trizol and chloroform to separate the RNA from other cell components. The RNA was then purified and isolated using RNAqueous-Micro RNA isolation kit (Ambion, Inc., Austin, TX). In some cases where genomic DNA contamination was a concern, the RNA was DNAse treated.	Biotin-labeled cRNA was prepared according to the standard Affymetrix protocol from 500ng total RNA (Affymetrix manual, P/N 702646 Rev. 7).	NA	NA	NA	NA	NA	NA	NA	NA	Standard Affymetrix protocols were followed in the hybridisation, blocking and washing (GeneChipÂ® Expression Analysis Technical Manual (P/N 702232 Rev. 3)).	Gene expression data from mouse retina exposued to 14 days 75% hyperoxia	RMA normalization performed in GeneSpring v 7.3.1. Log2 RMA data was quantile transformed to median sample baseline.	Name: Riccardo Natoli; Email: riccardo.natoli@anu.edu.au; Phone: + 61 2 6125 8559; Fax: + 61 2 6125 8680; Laboratory: Provis Lab; Department: CMBE; Institute: ANU; Address: Sullivans Creek Road; City: Acton; State: ACT; Zip/postal_code: 2617; Country: Australia	ftp://ftp.ncbi.nlm.nih.gov/geo/samples/GSM575nnn/GSM575240/suppl/GSM575240.CEL.gz; ftp://ftp.ncbi.nlm.nih.gov/geo/samples/GSM575nnn/GSM575240/suppl/GSM575240.CHP.gz	45101	1	not.included
141	663217	rhoGFP PN4 retinal cells positive FAC sorted biological repliacte 1	GSM724539	GSE29318	GPL1261	Public on Jul 12 2011	2011-05-16	2011-07-12	RNA	retina of PN4 rhoGFP mice, FAC-sorted	Mus musculus	genotype: rhoGFP; cell type: rhoGFP positive retinal cell; genetic background: C57BL/6J-129/Ola; age: postnatal day 4	total RNA	biotin	NA	RNA was isolated using Qiagen RNeasy Mini Kit according to the manufacturer's instructions.	Biotinylated cRNA were prepared according to Ambion protocol from 200ng total RNA (MessageAmpTM II-Biotin Enhanced Kit, 2009, Ambion).	NA	NA	NA	NA	NA	NA	NA	NA	Following fragmentation, 15 ug of cRNA were hybridized for 16 hr at 45Â°C on Affymetrix Mouse Genome 430 2.0 Array. GeneChips were washed and stained in the Affymetrix Fluidics Station 450.	NA	The data were analyzed with GeneSpring GX 11.0.1 software (Agilent) using normalization algorithm RMA.	Name: Kai Postel; Institute: DFG-Center for Regenerative Therapies Dresden; Address: FiedlerstraÃŸe 42; City: Dresden; Zip/postal_code: 01307; Country: Germany	ftp://ftp.ncbi.nlm.nih.gov/geo/samples/GSM724nnn/GSM724539/suppl/GSM724539_P4_pos_1_Mouse430_2_.CEL.gz	45101	1	photoreceptors
142	663218	rhoGFP PN4 retinal cells positive FAC sorted biological repliacte 2	GSM724540	GSE29318	GPL1261	Public on Jul 12 2011	2011-05-16	2011-07-12	RNA	retina of PN4 rhoGFP mice, FAC-sorted	Mus musculus	genotype: rhoGFP; cell type: rhoGFP positive retinal cell; genetic background: C57BL/6J-129/Ola; age: postnatal day 4	total RNA	biotin	NA	RNA was isolated using Qiagen RNeasy Mini Kit according to the manufacturer's instructions.	Biotinylated cRNA were prepared according to Ambion protocol from 200ng total RNA (MessageAmpTM II-Biotin Enhanced Kit, 2009, Ambion).	NA	NA	NA	NA	NA	NA	NA	NA	Following fragmentation, 15 ug of cRNA were hybridized for 16 hr at 45Â°C on Affymetrix Mouse Genome 430 2.0 Array. GeneChips were washed and stained in the Affymetrix Fluidics Station 450.	NA	The data were analyzed with GeneSpring GX 11.0.1 software (Agilent) using normalization algorithm RMA.	Name: Kai Postel; Institute: DFG-Center for Regenerative Therapies Dresden; Address: FiedlerstraÃŸe 42; City: Dresden; Zip/postal_code: 01307; Country: Germany	ftp://ftp.ncbi.nlm.nih.gov/geo/samples/GSM724nnn/GSM724540/suppl/GSM724540_P4_pos_2_Mouse430_2_.CEL.gz	45101	1	photoreceptors
143	663219	rhoGFP PN4 retinal cells positive FAC sorted biological repliacte 3	GSM724541	GSE29318	GPL1261	Public on Jul 12 2011	2011-05-16	2011-07-12	RNA	retina of PN4 rhoGFP mice, FAC-sorted	Mus musculus	genotype: rhoGFP; cell type: rhoGFP positive retinal cell; genetic background: C57BL/6J-129/Ola; age: postnatal day 4	total RNA	biotin	NA	RNA was isolated using Qiagen RNeasy Mini Kit according to the manufacturer's instructions.	Biotinylated cRNA were prepared according to Ambion protocol from 200ng total RNA (MessageAmpTM II-Biotin Enhanced Kit, 2009, Ambion).	NA	NA	NA	NA	NA	NA	NA	NA	Following fragmentation, 15 ug of cRNA were hybridized for 16 hr at 45Â°C on Affymetrix Mouse Genome 430 2.0 Array. GeneChips were washed and stained in the Affymetrix Fluidics Station 450.	NA	The data were analyzed with GeneSpring GX 11.0.1 software (Agilent) using normalization algorithm RMA.	Name: Kai Postel; Institute: DFG-Center for Regenerative Therapies Dresden; Address: FiedlerstraÃŸe 42; City: Dresden; Zip/postal_code: 01307; Country: Germany	ftp://ftp.ncbi.nlm.nih.gov/geo/samples/GSM724nnn/GSM724541/suppl/GSM724541_P4_pos_3_Mouse430_2_.CEL.gz	45101	1	photoreceptors
144	663220	rhoGFP PN4 retinal cells negative FAC sorted biological repliacte 1	GSM724542	GSE29318	GPL1261	Public on Jul 12 2011	2011-05-16	2011-07-12	RNA	retina of PN4 rhoGFP mice, FAC-sorted	Mus musculus	genotype: rhoGFP; cell type: rhoGFP negative retinal cell; genetic background: C57BL/6J-129/Ola; age: postnatal day 4	total RNA	biotin	NA	RNA was isolated using Qiagen RNeasy Mini Kit according to the manufacturer's instructions.	Biotinylated cRNA were prepared according to Ambion protocol from 200ng total RNA (MessageAmpTM II-Biotin Enhanced Kit, 2009, Ambion).	NA	NA	NA	NA	NA	NA	NA	NA	Following fragmentation, 15 ug of cRNA were hybridized for 16 hr at 45Â°C on Affymetrix Mouse Genome 430 2.0 Array. GeneChips were washed and stained in the Affymetrix Fluidics Station 450.	NA	The data were analyzed with GeneSpring GX 11.0.1 software (Agilent) using normalization algorithm RMA.	Name: Kai Postel; Institute: DFG-Center for Regenerative Therapies Dresden; Address: FiedlerstraÃŸe 42; City: Dresden; Zip/postal_code: 01307; Country: Germany	ftp://ftp.ncbi.nlm.nih.gov/geo/samples/GSM724nnn/GSM724542/suppl/GSM724542_P4_neg_1_Mouse430_2_.CEL.gz	45101	1	whole.retina
145	663221	rhoGFP PN4 retinal cells negative FAC sorted biological repliacte 2	GSM724543	GSE29318	GPL1261	Public on Jul 12 2011	2011-05-16	2011-07-12	RNA	retina of PN4 rhoGFP mice, FAC-sorted	Mus musculus	genotype: rhoGFP; cell type: rhoGFP negative retinal cell; genetic background: C57BL/6J-129/Ola; age: postnatal day 4	total RNA	biotin	NA	RNA was isolated using Qiagen RNeasy Mini Kit according to the manufacturer's instructions.	Biotinylated cRNA were prepared according to Ambion protocol from 200ng total RNA (MessageAmpTM II-Biotin Enhanced Kit, 2009, Ambion).	NA	NA	NA	NA	NA	NA	NA	NA	Following fragmentation, 15 ug of cRNA were hybridized for 16 hr at 45Â°C on Affymetrix Mouse Genome 430 2.0 Array. GeneChips were washed and stained in the Affymetrix Fluidics Station 450.	NA	The data were analyzed with GeneSpring GX 11.0.1 software (Agilent) using normalization algorithm RMA.	Name: Kai Postel; Institute: DFG-Center for Regenerative Therapies Dresden; Address: FiedlerstraÃŸe 42; City: Dresden; Zip/postal_code: 01307; Country: Germany	ftp://ftp.ncbi.nlm.nih.gov/geo/samples/GSM724nnn/GSM724543/suppl/GSM724543_P4_neg_2_Mouse430_2_.CEL.gz	45101	1	whole.retina
146	663222	rhoGFP PN4 retinal cells negative FAC sorted biological repliacte 3	GSM724544	GSE29318	GPL1261	Public on Jul 12 2011	2011-05-16	2011-07-12	RNA	retina of PN4 rhoGFP mice, FAC-sorted	Mus musculus	genotype: rhoGFP; cell type: rhoGFP negative retinal cell; genetic background: C57BL/6J-129/Ola; age: postnatal day 4	total RNA	biotin	NA	RNA was isolated using Qiagen RNeasy Mini Kit according to the manufacturer's instructions.	Biotinylated cRNA were prepared according to Ambion protocol from 200ng total RNA (MessageAmpTM II-Biotin Enhanced Kit, 2009, Ambion).	NA	NA	NA	NA	NA	NA	NA	NA	Following fragmentation, 15 ug of cRNA were hybridized for 16 hr at 45Â°C on Affymetrix Mouse Genome 430 2.0 Array. GeneChips were washed and stained in the Affymetrix Fluidics Station 450.	NA	The data were analyzed with GeneSpring GX 11.0.1 software (Agilent) using normalization algorithm RMA.	Name: Kai Postel; Institute: DFG-Center for Regenerative Therapies Dresden; Address: FiedlerstraÃŸe 42; City: Dresden; Zip/postal_code: 01307; Country: Germany	ftp://ftp.ncbi.nlm.nih.gov/geo/samples/GSM724nnn/GSM724544/suppl/GSM724544_P4_neg_3_Mouse430_2_.CEL.gz	45101	1	whole.retina
147	663223	nestinGFP PN0 retinal cells positive FAC sorted biological repliacte 1	GSM724545	GSE29318	GPL1261	Public on Jul 12 2011	2011-05-16	2011-07-12	RNA	retina of PN0 nestinGFP mice, FAC-sorted	Mus musculus	genotype: nestinGFP; cell type: nestinGFP positive retinal cell; genetic background: C57BL/6J-129/Ola; age: postnatal day 0	total RNA	biotin	NA	RNA was isolated using Qiagen RNeasy Mini Kit according to the manufacturer's instructions.	Biotinylated cRNA were prepared according to Ambion protocol from 200ng total RNA (MessageAmpTM II-Biotin Enhanced Kit, 2009, Ambion).	NA	NA	NA	NA	NA	NA	NA	NA	Following fragmentation, 15 ug of cRNA were hybridized for 16 hr at 45Â°C on Affymetrix Mouse Genome 430 2.0 Array. GeneChips were washed and stained in the Affymetrix Fluidics Station 450.	NA	The data were analyzed with GeneSpring GX 11.0.1 software (Agilent) using normalization algorithm RMA.	Name: Kai Postel; Institute: DFG-Center for Regenerative Therapies Dresden; Address: FiedlerstraÃŸe 42; City: Dresden; Zip/postal_code: 01307; Country: Germany	ftp://ftp.ncbi.nlm.nih.gov/geo/samples/GSM724nnn/GSM724545/suppl/GSM724545_P0_pos_1_Mouse430_2_.CEL.gz	45101	1	not.included
148	663224	nestinGFP PN0 retinal cells positive FAC sorted biological repliacte 2	GSM724546	GSE29318	GPL1261	Public on Jul 12 2011	2011-05-16	2011-07-12	RNA	retina of PN0 nestinGFP mice, FAC-sorted	Mus musculus	genotype: nestinGFP; cell type: nestinGFP positive retinal cell; genetic background: C57BL/6J-129/Ola; age: postnatal day 0	total RNA	biotin	NA	RNA was isolated using Qiagen RNeasy Mini Kit according to the manufacturer's instructions.	Biotinylated cRNA were prepared according to Ambion protocol from 200ng total RNA (MessageAmpTM II-Biotin Enhanced Kit, 2009, Ambion).	NA	NA	NA	NA	NA	NA	NA	NA	Following fragmentation, 15 ug of cRNA were hybridized for 16 hr at 45Â°C on Affymetrix Mouse Genome 430 2.0 Array. GeneChips were washed and stained in the Affymetrix Fluidics Station 450.	NA	The data were analyzed with GeneSpring GX 11.0.1 software (Agilent) using normalization algorithm RMA.	Name: Kai Postel; Institute: DFG-Center for Regenerative Therapies Dresden; Address: FiedlerstraÃŸe 42; City: Dresden; Zip/postal_code: 01307; Country: Germany	ftp://ftp.ncbi.nlm.nih.gov/geo/samples/GSM724nnn/GSM724546/suppl/GSM724546_P0_pos_2_Mouse430_2_.CEL.gz	45101	1	not.included
149	663225	nestinGFP PN0 retinal cells positive FAC sorted biological repliacte 3	GSM724547	GSE29318	GPL1261	Public on Jul 12 2011	2011-05-16	2011-07-12	RNA	retina of PN0 nestinGFP mice, FAC-sorted	Mus musculus	genotype: nestinGFP; cell type: nestinGFP positive retinal cell; genetic background: C57BL/6J-129/Ola; age: postnatal day 0	total RNA	biotin	NA	RNA was isolated using Qiagen RNeasy Mini Kit according to the manufacturer's instructions.	Biotinylated cRNA were prepared according to Ambion protocol from 200ng total RNA (MessageAmpTM II-Biotin Enhanced Kit, 2009, Ambion).	NA	NA	NA	NA	NA	NA	NA	NA	Following fragmentation, 15 ug of cRNA were hybridized for 16 hr at 45Â°C on Affymetrix Mouse Genome 430 2.0 Array. GeneChips were washed and stained in the Affymetrix Fluidics Station 450.	NA	The data were analyzed with GeneSpring GX 11.0.1 software (Agilent) using normalization algorithm RMA.	Name: Kai Postel; Institute: DFG-Center for Regenerative Therapies Dresden; Address: FiedlerstraÃŸe 42; City: Dresden; Zip/postal_code: 01307; Country: Germany	ftp://ftp.ncbi.nlm.nih.gov/geo/samples/GSM724nnn/GSM724547/suppl/GSM724547_P0_pos_3_Mouse430_2_.CEL.gz	45101	1	not.included
150	750059	Rds at post natal day 6, biological replicate 1	GSM820586	GSE33134	GPL1261	Public on Dec 31 2011	2011-10-21	2011-12-31	RNA	flow sorted rod photoreceptors	Mus musculus	tissue: Flow sorted Rod Photoreceptor; strain: C57BL/6; genotype: Rds-KO; age: post natal day 6	total RNA	biotin	Retinas were dissociated and processed using FACS to recover rod photoreceptors expressing GFP.	Total RNA was extracted using RNAqueous-4PCR (Agilent).	Biotinylated cDNA were prepared for the MOE 430 2.0 arrays using Nugen Ovation RNA Amplification System starting with 40 ng of total RNA.	NA	NA	NA	NA	NA	NA	NA	NA	Following fragmentation and labelling, 2.2 ug of cDNA were hybridized at 45C for 18 hours. GeneChips were washed and scanner in the Affymetrix FS450.	Rds at post natal day 6 flow sorted rod photorecteptor	We used GCRMA for normalization and background correction with median polish for probeset summarization. The analysis was done using the Gene Spring software from Agilent Technologies (http://www.genomics.agilent.com).	Name: Radu Cojocaru; Email: raducojo@gmail.com; Institute: Elsevier; Address: 5635 Fishers Lane, Suite 510; City: Rockville; State: MD; Zip/postal_code: 20852; Country: USA	ftp://ftp.ncbi.nlm.nih.gov/geo/samples/GSM820nnn/GSM820586/suppl/GSM820586_rds-P6-22-2.CEL.gz	45101	1	not.included
151	750060	Rds at post natal day 6, biological replicate 2	GSM820587	GSE33134	GPL1261	Public on Dec 31 2011	2011-10-21	2011-12-31	RNA	flow sorted rod photoreceptors	Mus musculus	tissue: Flow sorted Rod Photoreceptor; strain: C57BL/6; genotype: Rds-KO; age: post natal day 6	total RNA	biotin	Retinas were dissociated and processed using FACS to recover rod photoreceptors expressing GFP.	Total RNA was extracted using RNAqueous-4PCR (Agilent).	Biotinylated cDNA were prepared for the MOE 430 2.0 arrays using Nugen Ovation RNA Amplification System starting with 40 ng of total RNA.	NA	NA	NA	NA	NA	NA	NA	NA	Following fragmentation and labelling, 2.2 ug of cDNA were hybridized at 45C for 18 hours. GeneChips were washed and scanner in the Affymetrix FS450.	Rds at post natal day 6 flow sorted rod photoreceptor	We used GCRMA for normalization and background correction with median polish for probeset summarization. The analysis was done using the Gene Spring software from Agilent Technologies (http://www.genomics.agilent.com).	Name: Radu Cojocaru; Email: raducojo@gmail.com; Institute: Elsevier; Address: 5635 Fishers Lane, Suite 510; City: Rockville; State: MD; Zip/postal_code: 20852; Country: USA	ftp://ftp.ncbi.nlm.nih.gov/geo/samples/GSM820nnn/GSM820587/suppl/GSM820587_rds-P6-23-2.CEL.gz	45101	1	not.included
152	750061	Rds at post natal day 6, biological replicate 3	GSM820588	GSE33134	GPL1261	Public on Dec 31 2011	2011-10-21	2011-12-31	RNA	flow sorted rod photoreceptors	Mus musculus	tissue: Flow sorted Rod Photoreceptor; strain: C57BL/6; genotype: Rds-KO; age: post natal day 6	total RNA	biotin	Retinas were dissociated and processed using FACS to recover rod photoreceptors expressing GFP.	Total RNA was extracted using RNAqueous-4PCR (Agilent).	Biotinylated cDNA were prepared for the MOE 430 2.0 arrays using Nugen Ovation RNA Amplification System starting with 40 ng of total RNA.	NA	NA	NA	NA	NA	NA	NA	NA	Following fragmentation and labelling, 2.2 ug of cDNA were hybridized at 45C for 18 hours. GeneChips were washed and scanner in the Affymetrix FS450.	Rds at post natal day 6 flow sorted rod photoreceptor	We used GCRMA for normalization and background correction with median polish for probeset summarization. The analysis was done using the Gene Spring software from Agilent Technologies (http://www.genomics.agilent.com).	Name: Radu Cojocaru; Email: raducojo@gmail.com; Institute: Elsevier; Address: 5635 Fishers Lane, Suite 510; City: Rockville; State: MD; Zip/postal_code: 20852; Country: USA	ftp://ftp.ncbi.nlm.nih.gov/geo/samples/GSM820nnn/GSM820588/suppl/GSM820588_rds-P6-24.CEL.gz	45101	1	not.included
153	750062	Rds at post natal day 6, biological replicate 4	GSM820589	GSE33134	GPL1261	Public on Dec 31 2011	2011-10-21	2011-12-31	RNA	flow sorted rod photoreceptors	Mus musculus	tissue: Flow sorted Rod Photoreceptor; strain: C57BL/6; genotype: Rds-KO; age: post natal day 6	total RNA	biotin	Retinas were dissociated and processed using FACS to recover rod photoreceptors expressing GFP.	Total RNA was extracted using RNAqueous-4PCR (Agilent).	Biotinylated cDNA were prepared for the MOE 430 2.0 arrays using Nugen Ovation RNA Amplification System starting with 40 ng of total RNA.	NA	NA	NA	NA	NA	NA	NA	NA	Following fragmentation and labelling, 2.2 ug of cDNA were hybridized at 45C for 18 hours. GeneChips were washed and scanner in the Affymetrix FS450.	Rds at post natal day 6 flow sorted rod photoreceptor	We used GCRMA for normalization and background correction with median polish for probeset summarization. The analysis was done using the Gene Spring software from Agilent Technologies (http://www.genomics.agilent.com).	Name: Radu Cojocaru; Email: raducojo@gmail.com; Institute: Elsevier; Address: 5635 Fishers Lane, Suite 510; City: Rockville; State: MD; Zip/postal_code: 20852; Country: USA	ftp://ftp.ncbi.nlm.nih.gov/geo/samples/GSM820nnn/GSM820589/suppl/GSM820589_rds-P6-25.CEL.gz	45101	1	not.included
154	750063	Rds at post natal day 9, biological replicate 1	GSM820590	GSE33134	GPL1261	Public on Dec 31 2011	2011-10-21	2011-12-31	RNA	flow sorted rod photoreceptors	Mus musculus	tissue: Flow sorted Rod Photoreceptor; strain: C57BL/6; genotype: Rds-KO; age: post natal day 9	total RNA	biotin	Retinas were dissociated and processed using FACS to recover rod photoreceptors expressing GFP.	Total RNA was extracted using RNAqueous-4PCR (Agilent).	Biotinylated cDNA were prepared for the MOE 430 2.0 arrays using Nugen Ovation RNA Amplification System starting with 40 ng of total RNA.	NA	NA	NA	NA	NA	NA	NA	NA	Following fragmentation and labelling, 2.2 ug of cDNA were hybridized at 45C for 18 hours. GeneChips were washed and scanner in the Affymetrix FS450.	Rds at post natal day 9 flow sorted rod photorecteptor	We used GCRMA for normalization and background correction with median polish for probeset summarization. The analysis was done using the Gene Spring software from Agilent Technologies (http://www.genomics.agilent.com).	Name: Radu Cojocaru; Email: raducojo@gmail.com; Institute: Elsevier; Address: 5635 Fishers Lane, Suite 510; City: Rockville; State: MD; Zip/postal_code: 20852; Country: USA	ftp://ftp.ncbi.nlm.nih.gov/geo/samples/GSM820nnn/GSM820590/suppl/GSM820590_rds-P9-B1.CEL.gz	45101	1	not.included
155	750064	Rds at post natal day 9, biological replicate 2	GSM820591	GSE33134	GPL1261	Public on Dec 31 2011	2011-10-21	2011-12-31	RNA	flow sorted rod photoreceptors	Mus musculus	tissue: Flow sorted Rod Photoreceptor; strain: C57BL/6; genotype: Rds-KO; age: post natal day 9	total RNA	biotin	Retinas were dissociated and processed using FACS to recover rod photoreceptors expressing GFP.	Total RNA was extracted using RNAqueous-4PCR (Agilent).	Biotinylated cDNA were prepared for the MOE 430 2.0 arrays using Nugen Ovation RNA Amplification System starting with 40 ng of total RNA.	NA	NA	NA	NA	NA	NA	NA	NA	Following fragmentation and labelling, 2.2 ug of cDNA were hybridized at 45C for 18 hours. GeneChips were washed and scanner in the Affymetrix FS450.	Rds at post natal day 9 flow sorted rod photoreceptor	We used GCRMA for normalization and background correction with median polish for probeset summarization. The analysis was done using the Gene Spring software from Agilent Technologies (http://www.genomics.agilent.com).	Name: Radu Cojocaru; Email: raducojo@gmail.com; Institute: Elsevier; Address: 5635 Fishers Lane, Suite 510; City: Rockville; State: MD; Zip/postal_code: 20852; Country: USA	ftp://ftp.ncbi.nlm.nih.gov/geo/samples/GSM820nnn/GSM820591/suppl/GSM820591_rds-P9-E.CEL.gz	45101	1	not.included
156	750065	Rds at post natal day 9, biological replicate 3	GSM820592	GSE33134	GPL1261	Public on Dec 31 2011	2011-10-21	2011-12-31	RNA	flow sorted rod photoreceptors	Mus musculus	tissue: Flow sorted Rod Photoreceptor; strain: C57BL/6; genotype: Rds-KO; age: post natal day 9	total RNA	biotin	Retinas were dissociated and processed using FACS to recover rod photoreceptors expressing GFP.	Total RNA was extracted using RNAqueous-4PCR (Agilent).	Biotinylated cDNA were prepared for the MOE 430 2.0 arrays using Nugen Ovation RNA Amplification System starting with 40 ng of total RNA.	NA	NA	NA	NA	NA	NA	NA	NA	Following fragmentation and labelling, 2.2 ug of cDNA were hybridized at 45C for 18 hours. GeneChips were washed and scanner in the Affymetrix FS450.	Rds at post natal day 9 flow sorted rod photoreceptor	We used GCRMA for normalization and background correction with median polish for probeset summarization. The analysis was done using the Gene Spring software from Agilent Technologies (http://www.genomics.agilent.com).	Name: Radu Cojocaru; Email: raducojo@gmail.com; Institute: Elsevier; Address: 5635 Fishers Lane, Suite 510; City: Rockville; State: MD; Zip/postal_code: 20852; Country: USA	ftp://ftp.ncbi.nlm.nih.gov/geo/samples/GSM820nnn/GSM820592/suppl/GSM820592_rds-P9-F.CEL.gz	45101	1	not.included
157	750066	Rds at post natal day 9, biological replicate 4	GSM820593	GSE33134	GPL1261	Public on Dec 31 2011	2011-10-21	2011-12-31	RNA	flow sorted rod photoreceptors	Mus musculus	tissue: Flow sorted Rod Photoreceptor; strain: C57BL/6; genotype: Rds-KO; age: post natal day 9	total RNA	biotin	Retinas were dissociated and processed using FACS to recover rod photoreceptors expressing GFP.	Total RNA was extracted using RNAqueous-4PCR (Agilent).	Biotinylated cDNA were prepared for the MOE 430 2.0 arrays using Nugen Ovation RNA Amplification System starting with 40 ng of total RNA.	NA	NA	NA	NA	NA	NA	NA	NA	Following fragmentation and labelling, 2.2 ug of cDNA were hybridized at 45C for 18 hours. GeneChips were washed and scanner in the Affymetrix FS450.	Rds at post natal day 9 flow sorted rod photoreceptor	We used GCRMA for normalization and background correction with median polish for probeset summarization. The analysis was done using the Gene Spring software from Agilent Technologies (http://www.genomics.agilent.com).	Name: Radu Cojocaru; Email: raducojo@gmail.com; Institute: Elsevier; Address: 5635 Fishers Lane, Suite 510; City: Rockville; State: MD; Zip/postal_code: 20852; Country: USA	ftp://ftp.ncbi.nlm.nih.gov/geo/samples/GSM820nnn/GSM820593/suppl/GSM820593_rds-P9-O.CEL.gz	45101	1	not.included
158	750067	Rds at post natal day 14, biological replicate 1	GSM820594	GSE33134	GPL1261	Public on Dec 31 2011	2011-10-21	2011-12-31	RNA	flow sorted rod photoreceptors	Mus musculus	tissue: Flow sorted Rod Photoreceptor; strain: C57BL/6; genotype: Rds-KO; age: post natal day 14	total RNA	biotin	Retinas were dissociated and processed using FACS to recover rod photoreceptors expressing GFP.	Total RNA was extracted using RNAqueous-4PCR (Agilent).	Biotinylated cDNA were prepared for the MOE 430 2.0 arrays using Nugen Ovation RNA Amplification System starting with 40 ng of total RNA.	NA	NA	NA	NA	NA	NA	NA	NA	Following fragmentation and labelling, 2.2 ug of cDNA were hybridized at 45C for 18 hours. GeneChips were washed and scanner in the Affymetrix FS450.	Rds at post natal day 14 flow sorted rod photorecteptor	We used GCRMA for normalization and background correction with median polish for probeset summarization. The analysis was done using the Gene Spring software from Agilent Technologies (http://www.genomics.agilent.com).	Name: Radu Cojocaru; Email: raducojo@gmail.com; Institute: Elsevier; Address: 5635 Fishers Lane, Suite 510; City: Rockville; State: MD; Zip/postal_code: 20852; Country: USA	ftp://ftp.ncbi.nlm.nih.gov/geo/samples/GSM820nnn/GSM820594/suppl/GSM820594_rds-P14-G.CEL.gz	45101	1	not.included
159	750068	Rds at post natal day 14, biological replicate 2	GSM820595	GSE33134	GPL1261	Public on Dec 31 2011	2011-10-21	2011-12-31	RNA	flow sorted rod photoreceptors	Mus musculus	tissue: Flow sorted Rod Photoreceptor; strain: C57BL/6; genotype: Rds-KO; age: post natal day 14	total RNA	biotin	Retinas were dissociated and processed using FACS to recover rod photoreceptors expressing GFP.	Total RNA was extracted using RNAqueous-4PCR (Agilent).	Biotinylated cDNA were prepared for the MOE 430 2.0 arrays using Nugen Ovation RNA Amplification System starting with 40 ng of total RNA.	NA	NA	NA	NA	NA	NA	NA	NA	Following fragmentation and labelling, 2.2 ug of cDNA were hybridized at 45C for 18 hours. GeneChips were washed and scanner in the Affymetrix FS450.	Rds at post natal day 14 flow sorted rod photoreceptor	We used GCRMA for normalization and background correction with median polish for probeset summarization. The analysis was done using the Gene Spring software from Agilent Technologies (http://www.genomics.agilent.com).	Name: Radu Cojocaru; Email: raducojo@gmail.com; Institute: Elsevier; Address: 5635 Fishers Lane, Suite 510; City: Rockville; State: MD; Zip/postal_code: 20852; Country: USA	ftp://ftp.ncbi.nlm.nih.gov/geo/samples/GSM820nnn/GSM820595/suppl/GSM820595_rds-P14-K.CEL.gz	45101	1	not.included
160	750069	Rds at post natal day 14, biological replicate 3	GSM820596	GSE33134	GPL1261	Public on Dec 31 2011	2011-10-21	2011-12-31	RNA	flow sorted rod photoreceptors	Mus musculus	tissue: Flow sorted Rod Photoreceptor; strain: C57BL/6; genotype: Rds-KO; age: post natal day 14	total RNA	biotin	Retinas were dissociated and processed using FACS to recover rod photoreceptors expressing GFP.	Total RNA was extracted using RNAqueous-4PCR (Agilent).	Biotinylated cDNA were prepared for the MOE 430 2.0 arrays using Nugen Ovation RNA Amplification System starting with 40 ng of total RNA.	NA	NA	NA	NA	NA	NA	NA	NA	Following fragmentation and labelling, 2.2 ug of cDNA were hybridized at 45C for 18 hours. GeneChips were washed and scanner in the Affymetrix FS450.	Rds at post natal day 14 flow sorted rod photoreceptor	We used GCRMA for normalization and background correction with median polish for probeset summarization. The analysis was done using the Gene Spring software from Agilent Technologies (http://www.genomics.agilent.com).	Name: Radu Cojocaru; Email: raducojo@gmail.com; Institute: Elsevier; Address: 5635 Fishers Lane, Suite 510; City: Rockville; State: MD; Zip/postal_code: 20852; Country: USA	ftp://ftp.ncbi.nlm.nih.gov/geo/samples/GSM820nnn/GSM820596/suppl/GSM820596_rds-P14-L.CEL.gz	45101	1	not.included
161	750070	Rds at post natal day 14, biological replicate 4	GSM820597	GSE33134	GPL1261	Public on Dec 31 2011	2011-10-21	2011-12-31	RNA	flow sorted rod photoreceptors	Mus musculus	tissue: Flow sorted Rod Photoreceptor; strain: C57BL/6; genotype: Rds-KO; age: post natal day 14	total RNA	biotin	Retinas were dissociated and processed using FACS to recover rod photoreceptors expressing GFP.	Total RNA was extracted using RNAqueous-4PCR (Agilent).	Biotinylated cDNA were prepared for the MOE 430 2.0 arrays using Nugen Ovation RNA Amplification System starting with 40 ng of total RNA.	NA	NA	NA	NA	NA	NA	NA	NA	Following fragmentation and labelling, 2.2 ug of cDNA were hybridized at 45C for 18 hours. GeneChips were washed and scanner in the Affymetrix FS450.	Rds at post natal day 14 flow sorted rod photoreceptor	We used GCRMA for normalization and background correction with median polish for probeset summarization. The analysis was done using the Gene Spring software from Agilent Technologies (http://www.genomics.agilent.com).	Name: Radu Cojocaru; Email: raducojo@gmail.com; Institute: Elsevier; Address: 5635 Fishers Lane, Suite 510; City: Rockville; State: MD; Zip/postal_code: 20852; Country: USA	ftp://ftp.ncbi.nlm.nih.gov/geo/samples/GSM820nnn/GSM820597/suppl/GSM820597_rds-P14-Q.CEL.gz	45101	1	not.included
162	750071	Rds at post natal day 21, biological replicate 1	GSM820598	GSE33134	GPL1261	Public on Dec 31 2011	2011-10-21	2011-12-31	RNA	flow sorted rod photoreceptors	Mus musculus	tissue: Flow sorted Rod Photoreceptor; strain: C57BL/6; genotype: Rds-KO; age: post natal day 21	total RNA	biotin	Retinas were dissociated and processed using FACS to recover rod photoreceptors expressing GFP.	Total RNA was extracted using RNAqueous-4PCR (Agilent).	Biotinylated cDNA were prepared for the MOE 430 2.0 arrays using Nugen Ovation RNA Amplification System starting with 40 ng of total RNA.	NA	NA	NA	NA	NA	NA	NA	NA	Following fragmentation and labelling, 2.2 ug of cDNA were hybridized at 45C for 18 hours. GeneChips were washed and scanner in the Affymetrix FS450.	Rds at post natal day 21 flow sorted rod photorecteptor	We used GCRMA for normalization and background correction with median polish for probeset summarization. The analysis was done using the Gene Spring software from Agilent Technologies (http://www.genomics.agilent.com).	Name: Radu Cojocaru; Email: raducojo@gmail.com; Institute: Elsevier; Address: 5635 Fishers Lane, Suite 510; City: Rockville; State: MD; Zip/postal_code: 20852; Country: USA	ftp://ftp.ncbi.nlm.nih.gov/geo/samples/GSM820nnn/GSM820598/suppl/GSM820598_rds-P21-H.CEL.gz	45101	1	not.included
163	750072	Rds at post natal day 21, biological replicate 2	GSM820599	GSE33134	GPL1261	Public on Dec 31 2011	2011-10-21	2011-12-31	RNA	flow sorted rod photoreceptors	Mus musculus	tissue: Flow sorted Rod Photoreceptor; strain: C57BL/6; genotype: Rds-KO; age: post natal day 21	total RNA	biotin	Retinas were dissociated and processed using FACS to recover rod photoreceptors expressing GFP.	Total RNA was extracted using RNAqueous-4PCR (Agilent).	Biotinylated cDNA were prepared for the MOE 430 2.0 arrays using Nugen Ovation RNA Amplification System starting with 40 ng of total RNA.	NA	NA	NA	NA	NA	NA	NA	NA	Following fragmentation and labelling, 2.2 ug of cDNA were hybridized at 45C for 18 hours. GeneChips were washed and scanner in the Affymetrix FS450.	Rds at post natal day 21 flow sorted rod photoreceptor	We used GCRMA for normalization and background correction with median polish for probeset summarization. The analysis was done using the Gene Spring software from Agilent Technologies (http://www.genomics.agilent.com).	Name: Radu Cojocaru; Email: raducojo@gmail.com; Institute: Elsevier; Address: 5635 Fishers Lane, Suite 510; City: Rockville; State: MD; Zip/postal_code: 20852; Country: USA	ftp://ftp.ncbi.nlm.nih.gov/geo/samples/GSM820nnn/GSM820599/suppl/GSM820599_rds-P21-I.CEL.gz	45101	1	not.included
164	750073	Rds at post natal day 21, biological replicate 3	GSM820600	GSE33134	GPL1261	Public on Dec 31 2011	2011-10-21	2011-12-31	RNA	flow sorted rod photoreceptors	Mus musculus	tissue: Flow sorted Rod Photoreceptor; strain: C57BL/6; genotype: Rds-KO; age: post natal day 21	total RNA	biotin	Retinas were dissociated and processed using FACS to recover rod photoreceptors expressing GFP.	Total RNA was extracted using RNAqueous-4PCR (Agilent).	Biotinylated cDNA were prepared for the MOE 430 2.0 arrays using Nugen Ovation RNA Amplification System starting with 40 ng of total RNA.	NA	NA	NA	NA	NA	NA	NA	NA	Following fragmentation and labelling, 2.2 ug of cDNA were hybridized at 45C for 18 hours. GeneChips were washed and scanner in the Affymetrix FS450.	Rds at post natal day 21 flow sorted rod photoreceptor	We used GCRMA for normalization and background correction with median polish for probeset summarization. The analysis was done using the Gene Spring software from Agilent Technologies (http://www.genomics.agilent.com).	Name: Radu Cojocaru; Email: raducojo@gmail.com; Institute: Elsevier; Address: 5635 Fishers Lane, Suite 510; City: Rockville; State: MD; Zip/postal_code: 20852; Country: USA	ftp://ftp.ncbi.nlm.nih.gov/geo/samples/GSM820nnn/GSM820600/suppl/GSM820600_rds-P21-M.CEL.gz	45101	1	not.included
165	750074	Rds at post natal day 21, biological replicate 4	GSM820601	GSE33134	GPL1261	Public on Dec 31 2011	2011-10-21	2011-12-31	RNA	flow sorted rod photoreceptors	Mus musculus	tissue: Flow sorted Rod Photoreceptor; strain: C57BL/6; genotype: Rds-KO; age: post natal day 21	total RNA	biotin	Retinas were dissociated and processed using FACS to recover rod photoreceptors expressing GFP.	Total RNA was extracted using RNAqueous-4PCR (Agilent).	Biotinylated cDNA were prepared for the MOE 430 2.0 arrays using Nugen Ovation RNA Amplification System starting with 40 ng of total RNA.	NA	NA	NA	NA	NA	NA	NA	NA	Following fragmentation and labelling, 2.2 ug of cDNA were hybridized at 45C for 18 hours. GeneChips were washed and scanner in the Affymetrix FS450.	Rds at post natal day 21 flow sorted rod photoreceptor	We used GCRMA for normalization and background correction with median polish for probeset summarization. The analysis was done using the Gene Spring software from Agilent Technologies (http://www.genomics.agilent.com).	Name: Radu Cojocaru; Email: raducojo@gmail.com; Institute: Elsevier; Address: 5635 Fishers Lane, Suite 510; City: Rockville; State: MD; Zip/postal_code: 20852; Country: USA	ftp://ftp.ncbi.nlm.nih.gov/geo/samples/GSM820nnn/GSM820601/suppl/GSM820601_rds-P21-S.CEL.gz	45101	1	not.included
166	750075	WT at post natal day 6, biological replicate 1	GSM820602	GSE33134	GPL1261	Public on Dec 31 2011	2011-10-21	2011-12-31	RNA	flow sorted rod photoreceptors	Mus musculus	tissue: Flow sorted Rod Photoreceptor; strain: C57BL/6; genotype: wild type; age: post natal day 6	total RNA	biotin	Retinas were dissociated and processed using FACS to recover rod photoreceptors expressing GFP.	Total RNA was extracted using RNAqueous-4PCR (Agilent).	Biotinylated cDNA were prepared for the MOE 430 2.0 arrays using Nugen Ovation RNA Amplification System starting with 40 ng of total RNA.	NA	NA	NA	NA	NA	NA	NA	NA	Following fragmentation and labelling, 2.2 ug of cDNA were hybridized at 45C for 18 hours. GeneChips were washed and scanner in the Affymetrix FS450.	WT at post natal day 6 flow sorted rod photorecteptor	We used GCRMA for normalization and background correction with median polish for probeset summarization. The analysis was done using the Gene Spring software from Agilent Technologies (http://www.genomics.agilent.com).	Name: Radu Cojocaru; Email: raducojo@gmail.com; Institute: Elsevier; Address: 5635 Fishers Lane, Suite 510; City: Rockville; State: MD; Zip/postal_code: 20852; Country: USA	ftp://ftp.ncbi.nlm.nih.gov/geo/samples/GSM820nnn/GSM820602/suppl/GSM820602_wt-P6-9.CEL.gz	45101	1	photoreceptors
167	750076	WT at post natal day 6, biological replicate 2	GSM820603	GSE33134	GPL1261	Public on Dec 31 2011	2011-10-21	2011-12-31	RNA	flow sorted rod photoreceptors	Mus musculus	tissue: Flow sorted Rod Photoreceptor; strain: C57BL/6; genotype: wild type; age: post natal day 6	total RNA	biotin	Retinas were dissociated and processed using FACS to recover rod photoreceptors expressing GFP.	Total RNA was extracted using RNAqueous-4PCR (Agilent).	Biotinylated cDNA were prepared for the MOE 430 2.0 arrays using Nugen Ovation RNA Amplification System starting with 40 ng of total RNA.	NA	NA	NA	NA	NA	NA	NA	NA	Following fragmentation and labelling, 2.2 ug of cDNA were hybridized at 45C for 18 hours. GeneChips were washed and scanner in the Affymetrix FS450.	WT at post natal day 6 flow sorted rod photoreceptor	We used GCRMA for normalization and background correction with median polish for probeset summarization. The analysis was done using the Gene Spring software from Agilent Technologies (http://www.genomics.agilent.com).	Name: Radu Cojocaru; Email: raducojo@gmail.com; Institute: Elsevier; Address: 5635 Fishers Lane, Suite 510; City: Rockville; State: MD; Zip/postal_code: 20852; Country: USA	ftp://ftp.ncbi.nlm.nih.gov/geo/samples/GSM820nnn/GSM820603/suppl/GSM820603_wt-P6-12-2.CEL.gz	45101	1	photoreceptors
168	750077	WT at post natal day 6, biological replicate 3	GSM820604	GSE33134	GPL1261	Public on Dec 31 2011	2011-10-21	2011-12-31	RNA	flow sorted rod photoreceptors	Mus musculus	tissue: Flow sorted Rod Photoreceptor; strain: C57BL/6; genotype: wild type; age: post natal day 6	total RNA	biotin	Retinas were dissociated and processed using FACS to recover rod photoreceptors expressing GFP.	Total RNA was extracted using RNAqueous-4PCR (Agilent).	Biotinylated cDNA were prepared for the MOE 430 2.0 arrays using Nugen Ovation RNA Amplification System starting with 40 ng of total RNA.	NA	NA	NA	NA	NA	NA	NA	NA	Following fragmentation and labelling, 2.2 ug of cDNA were hybridized at 45C for 18 hours. GeneChips were washed and scanner in the Affymetrix FS450.	WT at post natal day 6 flow sorted rod photoreceptor	We used GCRMA for normalization and background correction with median polish for probeset summarization. The analysis was done using the Gene Spring software from Agilent Technologies (http://www.genomics.agilent.com).	Name: Radu Cojocaru; Email: raducojo@gmail.com; Institute: Elsevier; Address: 5635 Fishers Lane, Suite 510; City: Rockville; State: MD; Zip/postal_code: 20852; Country: USA	ftp://ftp.ncbi.nlm.nih.gov/geo/samples/GSM820nnn/GSM820604/suppl/GSM820604_wt-P6-15.CEL.gz	45101	1	photoreceptors
169	750078	WT at post natal day 6, biological replicate 4	GSM820605	GSE33134	GPL1261	Public on Dec 31 2011	2011-10-21	2011-12-31	RNA	flow sorted rod photoreceptors	Mus musculus	tissue: Flow sorted Rod Photoreceptor; strain: C57BL/6; genotype: wild type; age: post natal day 6	total RNA	biotin	Retinas were dissociated and processed using FACS to recover rod photoreceptors expressing GFP.	Total RNA was extracted using RNAqueous-4PCR (Agilent).	Biotinylated cDNA were prepared for the MOE 430 2.0 arrays using Nugen Ovation RNA Amplification System starting with 40 ng of total RNA.	NA	NA	NA	NA	NA	NA	NA	NA	Following fragmentation and labelling, 2.2 ug of cDNA were hybridized at 45C for 18 hours. GeneChips were washed and scanner in the Affymetrix FS450.	WT at post natal day 6 flow sorted rod photoreceptor	We used GCRMA for normalization and background correction with median polish for probeset summarization. The analysis was done using the Gene Spring software from Agilent Technologies (http://www.genomics.agilent.com).	Name: Radu Cojocaru; Email: raducojo@gmail.com; Institute: Elsevier; Address: 5635 Fishers Lane, Suite 510; City: Rockville; State: MD; Zip/postal_code: 20852; Country: USA	ftp://ftp.ncbi.nlm.nih.gov/geo/samples/GSM820nnn/GSM820605/suppl/GSM820605_wt-P6-16-2.CEL.gz	45101	1	photoreceptors
170	750079	WT at post natal day 9, biological replicate 1	GSM820606	GSE33134	GPL1261	Public on Dec 31 2011	2011-10-21	2011-12-31	RNA	flow sorted rod photoreceptors	Mus musculus	tissue: Flow sorted Rod Photoreceptor; strain: C57BL/6; genotype: wild type; age: post natal day 9	total RNA	biotin	Retinas were dissociated and processed using FACS to recover rod photoreceptors expressing GFP.	Total RNA was extracted using RNAqueous-4PCR (Agilent).	Biotinylated cDNA were prepared for the MOE 430 2.0 arrays using Nugen Ovation RNA Amplification System starting with 40 ng of total RNA.	NA	NA	NA	NA	NA	NA	NA	NA	Following fragmentation and labelling, 2.2 ug of cDNA were hybridized at 45C for 18 hours. GeneChips were washed and scanner in the Affymetrix FS450.	WT at post natal day 9 flow sorted rod photorecteptor	We used GCRMA for normalization and background correction with median polish for probeset summarization. The analysis was done using the Gene Spring software from Agilent Technologies (http://www.genomics.agilent.com).	Name: Radu Cojocaru; Email: raducojo@gmail.com; Institute: Elsevier; Address: 5635 Fishers Lane, Suite 510; City: Rockville; State: MD; Zip/postal_code: 20852; Country: USA	ftp://ftp.ncbi.nlm.nih.gov/geo/samples/GSM820nnn/GSM820606/suppl/GSM820606_wt-P9-3.CEL.gz	45101	1	photoreceptors
171	750080	WT at post natal day 9, biological replicate 2	GSM820607	GSE33134	GPL1261	Public on Dec 31 2011	2011-10-21	2011-12-31	RNA	flow sorted rod photoreceptors	Mus musculus	tissue: Flow sorted Rod Photoreceptor; strain: C57BL/6; genotype: wild type; age: post natal day 9	total RNA	biotin	Retinas were dissociated and processed using FACS to recover rod photoreceptors expressing GFP.	Total RNA was extracted using RNAqueous-4PCR (Agilent).	Biotinylated cDNA were prepared for the MOE 430 2.0 arrays using Nugen Ovation RNA Amplification System starting with 40 ng of total RNA.	NA	NA	NA	NA	NA	NA	NA	NA	Following fragmentation and labelling, 2.2 ug of cDNA were hybridized at 45C for 18 hours. GeneChips were washed and scanner in the Affymetrix FS450.	WT at post natal day 9 flow sorted rod photoreceptor	We used GCRMA for normalization and background correction with median polish for probeset summarization. The analysis was done using the Gene Spring software from Agilent Technologies (http://www.genomics.agilent.com).	Name: Radu Cojocaru; Email: raducojo@gmail.com; Institute: Elsevier; Address: 5635 Fishers Lane, Suite 510; City: Rockville; State: MD; Zip/postal_code: 20852; Country: USA	ftp://ftp.ncbi.nlm.nih.gov/geo/samples/GSM820nnn/GSM820607/suppl/GSM820607_wt-P9-4.CEL.gz	45101	1	photoreceptors
172	750081	WT at post natal day 9, biological replicate 3	GSM820608	GSE33134	GPL1261	Public on Dec 31 2011	2011-10-21	2011-12-31	RNA	flow sorted rod photoreceptors	Mus musculus	tissue: Flow sorted Rod Photoreceptor; strain: C57BL/6; genotype: wild type; age: post natal day 9	total RNA	biotin	Retinas were dissociated and processed using FACS to recover rod photoreceptors expressing GFP.	Total RNA was extracted using RNAqueous-4PCR (Agilent).	Biotinylated cDNA were prepared for the MOE 430 2.0 arrays using Nugen Ovation RNA Amplification System starting with 40 ng of total RNA.	NA	NA	NA	NA	NA	NA	NA	NA	Following fragmentation and labelling, 2.2 ug of cDNA were hybridized at 45C for 18 hours. GeneChips were washed and scanner in the Affymetrix FS450.	WT at post natal day 9 flow sorted rod photoreceptor	We used GCRMA for normalization and background correction with median polish for probeset summarization. The analysis was done using the Gene Spring software from Agilent Technologies (http://www.genomics.agilent.com).	Name: Radu Cojocaru; Email: raducojo@gmail.com; Institute: Elsevier; Address: 5635 Fishers Lane, Suite 510; City: Rockville; State: MD; Zip/postal_code: 20852; Country: USA	ftp://ftp.ncbi.nlm.nih.gov/geo/samples/GSM820nnn/GSM820608/suppl/GSM820608_wt-P9-8.CEL.gz	45101	1	photoreceptors
173	750082	WT at post natal day 9, biological replicate 4	GSM820609	GSE33134	GPL1261	Public on Dec 31 2011	2011-10-21	2011-12-31	RNA	flow sorted rod photoreceptors	Mus musculus	tissue: Flow sorted Rod Photoreceptor; strain: C57BL/6; genotype: wild type; age: post natal day 9	total RNA	biotin	Retinas were dissociated and processed using FACS to recover rod photoreceptors expressing GFP.	Total RNA was extracted using RNAqueous-4PCR (Agilent).	Biotinylated cDNA were prepared for the MOE 430 2.0 arrays using Nugen Ovation RNA Amplification System starting with 40 ng of total RNA.	NA	NA	NA	NA	NA	NA	NA	NA	Following fragmentation and labelling, 2.2 ug of cDNA were hybridized at 45C for 18 hours. GeneChips were washed and scanner in the Affymetrix FS450.	WT at post natal day 9 flow sorted rod photoreceptor	We used GCRMA for normalization and background correction with median polish for probeset summarization. The analysis was done using the Gene Spring software from Agilent Technologies (http://www.genomics.agilent.com).	Name: Radu Cojocaru; Email: raducojo@gmail.com; Institute: Elsevier; Address: 5635 Fishers Lane, Suite 510; City: Rockville; State: MD; Zip/postal_code: 20852; Country: USA	ftp://ftp.ncbi.nlm.nih.gov/geo/samples/GSM820nnn/GSM820609/suppl/GSM820609_wt-P9-A.CEL.gz	45101	1	photoreceptors
174	750083	WT at post natal day 14, biological replicate 1	GSM820610	GSE33134	GPL1261	Public on Dec 31 2011	2011-10-21	2011-12-31	RNA	flow sorted rod photoreceptors	Mus musculus	tissue: Flow sorted Rod Photoreceptor; strain: C57BL/6; genotype: wild type; age: post natal day 14	total RNA	biotin	Retinas were dissociated and processed using FACS to recover rod photoreceptors expressing GFP.	Total RNA was extracted using RNAqueous-4PCR (Agilent).	Biotinylated cDNA were prepared for the MOE 430 2.0 arrays using Nugen Ovation RNA Amplification System starting with 40 ng of total RNA.	NA	NA	NA	NA	NA	NA	NA	NA	Following fragmentation and labelling, 2.2 ug of cDNA were hybridized at 45C for 18 hours. GeneChips were washed and scanner in the Affymetrix FS450.	WT at post natal day 14 flow sorted rod photorecteptor	We used GCRMA for normalization and background correction with median polish for probeset summarization. The analysis was done using the Gene Spring software from Agilent Technologies (http://www.genomics.agilent.com).	Name: Radu Cojocaru; Email: raducojo@gmail.com; Institute: Elsevier; Address: 5635 Fishers Lane, Suite 510; City: Rockville; State: MD; Zip/postal_code: 20852; Country: USA	ftp://ftp.ncbi.nlm.nih.gov/geo/samples/GSM820nnn/GSM820610/suppl/GSM820610_wt-P14-13.CEL.gz	45101	1	photoreceptors
175	750084	WT at post natal day 14, biological replicate 2	GSM820611	GSE33134	GPL1261	Public on Dec 31 2011	2011-10-21	2011-12-31	RNA	flow sorted rod photoreceptors	Mus musculus	tissue: Flow sorted Rod Photoreceptor; strain: C57BL/6; genotype: wild type; age: post natal day 14	total RNA	biotin	Retinas were dissociated and processed using FACS to recover rod photoreceptors expressing GFP.	Total RNA was extracted using RNAqueous-4PCR (Agilent).	Biotinylated cDNA were prepared for the MOE 430 2.0 arrays using Nugen Ovation RNA Amplification System starting with 40 ng of total RNA.	NA	NA	NA	NA	NA	NA	NA	NA	Following fragmentation and labelling, 2.2 ug of cDNA were hybridized at 45C for 18 hours. GeneChips were washed and scanner in the Affymetrix FS450.	WT at post natal day 14 flow sorted rod photoreceptor	We used GCRMA for normalization and background correction with median polish for probeset summarization. The analysis was done using the Gene Spring software from Agilent Technologies (http://www.genomics.agilent.com).	Name: Radu Cojocaru; Email: raducojo@gmail.com; Institute: Elsevier; Address: 5635 Fishers Lane, Suite 510; City: Rockville; State: MD; Zip/postal_code: 20852; Country: USA	ftp://ftp.ncbi.nlm.nih.gov/geo/samples/GSM820nnn/GSM820611/suppl/GSM820611_wt-P14-14-2.CEL.gz	45101	1	photoreceptors
176	750085	WT at post natal day 14, biological replicate 3	GSM820612	GSE33134	GPL1261	Public on Dec 31 2011	2011-10-21	2011-12-31	RNA	flow sorted rod photoreceptors	Mus musculus	tissue: Flow sorted Rod Photoreceptor; strain: C57BL/6; genotype: wild type; age: post natal day 14	total RNA	biotin	Retinas were dissociated and processed using FACS to recover rod photoreceptors expressing GFP.	Total RNA was extracted using RNAqueous-4PCR (Agilent).	Biotinylated cDNA were prepared for the MOE 430 2.0 arrays using Nugen Ovation RNA Amplification System starting with 40 ng of total RNA.	NA	NA	NA	NA	NA	NA	NA	NA	Following fragmentation and labelling, 2.2 ug of cDNA were hybridized at 45C for 18 hours. GeneChips were washed and scanner in the Affymetrix FS450.	WT at post natal day 14 flow sorted rod photoreceptor	We used GCRMA for normalization and background correction with median polish for probeset summarization. The analysis was done using the Gene Spring software from Agilent Technologies (http://www.genomics.agilent.com).	Name: Radu Cojocaru; Email: raducojo@gmail.com; Institute: Elsevier; Address: 5635 Fishers Lane, Suite 510; City: Rockville; State: MD; Zip/postal_code: 20852; Country: USA	ftp://ftp.ncbi.nlm.nih.gov/geo/samples/GSM820nnn/GSM820612/suppl/GSM820612_wt-P14-D.CEL.gz	45101	1	photoreceptors
177	750086	WT at post natal day 21, biological replicate 1	GSM820613	GSE33134	GPL1261	Public on Dec 31 2011	2011-10-21	2011-12-31	RNA	flow sorted rod photoreceptors	Mus musculus	tissue: Flow sorted Rod Photoreceptor; strain: C57BL/6; genotype: wild type; age: post natal day 21	total RNA	biotin	Retinas were dissociated and processed using FACS to recover rod photoreceptors expressing GFP.	Total RNA was extracted using RNAqueous-4PCR (Agilent).	Biotinylated cDNA were prepared for the MOE 430 2.0 arrays using Nugen Ovation RNA Amplification System starting with 40 ng of total RNA.	NA	NA	NA	NA	NA	NA	NA	NA	Following fragmentation and labelling, 2.2 ug of cDNA were hybridized at 45C for 18 hours. GeneChips were washed and scanner in the Affymetrix FS450.	WT at post natal day 21 flow sorted rod photorecteptor	We used GCRMA for normalization and background correction with median polish for probeset summarization. The analysis was done using the Gene Spring software from Agilent Technologies (http://www.genomics.agilent.com).	Name: Radu Cojocaru; Email: raducojo@gmail.com; Institute: Elsevier; Address: 5635 Fishers Lane, Suite 510; City: Rockville; State: MD; Zip/postal_code: 20852; Country: USA	ftp://ftp.ncbi.nlm.nih.gov/geo/samples/GSM820nnn/GSM820613/suppl/GSM820613_wt-P21-17-3.CEL.gz	45101	1	not.included
178	750087	WT at post natal day 21, biological replicate 2	GSM820614	GSE33134	GPL1261	Public on Dec 31 2011	2011-10-21	2011-12-31	RNA	flow sorted rod photoreceptors	Mus musculus	tissue: Flow sorted Rod Photoreceptor; strain: C57BL/6; genotype: wild type; age: post natal day 21	total RNA	biotin	Retinas were dissociated and processed using FACS to recover rod photoreceptors expressing GFP.	Total RNA was extracted using RNAqueous-4PCR (Agilent).	Biotinylated cDNA were prepared for the MOE 430 2.0 arrays using Nugen Ovation RNA Amplification System starting with 40 ng of total RNA.	NA	NA	NA	NA	NA	NA	NA	NA	Following fragmentation and labelling, 2.2 ug of cDNA were hybridized at 45C for 18 hours. GeneChips were washed and scanner in the Affymetrix FS450.	WT at post natal day 21 flow sorted rod photoreceptor	We used GCRMA for normalization and background correction with median polish for probeset summarization. The analysis was done using the Gene Spring software from Agilent Technologies (http://www.genomics.agilent.com).	Name: Radu Cojocaru; Email: raducojo@gmail.com; Institute: Elsevier; Address: 5635 Fishers Lane, Suite 510; City: Rockville; State: MD; Zip/postal_code: 20852; Country: USA	ftp://ftp.ncbi.nlm.nih.gov/geo/samples/GSM820nnn/GSM820614/suppl/GSM820614_wt-P21-18-2.CEL.gz	45101	1	not.included
179	750088	WT at post natal day 21, biological replicate 3	GSM820615	GSE33134	GPL1261	Public on Dec 31 2011	2011-10-21	2011-12-31	RNA	flow sorted rod photoreceptors	Mus musculus	tissue: Flow sorted Rod Photoreceptor; strain: C57BL/6; genotype: wild type; age: post natal day 21	total RNA	biotin	Retinas were dissociated and processed using FACS to recover rod photoreceptors expressing GFP.	Total RNA was extracted using RNAqueous-4PCR (Agilent).	Biotinylated cDNA were prepared for the MOE 430 2.0 arrays using Nugen Ovation RNA Amplification System starting with 40 ng of total RNA.	NA	NA	NA	NA	NA	NA	NA	NA	Following fragmentation and labelling, 2.2 ug of cDNA were hybridized at 45C for 18 hours. GeneChips were washed and scanner in the Affymetrix FS450.	WT at post natal day 21 flow sorted rod photoreceptor	We used GCRMA for normalization and background correction with median polish for probeset summarization. The analysis was done using the Gene Spring software from Agilent Technologies (http://www.genomics.agilent.com).	Name: Radu Cojocaru; Email: raducojo@gmail.com; Institute: Elsevier; Address: 5635 Fishers Lane, Suite 510; City: Rockville; State: MD; Zip/postal_code: 20852; Country: USA	ftp://ftp.ncbi.nlm.nih.gov/geo/samples/GSM820nnn/GSM820615/suppl/GSM820615_wt-P21-19-2.CEL.gz	45101	1	not.included
180	750089	WT at post natal day 21, biological replicate 4	GSM820616	GSE33134	GPL1261	Public on Dec 31 2011	2011-10-21	2011-12-31	RNA	flow sorted rod photoreceptors	Mus musculus	tissue: Flow sorted Rod Photoreceptor; strain: C57BL/6; genotype: wild type; age: post natal day 21	total RNA	biotin	Retinas were dissociated and processed using FACS to recover rod photoreceptors expressing GFP.	Total RNA was extracted using RNAqueous-4PCR (Agilent).	Biotinylated cDNA were prepared for the MOE 430 2.0 arrays using Nugen Ovation RNA Amplification System starting with 40 ng of total RNA.	NA	NA	NA	NA	NA	NA	NA	NA	Following fragmentation and labelling, 2.2 ug of cDNA were hybridized at 45C for 18 hours. GeneChips were washed and scanner in the Affymetrix FS450.	WT at post natal day 21 flow sorted rod photoreceptor	We used GCRMA for normalization and background correction with median polish for probeset summarization. The analysis was done using the Gene Spring software from Agilent Technologies (http://www.genomics.agilent.com).	Name: Radu Cojocaru; Email: raducojo@gmail.com; Institute: Elsevier; Address: 5635 Fishers Lane, Suite 510; City: Rockville; State: MD; Zip/postal_code: 20852; Country: USA	ftp://ftp.ncbi.nlm.nih.gov/geo/samples/GSM820nnn/GSM820616/suppl/GSM820616_wt-P21-20.CEL.gz	45101	1	not.included
181	1141543	intact retina from B6 mouse, biological rep1	GSM1306529	GSE54056	GPL1261	Public on Mar 06 2014	2014-01-14	2014-03-06	RNA	whole retina from B6 mouse	Mus musculus	tissue: neural retina; protocol: intact whole retina; strain: C57BL/6NCrSlc; age: 10 weeks old	total RNA	biotin	Eyes were enucleated from mice, and the neural retina was separated from the cornea, the sclera, the lens, the iris, the ciliary body, and the pigmented epithelium	Total RNA was extracted using RNeasy (QIAGEN) according to the manufacturer's instructions.	Biotinylated cRNA were prepared according to the standard Affymetrix protocol from 100 ng total RNA, according to the 3' IVT Expression Kit User Manual	NA	NA	NA	NA	NA	NA	NA	NA	Following fragmentation, 10 ug of cRNA were hybridized for 16 hr at 45C on GeneChip Mouse Genome 430.2.0 Array.	Gene expression data from B6 mouse retina; 11062101_B6primary1_MG430_2	The data were analyzed with RMA algorithm in the R/Bioconductor (http://www.bioconductor.org/) package	Name: Masayo Takahashi; Laboratory: Laboratory for Retinal Regeneration; Institute: RIKEN CDB; Address: 2-2-3 Minamimachi, Minatojima, Chu-o-ku; City: Kobe; State: Hyogo; Zip/postal_code: 650-0047; Country: Japan	ftp://ftp.ncbi.nlm.nih.gov/geo/samples/GSM1306nnn/GSM1306529/suppl/GSM1306529_11062101_B6primary1_MG430_2.CEL.gz	45101	1	whole.retina
182	1141544	intact retina from B6 mouse, biological rep2	GSM1306530	GSE54056	GPL1261	Public on Mar 06 2014	2014-01-14	2014-03-06	RNA	whole retina from B6 mouse	Mus musculus	tissue: neural retina; protocol: intact whole retina; strain: C57BL/6NCrSlc; age: 10 weeks old	total RNA	biotin	Eyes were enucleated from mice, and the neural retina was separated from the cornea, the sclera, the lens, the iris, the ciliary body, and the pigmented epithelium	Total RNA was extracted using RNeasy (QIAGEN) according to the manufacturer's instructions.	Biotinylated cRNA were prepared according to the standard Affymetrix protocol from 100 ng total RNA, according to the 3' IVT Expression Kit User Manual	NA	NA	NA	NA	NA	NA	NA	NA	Following fragmentation, 10 ug of cRNA were hybridized for 16 hr at 45C on GeneChip Mouse Genome 430.2.0 Array.	Gene expression data from B6 mouse retina; 11062102_B6primary2_MG430_2	The data were analyzed with RMA algorithm in the R/Bioconductor (http://www.bioconductor.org/) package	Name: Masayo Takahashi; Laboratory: Laboratory for Retinal Regeneration; Institute: RIKEN CDB; Address: 2-2-3 Minamimachi, Minatojima, Chu-o-ku; City: Kobe; State: Hyogo; Zip/postal_code: 650-0047; Country: Japan	ftp://ftp.ncbi.nlm.nih.gov/geo/samples/GSM1306nnn/GSM1306530/suppl/GSM1306530_11062102_B6primary2_MG430_2.CEL.gz	45101	1	whole.retina
183	1141545	B6 retinal explant cultured for three days, biological rep1	GSM1306531	GSE54056	GPL1261	Public on Mar 06 2014	2014-01-14	2014-03-06	RNA	whole retinal tissue from B6 mouse cultured for three days	Mus musculus	tissue: neural retina; protocol: retinal explant cultured for three days; strain: C57BL/6NCrSlc; age: 10 weeks old	total RNA	biotin	Eyes were enucleated from mice, and the neural retina was separated from the cornea, the sclera, the lens, the iris, the ciliary body, and the pigmented epithelium	Total RNA was extracted using RNeasy (QIAGEN) according to the manufacturer's instructions.	Biotinylated cRNA were prepared according to the standard Affymetrix protocol from 100 ng total RNA, according to the 3' IVT Expression Kit User Manual	NA	NA	NA	NA	NA	NA	NA	NA	Following fragmentation, 10 ug of cRNA were hybridized for 16 hr at 45C on GeneChip Mouse Genome 430.2.0 Array.	Gene expression data from damaged retina, B6; 11062103_B6DMSO1_MG430_2	The data were analyzed with RMA algorithm in the R/Bioconductor (http://www.bioconductor.org/) package	Name: Masayo Takahashi; Laboratory: Laboratory for Retinal Regeneration; Institute: RIKEN CDB; Address: 2-2-3 Minamimachi, Minatojima, Chu-o-ku; City: Kobe; State: Hyogo; Zip/postal_code: 650-0047; Country: Japan	ftp://ftp.ncbi.nlm.nih.gov/geo/samples/GSM1306nnn/GSM1306531/suppl/GSM1306531_11062103_B6DMSO1_MG430_2.CEL.gz	45101	1	not.included
184	1141546	B6 retinal explant cultured for three days, biological rep2	GSM1306532	GSE54056	GPL1261	Public on Mar 06 2014	2014-01-14	2014-03-06	RNA	whole retinal tissue from B6 mouse cultured for three days	Mus musculus	tissue: neural retina; protocol: retinal explant cultured for three days; strain: C57BL/6NCrSlc; age: 10 weeks old	total RNA	biotin	Eyes were enucleated from mice, and the neural retina was separated from the cornea, the sclera, the lens, the iris, the ciliary body, and the pigmented epithelium	Total RNA was extracted using RNeasy (QIAGEN) according to the manufacturer's instructions.	Biotinylated cRNA were prepared according to the standard Affymetrix protocol from 100 ng total RNA, according to the 3' IVT Expression Kit User Manual	NA	NA	NA	NA	NA	NA	NA	NA	Following fragmentation, 10 ug of cRNA were hybridized for 16 hr at 45C on GeneChip Mouse Genome 430.2.0 Array.	Gene expression data from damaged retina, B6; 11062104_B6DMSO2_MG430_2	The data were analyzed with RMA algorithm in the R/Bioconductor (http://www.bioconductor.org/) package	Name: Masayo Takahashi; Laboratory: Laboratory for Retinal Regeneration; Institute: RIKEN CDB; Address: 2-2-3 Minamimachi, Minatojima, Chu-o-ku; City: Kobe; State: Hyogo; Zip/postal_code: 650-0047; Country: Japan	ftp://ftp.ncbi.nlm.nih.gov/geo/samples/GSM1306nnn/GSM1306532/suppl/GSM1306532_11062104_B6DMSO2_MG430_2.CEL.gz	45101	1	not.included
185	1141547	B6 retinal explant cultured for three days with chir99021, biological rep1	GSM1306533	GSE54056	GPL1261	Public on Mar 06 2014	2014-01-14	2014-03-06	RNA	whole retinal tissue from B6 mouse cultured for three days with chir99021 (15uM)	Mus musculus	tissue: neural retina; protocol: retinal explant cultured for three days with chir99021; strain: C57BL/6NCrSlc; age: 10 weeks old	total RNA	biotin	Eyes were enucleated from mice, and the neural retina was separated from the cornea, the sclera, the lens, the iris, the ciliary body, and the pigmented epithelium	Total RNA was extracted using RNeasy (QIAGEN) according to the manufacturer's instructions.	Biotinylated cRNA were prepared according to the standard Affymetrix protocol from 100 ng total RNA, according to the 3' IVT Expression Kit User Manual	NA	NA	NA	NA	NA	NA	NA	NA	Following fragmentation, 10 ug of cRNA were hybridized for 16 hr at 45C on GeneChip Mouse Genome 430.2.0 Array.	Gene expression data from damaged retina supplemented with GSK3 inhibitor, B6; 11062105_B6chiron1_MG430_2	The data were analyzed with RMA algorithm in the R/Bioconductor (http://www.bioconductor.org/) package	Name: Masayo Takahashi; Laboratory: Laboratory for Retinal Regeneration; Institute: RIKEN CDB; Address: 2-2-3 Minamimachi, Minatojima, Chu-o-ku; City: Kobe; State: Hyogo; Zip/postal_code: 650-0047; Country: Japan	ftp://ftp.ncbi.nlm.nih.gov/geo/samples/GSM1306nnn/GSM1306533/suppl/GSM1306533_11062105_B6chiron1_MG430_2.CEL.gz	45101	1	not.included
186	1141548	B6 retinal explant cultured for three days with chir99021, biological rep2	GSM1306534	GSE54056	GPL1261	Public on Mar 06 2014	2014-01-14	2014-03-06	RNA	whole retinal tissue from B6 mouse cultured for three days with chir99021 (15uM)	Mus musculus	tissue: neural retina; protocol: retinal explant cultured for three days with chir99021; strain: C57BL/6NCrSlc; age: 10 weeks old	total RNA	biotin	Eyes were enucleated from mice, and the neural retina was separated from the cornea, the sclera, the lens, the iris, the ciliary body, and the pigmented epithelium	Total RNA was extracted using RNeasy (QIAGEN) according to the manufacturer's instructions.	Biotinylated cRNA were prepared according to the standard Affymetrix protocol from 100 ng total RNA, according to the 3' IVT Expression Kit User Manual	NA	NA	NA	NA	NA	NA	NA	NA	Following fragmentation, 10 ug of cRNA were hybridized for 16 hr at 45C on GeneChip Mouse Genome 430.2.0 Array.	Gene expression data from damaged retina supplemented with GSK3 inhibitor, B6; 11062106_B6chiron2_MG430_2	The data were analyzed with RMA algorithm in the R/Bioconductor (http://www.bioconductor.org/) package	Name: Masayo Takahashi; Laboratory: Laboratory for Retinal Regeneration; Institute: RIKEN CDB; Address: 2-2-3 Minamimachi, Minatojima, Chu-o-ku; City: Kobe; State: Hyogo; Zip/postal_code: 650-0047; Country: Japan	ftp://ftp.ncbi.nlm.nih.gov/geo/samples/GSM1306nnn/GSM1306534/suppl/GSM1306534_11062106_B6chiron2_MG430_2.CEL.gz	45101	1	not.included
187	1141549	intact retina from 129 mouse, biological rep1	GSM1306535	GSE54056	GPL1261	Public on Mar 06 2014	2014-01-14	2014-03-06	RNA	whole retina from 129 mouse	Mus musculus	tissue: neural retina; protocol: intact whole retina; strain: 129X1/SvJJmsSlc; age: 10 weeks old	total RNA	biotin	Eyes were enucleated from mice, and the neural retina was separated from the cornea, the sclera, the lens, the iris, the ciliary body, and the pigmented epithelium	Total RNA was extracted using RNeasy (QIAGEN) according to the manufacturer's instructions.	Biotinylated cRNA were prepared according to the standard Affymetrix protocol from 100 ng total RNA, according to the 3' IVT Expression Kit User Manual	NA	NA	NA	NA	NA	NA	NA	NA	Following fragmentation, 10 ug of cRNA were hybridized for 16 hr at 45C on GeneChip Mouse Genome 430.2.0 Array.	Gene expression data from 129 mouse retina; 11062107_129primary1_MG430_2	The data were analyzed with RMA algorithm in the R/Bioconductor (http://www.bioconductor.org/) package	Name: Masayo Takahashi; Laboratory: Laboratory for Retinal Regeneration; Institute: RIKEN CDB; Address: 2-2-3 Minamimachi, Minatojima, Chu-o-ku; City: Kobe; State: Hyogo; Zip/postal_code: 650-0047; Country: Japan	ftp://ftp.ncbi.nlm.nih.gov/geo/samples/GSM1306nnn/GSM1306535/suppl/GSM1306535_11062107_129primary1_MG430_2.CEL.gz	45101	1	not.included
188	1141550	intact retina from 129 mouse, biological rep2	GSM1306536	GSE54056	GPL1261	Public on Mar 06 2014	2014-01-14	2014-03-06	RNA	whole retina from 129 mouse	Mus musculus	tissue: neural retina; protocol: intact whole retina; strain: 129X1/SvJJmsSlc; age: 10 weeks old	total RNA	biotin	Eyes were enucleated from mice, and the neural retina was separated from the cornea, the sclera, the lens, the iris, the ciliary body, and the pigmented epithelium	Total RNA was extracted using RNeasy (QIAGEN) according to the manufacturer's instructions.	Biotinylated cRNA were prepared according to the standard Affymetrix protocol from 100 ng total RNA, according to the 3' IVT Expression Kit User Manual	NA	NA	NA	NA	NA	NA	NA	NA	Following fragmentation, 10 ug of cRNA were hybridized for 16 hr at 45C on GeneChip Mouse Genome 430.2.0 Array.	Gene expression data from 129 mouse retina; 11062108_129primary2_MG430_2	The data were analyzed with RMA algorithm in the R/Bioconductor (http://www.bioconductor.org/) package	Name: Masayo Takahashi; Laboratory: Laboratory for Retinal Regeneration; Institute: RIKEN CDB; Address: 2-2-3 Minamimachi, Minatojima, Chu-o-ku; City: Kobe; State: Hyogo; Zip/postal_code: 650-0047; Country: Japan	ftp://ftp.ncbi.nlm.nih.gov/geo/samples/GSM1306nnn/GSM1306536/suppl/GSM1306536_11062108_129primary2_MG430_2.CEL.gz	45101	1	not.included
189	1141551	129 retinal explant cultured for three days, biological rep1	GSM1306537	GSE54056	GPL1261	Public on Mar 06 2014	2014-01-14	2014-03-06	RNA	whole retinal tissue from 129 mouse cultured for three days	Mus musculus	tissue: neural retina; protocol: retinal explant cultured for three days; strain: 129X1/SvJJmsSlc; age: 10 weeks old	total RNA	biotin	Eyes were enucleated from mice, and the neural retina was separated from the cornea, the sclera, the lens, the iris, the ciliary body, and the pigmented epithelium	Total RNA was extracted using RNeasy (QIAGEN) according to the manufacturer's instructions.	Biotinylated cRNA were prepared according to the standard Affymetrix protocol from 100 ng total RNA, according to the 3' IVT Expression Kit User Manual	NA	NA	NA	NA	NA	NA	NA	NA	Following fragmentation, 10 ug of cRNA were hybridized for 16 hr at 45C on GeneChip Mouse Genome 430.2.0 Array.	Gene expression data from damaged retina, 129; 11062109_129DMSO1_MG430_2	The data were analyzed with RMA algorithm in the R/Bioconductor (http://www.bioconductor.org/) package	Name: Masayo Takahashi; Laboratory: Laboratory for Retinal Regeneration; Institute: RIKEN CDB; Address: 2-2-3 Minamimachi, Minatojima, Chu-o-ku; City: Kobe; State: Hyogo; Zip/postal_code: 650-0047; Country: Japan	ftp://ftp.ncbi.nlm.nih.gov/geo/samples/GSM1306nnn/GSM1306537/suppl/GSM1306537_11062109_129DMSO1_MG430_2.CEL.gz	45101	1	not.included
190	1141552	129 retinal explant cultured for three days, biological rep2	GSM1306538	GSE54056	GPL1261	Public on Mar 06 2014	2014-01-14	2014-03-06	RNA	whole retinal tissue from 129 mouse cultured for three days	Mus musculus	tissue: neural retina; protocol: retinal explant cultured for three days; strain: 129X1/SvJJmsSlc; age: 10 weeks old	total RNA	biotin	Eyes were enucleated from mice, and the neural retina was separated from the cornea, the sclera, the lens, the iris, the ciliary body, and the pigmented epithelium	Total RNA was extracted using RNeasy (QIAGEN) according to the manufacturer's instructions.	Biotinylated cRNA were prepared according to the standard Affymetrix protocol from 100 ng total RNA, according to the 3' IVT Expression Kit User Manual	NA	NA	NA	NA	NA	NA	NA	NA	Following fragmentation, 10 ug of cRNA were hybridized for 16 hr at 45C on GeneChip Mouse Genome 430.2.0 Array.	Gene expression data from damaged retina, 129; 11062110_129DMSO2_MG430_2	The data were analyzed with RMA algorithm in the R/Bioconductor (http://www.bioconductor.org/) package	Name: Masayo Takahashi; Laboratory: Laboratory for Retinal Regeneration; Institute: RIKEN CDB; Address: 2-2-3 Minamimachi, Minatojima, Chu-o-ku; City: Kobe; State: Hyogo; Zip/postal_code: 650-0047; Country: Japan	ftp://ftp.ncbi.nlm.nih.gov/geo/samples/GSM1306nnn/GSM1306538/suppl/GSM1306538_11062110_129DMSO2_MG430_2.CEL.gz	45101	1	not.included
191	1141553	129 retinal explant cultured for three days with chir99021, biological rep1	GSM1306539	GSE54056	GPL1261	Public on Mar 06 2014	2014-01-14	2014-03-06	RNA	whole retinal tissue from 129 mouse cultured for three days with chir99021 (15uM)	Mus musculus	tissue: neural retina; protocol: retinal explant cultured for three days with chir99021; strain: 129X1/SvJJmsSlc; age: 10 weeks old	total RNA	biotin	Eyes were enucleated from mice, and the neural retina was separated from the cornea, the sclera, the lens, the iris, the ciliary body, and the pigmented epithelium	Total RNA was extracted using RNeasy (QIAGEN) according to the manufacturer's instructions.	Biotinylated cRNA were prepared according to the standard Affymetrix protocol from 100 ng total RNA, according to the 3' IVT Expression Kit User Manual	NA	NA	NA	NA	NA	NA	NA	NA	Following fragmentation, 10 ug of cRNA were hybridized for 16 hr at 45C on GeneChip Mouse Genome 430.2.0 Array.	Gene expression data from damaged retina supplemented with GSK3 inhibitor, 129; 11062111_129chiron1_MG430_2	The data were analyzed with RMA algorithm in the R/Bioconductor (http://www.bioconductor.org/) package	Name: Masayo Takahashi; Laboratory: Laboratory for Retinal Regeneration; Institute: RIKEN CDB; Address: 2-2-3 Minamimachi, Minatojima, Chu-o-ku; City: Kobe; State: Hyogo; Zip/postal_code: 650-0047; Country: Japan	ftp://ftp.ncbi.nlm.nih.gov/geo/samples/GSM1306nnn/GSM1306539/suppl/GSM1306539_11062111_129chiron1_MG430_2.CEL.gz	45101	1	not.included
192	1141554	129 retinal explant cultured for three days with chir99021, biological rep2	GSM1306540	GSE54056	GPL1261	Public on Mar 06 2014	2014-01-14	2014-03-06	RNA	whole retinal tissue from 129 mouse cultured for three days with chir99021 (15uM)	Mus musculus	tissue: neural retina; protocol: retinal explant cultured for three days with chir99021; strain: 129X1/SvJJmsSlc; age: 10 weeks old	total RNA	biotin	Eyes were enucleated from mice, and the neural retina was separated from the cornea, the sclera, the lens, the iris, the ciliary body, and the pigmented epithelium	Total RNA was extracted using RNeasy (QIAGEN) according to the manufacturer's instructions.	Biotinylated cRNA were prepared according to the standard Affymetrix protocol from 100 ng total RNA, according to the 3' IVT Expression Kit User Manual	NA	NA	NA	NA	NA	NA	NA	NA	Following fragmentation, 10 ug of cRNA were hybridized for 16 hr at 45C on GeneChip Mouse Genome 430.2.0 Array.	Gene expression data from damaged retina supplemented with GSK3 inhibitor, 129; 11062112_129chiron2_MG430_2	The data were analyzed with RMA algorithm in the R/Bioconductor (http://www.bioconductor.org/) package	Name: Masayo Takahashi; Laboratory: Laboratory for Retinal Regeneration; Institute: RIKEN CDB; Address: 2-2-3 Minamimachi, Minatojima, Chu-o-ku; City: Kobe; State: Hyogo; Zip/postal_code: 650-0047; Country: Japan	ftp://ftp.ncbi.nlm.nih.gov/geo/samples/GSM1306nnn/GSM1306540/suppl/GSM1306540_11062112_129chiron2_MG430_2.CEL.gz	45101	1	not.included
193	1269203	OC2-KO adult 1	GSM1397409	GSE57918	GPL1261	Public on Nov 11 2014	2014-05-22	2014-11-11	RNA	OC2-KO adult retina	Mus musculus	tissue: retina; Stage: adult; onecut genotype: OC2-KO	total RNA	biotin	Retinas were isolated from adult eyes and rinsed in 1X PBS.	Trireagent extraction of total RNA was performed according to the manufacturer's instructions.	Total RNA wa amplified, biotinylated, and fragmented using the Ambion MessageAmp III RNA amplification kit according to manufacturer's instructions.	NA	NA	NA	NA	NA	NA	NA	NA	Amplified RNA was hybridized to Affymetrix GeneChip Mouse Genome 430 2.0 arrays at the Iowa State University GeneChip Facility.	Gene expression information from isolated adult retinas	The data were analyzed with Microarray Suite version 5.0 (MAS 5.0) using Affymetrix default analysis settings and global scaling as normalization method.	Name: Jeffrey,M,Trimarchi; Email: jtrimarc@iastate.edu; Phone: 2172190210; Laboratory: Trimarchi; Department: GDCB; Institute: Iowa State University; Address: 3188 Molecular Biology Building; City: Ames; State: IA; Zip/postal_code: 50014; Country: USA	ftp://ftp.ncbi.nlm.nih.gov/geo/samples/GSM1397nnn/GSM1397409/suppl/GSM1397409_OC2_adult_1.CEL.gz; ftp://ftp.ncbi.nlm.nih.gov/geo/samples/GSM1397nnn/GSM1397409/suppl/GSM1397409_OC2_adult_1.mas5.CHP.gz	45101	1	not.included
194	1269204	OC2-KO adult 2	GSM1397410	GSE57918	GPL1261	Public on Nov 11 2014	2014-05-22	2014-11-11	RNA	OC2-KO adult retina	Mus musculus	tissue: retina; Stage: adult; onecut genotype: OC2-KO	total RNA	biotin	Retinas were isolated from adult eyes and rinsed in 1X PBS.	Trireagent extraction of total RNA was performed according to the manufacturer's instructions.	Total RNA wa amplified, biotinylated, and fragmented using the Ambion MessageAmp III RNA amplification kit according to manufacturer's instructions.	NA	NA	NA	NA	NA	NA	NA	NA	Amplified RNA was hybridized to Affymetrix GeneChip Mouse Genome 430 2.0 arrays at the Iowa State University GeneChip Facility.	Gene expression information from isolated adult retinas	The data were analyzed with Microarray Suite version 5.0 (MAS 5.0) using Affymetrix default analysis settings and global scaling as normalization method.	Name: Jeffrey,M,Trimarchi; Email: jtrimarc@iastate.edu; Phone: 2172190210; Laboratory: Trimarchi; Department: GDCB; Institute: Iowa State University; Address: 3188 Molecular Biology Building; City: Ames; State: IA; Zip/postal_code: 50014; Country: USA	ftp://ftp.ncbi.nlm.nih.gov/geo/samples/GSM1397nnn/GSM1397410/suppl/GSM1397410_OC2_adult_2.CEL.gz; ftp://ftp.ncbi.nlm.nih.gov/geo/samples/GSM1397nnn/GSM1397410/suppl/GSM1397410_OC2_adult_2.mas5.CHP.gz	45101	1	not.included
195	1269205	OC2-WT adult 1	GSM1397411	GSE57918	GPL1261	Public on Nov 11 2014	2014-05-22	2014-11-11	RNA	OC2-WT adult retina	Mus musculus	tissue: retina; Stage: adult; onecut genotype: WT	total RNA	biotin	Retinas were isolated from adult eyes and rinsed in 1X PBS.	Trireagent extraction of total RNA was performed according to the manufacturer's instructions.	Total RNA wa amplified, biotinylated, and fragmented using the Ambion MessageAmp III RNA amplification kit according to manufacturer's instructions.	NA	NA	NA	NA	NA	NA	NA	NA	Amplified RNA was hybridized to Affymetrix GeneChip Mouse Genome 430 2.0 arrays at the Iowa State University GeneChip Facility.	Gene expression information from isolated adult retinas	The data were analyzed with Microarray Suite version 5.0 (MAS 5.0) using Affymetrix default analysis settings and global scaling as normalization method.	Name: Jeffrey,M,Trimarchi; Email: jtrimarc@iastate.edu; Phone: 2172190210; Laboratory: Trimarchi; Department: GDCB; Institute: Iowa State University; Address: 3188 Molecular Biology Building; City: Ames; State: IA; Zip/postal_code: 50014; Country: USA	ftp://ftp.ncbi.nlm.nih.gov/geo/samples/GSM1397nnn/GSM1397411/suppl/GSM1397411_WT_adult_OC2_1.CEL.gz; ftp://ftp.ncbi.nlm.nih.gov/geo/samples/GSM1397nnn/GSM1397411/suppl/GSM1397411_WT_adult_OC2_1.mas5.CHP.gz	45101	1	whole.retina
196	1269206	OC2-WT adult 2	GSM1397412	GSE57918	GPL1261	Public on Nov 11 2014	2014-05-22	2014-11-11	RNA	OC2-WT adult retina	Mus musculus	tissue: retina; Stage: adult; onecut genotype: WT	total RNA	biotin	Retinas were isolated from adult eyes and rinsed in 1X PBS.	Trireagent extraction of total RNA was performed according to the manufacturer's instructions.	Total RNA wa amplified, biotinylated, and fragmented using the Ambion MessageAmp III RNA amplification kit according to manufacturer's instructions.	NA	NA	NA	NA	NA	NA	NA	NA	Amplified RNA was hybridized to Affymetrix GeneChip Mouse Genome 430 2.0 arrays at the Iowa State University GeneChip Facility.	Gene expression information from isolated adult retinas	The data were analyzed with Microarray Suite version 5.0 (MAS 5.0) using Affymetrix default analysis settings and global scaling as normalization method.	Name: Jeffrey,M,Trimarchi; Email: jtrimarc@iastate.edu; Phone: 2172190210; Laboratory: Trimarchi; Department: GDCB; Institute: Iowa State University; Address: 3188 Molecular Biology Building; City: Ames; State: IA; Zip/postal_code: 50014; Country: USA	ftp://ftp.ncbi.nlm.nih.gov/geo/samples/GSM1397nnn/GSM1397412/suppl/GSM1397412_WT_adult_OC2_2.CEL.gz; ftp://ftp.ncbi.nlm.nih.gov/geo/samples/GSM1397nnn/GSM1397412/suppl/GSM1397412_WT_adult_OC2_2.mas5.CHP.gz	45101	1	whole.retina
197	1269570	WT OC2 Adult 3	GSM1442336	GSE57918	GPL1261	Public on Nov 11 2014	2014-07-22	2014-11-12	RNA	OC2-WT adult retina	Mus musculus	tissue: retina; Stage: adult; onecut genotype: OC2-WT	total RNA	biotin	Retinas were isolated from adult eyes and rinsed in 1X PBS.	Trireagent extraction of total RNA was performed according to the manufacturer's instructions.	Total RNA wa amplified, biotinylated, and fragmented using the Ambion MessageAmp III RNA amplification kit according to manufacturer's instructions.	NA	NA	NA	NA	NA	NA	NA	NA	Amplified RNA was hybridized to Affymetrix GeneChip Mouse Genome 430 2.0 arrays at the Iowa State University GeneChip Facility.	Gene expression information from isolated adult retinas	The data were analyzed with Microarray Suite version 5.0 (MAS 5.0) using Affymetrix default analysis settings and global scaling as normalization method.	Name: Jeffrey,M,Trimarchi; Email: jtrimarc@iastate.edu; Phone: 2172190210; Laboratory: Trimarchi; Department: GDCB; Institute: Iowa State University; Address: 3188 Molecular Biology Building; City: Ames; State: IA; Zip/postal_code: 50014; Country: USA	ftp://ftp.ncbi.nlm.nih.gov/geo/samples/GSM1442nnn/GSM1442336/suppl/GSM1442336_WT_OC2_Adult_3.CEL.gz; ftp://ftp.ncbi.nlm.nih.gov/geo/samples/GSM1442nnn/GSM1442336/suppl/GSM1442336_WT_OC2_Adult_3.CHP.gz	45101	1	whole.retina
198	1269571	KO OC2 Adult 3	GSM1442337	GSE57918	GPL1261	Public on Nov 11 2014	2014-07-22	2014-11-12	RNA	OC2-KO adult retina	Mus musculus	tissue: retina; Stage: adult; onecut genotype: OC2-KO	total RNA	biotin	Retinas were isolated from adult eyes and rinsed in 1X PBS.	Trireagent extraction of total RNA was performed according to the manufacturer's instructions.	Total RNA wa amplified, biotinylated, and fragmented using the Ambion MessageAmp III RNA amplification kit according to manufacturer's instructions.	NA	NA	NA	NA	NA	NA	NA	NA	Amplified RNA was hybridized to Affymetrix GeneChip Mouse Genome 430 2.0 arrays at the Iowa State University GeneChip Facility.	Gene expression information from isolated adult retinas	The data were analyzed with Microarray Suite version 5.0 (MAS 5.0) using Affymetrix default analysis settings and global scaling as normalization method.	Name: Jeffrey,M,Trimarchi; Email: jtrimarc@iastate.edu; Phone: 2172190210; Laboratory: Trimarchi; Department: GDCB; Institute: Iowa State University; Address: 3188 Molecular Biology Building; City: Ames; State: IA; Zip/postal_code: 50014; Country: USA	ftp://ftp.ncbi.nlm.nih.gov/geo/samples/GSM1442nnn/GSM1442337/suppl/GSM1442337_KO_OC2_Adult_3.CEL.gz; ftp://ftp.ncbi.nlm.nih.gov/geo/samples/GSM1442nnn/GSM1442337/suppl/GSM1442337_KO_OC2_Adult_3.CHP.gz	45101	1	not.included
199	1888523	RPE BSS day 7 bio rep1	GSM1208403	GSE49872	GPL1261	Public on Aug 01 2016	2013-08-14	2016-08-01	RNA	RPE BSS control day 7	Mus musculus	strain: C57BL6/J; gender: males; organ: eye; tissue: RPE/choroid; treatment: BSS control; day: 7	total RNA	biotin	Animals were sacrificed within CO2 chamber, eyes were enucleated, disected, retinal tissue was removed and quicky immersed into 300ul RNALater. Samples were stored in RNALater at -20C till the total RNA isolation step.	Total RNA was isolated using Qiagen RNeasy kit according to the manufacturer's instructions.	Biotinylated cRNA were prepared according to the two-cycle Affymetrix protocol from 0.100 ug total RNA (Expression Analysis Technical Manual, 2001, Affymetrix).	NA	NA	NA	NA	NA	NA	NA	NA	Following fragmentation, 10 ug of cRNA were hybridized for 16 hr at 45C on GeneChip Mouse 430 2.0 Genome Array. GeneChips were washed and stained in the Affymetrix Fluidics Station 450.	Gene expression data at day 7 from the eyes intravitreally injected with BSS at day 0	The data were analyzed with GeneSpring GX 11 using RMA algorhitm as analysis and normalization method.	Name: Zeljka Smit-McBride; Email: zsmcbride@ucdavis.edu; Laboratory: Vitreoretinal Research Lab; Department: Ophthalmology; Institute: UC Davis; Address: One Shields Ave, Tupper Hall #2403; City: Davis; State: CA; Zip/postal_code: 95616; Country: USA	ftp://ftp.ncbi.nlm.nih.gov/geo/samples/GSM1208nnn/GSM1208403/suppl/GSM1208403_Con-001_RPE.CEL.gz	45101	1	RPE
200	1888524	RPE BSS day 7 bio rep2	GSM1208404	GSE49872	GPL1261	Public on Aug 01 2016	2013-08-14	2016-08-01	RNA	RPE BSS control day 7	Mus musculus	strain: C57BL6/J; gender: males; organ: eye; tissue: RPE/choroid; treatment: BSS control; day: 7	total RNA	biotin	Animals were sacrificed within CO2 chamber, eyes were enucleated, disected, retinal tissue was removed and quicky immersed into 300ul RNALater. Samples were stored in RNALater at -20C till the total RNA isolation step.	Total RNA was isolated using Qiagen RNeasy kit according to the manufacturer's instructions.	Biotinylated cRNA were prepared according to the two-cycle Affymetrix protocol from 0.100 ug total RNA (Expression Analysis Technical Manual, 2001, Affymetrix).	NA	NA	NA	NA	NA	NA	NA	NA	Following fragmentation, 10 ug of cRNA were hybridized for 16 hr at 45C on GeneChip Mouse 430 2.0 Genome Array. GeneChips were washed and stained in the Affymetrix Fluidics Station 450.	Gene expression data at day 7 from the eyes intravitreally injected with BSS at day 0	The data were analyzed with GeneSpring GX 11 using RMA algorhitm as analysis and normalization method.	Name: Zeljka Smit-McBride; Email: zsmcbride@ucdavis.edu; Laboratory: Vitreoretinal Research Lab; Department: Ophthalmology; Institute: UC Davis; Address: One Shields Ave, Tupper Hall #2403; City: Davis; State: CA; Zip/postal_code: 95616; Country: USA	ftp://ftp.ncbi.nlm.nih.gov/geo/samples/GSM1208nnn/GSM1208404/suppl/GSM1208404_Con-003_RPE.CEL.gz	45101	1	RPE
201	1888525	RPE BSS day 7 bio rep3	GSM1208405	GSE49872	GPL1261	Public on Aug 01 2016	2013-08-14	2016-08-01	RNA	RPE BSS control day 7	Mus musculus	strain: C57BL6/J; gender: males; organ: eye; tissue: RPE/choroid; treatment: BSS control; day: 7	total RNA	biotin	Animals were sacrificed within CO2 chamber, eyes were enucleated, disected, retinal tissue was removed and quicky immersed into 300ul RNALater. Samples were stored in RNALater at -20C till the total RNA isolation step.	Total RNA was isolated using Qiagen RNeasy kit according to the manufacturer's instructions.	Biotinylated cRNA were prepared according to the two-cycle Affymetrix protocol from 0.100 ug total RNA (Expression Analysis Technical Manual, 2001, Affymetrix).	NA	NA	NA	NA	NA	NA	NA	NA	Following fragmentation, 10 ug of cRNA were hybridized for 16 hr at 45C on GeneChip Mouse 430 2.0 Genome Array. GeneChips were washed and stained in the Affymetrix Fluidics Station 450.	Gene expression data at day 7 from the eyes intravitreally injected with BSS at day 0	The data were analyzed with GeneSpring GX 11 using RMA algorhitm as analysis and normalization method.	Name: Zeljka Smit-McBride; Email: zsmcbride@ucdavis.edu; Laboratory: Vitreoretinal Research Lab; Department: Ophthalmology; Institute: UC Davis; Address: One Shields Ave, Tupper Hall #2403; City: Davis; State: CA; Zip/postal_code: 95616; Country: USA	ftp://ftp.ncbi.nlm.nih.gov/geo/samples/GSM1208nnn/GSM1208405/suppl/GSM1208405_Con-004_RPE.CEL.gz	45101	1	RPE
202	1888526	RPE DEX day 7 bio rep1	GSM1208406	GSE49872	GPL1261	Public on Aug 01 2016	2013-08-14	2016-08-01	RNA	RPE DEX treatment day 7	Mus musculus	strain: C57BL6/J; gender: males; organ: eye; tissue: RPE/choroid; treatment: DEX; day: 7	total RNA	biotin	Animals were sacrificed within CO2 chamber, eyes were enucleated, disected, retinal tissue was removed and quicky immersed into 300ul RNALater. Samples were stored in RNALater at -20C till the total RNA isolation step.	Total RNA was isolated using Qiagen RNeasy kit according to the manufacturer's instructions.	Biotinylated cRNA were prepared according to the two-cycle Affymetrix protocol from 0.100 ug total RNA (Expression Analysis Technical Manual, 2001, Affymetrix).	NA	NA	NA	NA	NA	NA	NA	NA	Following fragmentation, 10 ug of cRNA were hybridized for 16 hr at 45C on GeneChip Mouse 430 2.0 Genome Array. GeneChips were washed and stained in the Affymetrix Fluidics Station 450.	Gene expression data at day 7 from the eyes intravitreally injected with DEX at day 0	The data were analyzed with GeneSpring GX 11 using RMA algorhitm as analysis and normalization method.	Name: Zeljka Smit-McBride; Email: zsmcbride@ucdavis.edu; Laboratory: Vitreoretinal Research Lab; Department: Ophthalmology; Institute: UC Davis; Address: One Shields Ave, Tupper Hall #2403; City: Davis; State: CA; Zip/postal_code: 95616; Country: USA	ftp://ftp.ncbi.nlm.nih.gov/geo/samples/GSM1208nnn/GSM1208406/suppl/GSM1208406_Dex-005_RPE.CEL.gz	45101	1	not.included
203	1888527	RPE DEX day 7 bio rep2	GSM1208407	GSE49872	GPL1261	Public on Aug 01 2016	2013-08-14	2016-08-01	RNA	RPE DEX treatment day 7	Mus musculus	strain: C57BL6/J; gender: males; organ: eye; tissue: RPE/choroid; treatment: DEX; day: 7	total RNA	biotin	Animals were sacrificed within CO2 chamber, eyes were enucleated, disected, retinal tissue was removed and quicky immersed into 300ul RNALater. Samples were stored in RNALater at -20C till the total RNA isolation step.	Total RNA was isolated using Qiagen RNeasy kit according to the manufacturer's instructions.	Biotinylated cRNA were prepared according to the two-cycle Affymetrix protocol from 0.100 ug total RNA (Expression Analysis Technical Manual, 2001, Affymetrix).	NA	NA	NA	NA	NA	NA	NA	NA	Following fragmentation, 10 ug of cRNA were hybridized for 16 hr at 45C on GeneChip Mouse 430 2.0 Genome Array. GeneChips were washed and stained in the Affymetrix Fluidics Station 450.	Gene expression data at day 7 from the eyes intravitreally injected with DEX at day 0	The data were analyzed with GeneSpring GX 11 using RMA algorhitm as analysis and normalization method.	Name: Zeljka Smit-McBride; Email: zsmcbride@ucdavis.edu; Laboratory: Vitreoretinal Research Lab; Department: Ophthalmology; Institute: UC Davis; Address: One Shields Ave, Tupper Hall #2403; City: Davis; State: CA; Zip/postal_code: 95616; Country: USA	ftp://ftp.ncbi.nlm.nih.gov/geo/samples/GSM1208nnn/GSM1208407/suppl/GSM1208407_Dex-007_RPE.CEL.gz	45101	1	not.included
204	1888528	RPE DEX day 7 bio rep3	GSM1208408	GSE49872	GPL1261	Public on Aug 01 2016	2013-08-14	2016-08-01	RNA	RPE DEX treatment day 7	Mus musculus	strain: C57BL6/J; gender: males; organ: eye; tissue: RPE/choroid; treatment: DEX; day: 7	total RNA	biotin	Animals were sacrificed within CO2 chamber, eyes were enucleated, disected, retinal tissue was removed and quicky immersed into 300ul RNALater. Samples were stored in RNALater at -20C till the total RNA isolation step.	Total RNA was isolated using Qiagen RNeasy kit according to the manufacturer's instructions.	Biotinylated cRNA were prepared according to the two-cycle Affymetrix protocol from 0.100 ug total RNA (Expression Analysis Technical Manual, 2001, Affymetrix).	NA	NA	NA	NA	NA	NA	NA	NA	Following fragmentation, 10 ug of cRNA were hybridized for 16 hr at 45C on GeneChip Mouse 430 2.0 Genome Array. GeneChips were washed and stained in the Affymetrix Fluidics Station 450.	Gene expression data at day 7 from the eyes intravitreally injected with DEX at day 0	The data were analyzed with GeneSpring GX 11 using RMA algorhitm as analysis and normalization method.	Name: Zeljka Smit-McBride; Email: zsmcbride@ucdavis.edu; Laboratory: Vitreoretinal Research Lab; Department: Ophthalmology; Institute: UC Davis; Address: One Shields Ave, Tupper Hall #2403; City: Davis; State: CA; Zip/postal_code: 95616; Country: USA	ftp://ftp.ncbi.nlm.nih.gov/geo/samples/GSM1208nnn/GSM1208408/suppl/GSM1208408_Dex-008_RPE.CEL.gz	45101	1	not.included
205	1888529	RPE TAA day 7 bio rep1	GSM1208409	GSE49872	GPL1261	Public on Aug 01 2016	2013-08-14	2016-08-01	RNA	RPE TAA treatment day 7	Mus musculus	strain: C57BL6/J; gender: males; organ: eye; tissue: RPE/choroid; treatment: TAA; day: 7	total RNA	biotin	Animals were sacrificed within CO2 chamber, eyes were enucleated, disected, retinal tissue was removed and quicky immersed into 300ul RNALater. Samples were stored in RNALater at -20C till the total RNA isolation step.	Total RNA was isolated using Qiagen RNeasy kit according to the manufacturer's instructions.	Biotinylated cRNA were prepared according to the two-cycle Affymetrix protocol from 0.100 ug total RNA (Expression Analysis Technical Manual, 2001, Affymetrix).	NA	NA	NA	NA	NA	NA	NA	NA	Following fragmentation, 10 ug of cRNA were hybridized for 16 hr at 45C on GeneChip Mouse 430 2.0 Genome Array. GeneChips were washed and stained in the Affymetrix Fluidics Station 450.	Gene expression data at day 7 from the eyes intravitreally injected with TAA at day 0	The data were analyzed with GeneSpring GX 11 using RMA algorhitm as analysis and normalization method.	Name: Zeljka Smit-McBride; Email: zsmcbride@ucdavis.edu; Laboratory: Vitreoretinal Research Lab; Department: Ophthalmology; Institute: UC Davis; Address: One Shields Ave, Tupper Hall #2403; City: Davis; State: CA; Zip/postal_code: 95616; Country: USA	ftp://ftp.ncbi.nlm.nih.gov/geo/samples/GSM1208nnn/GSM1208409/suppl/GSM1208409_TAA-009_RPE.CEL.gz	45101	1	not.included
206	1888530	RPE TAA day 7 bio rep2	GSM1208410	GSE49872	GPL1261	Public on Aug 01 2016	2013-08-14	2016-08-01	RNA	RPE TAA treatment day 7	Mus musculus	strain: C57BL6/J; gender: males; organ: eye; tissue: RPE/choroid; treatment: TAA; day: 7	total RNA	biotin	Animals were sacrificed within CO2 chamber, eyes were enucleated, disected, retinal tissue was removed and quicky immersed into 300ul RNALater. Samples were stored in RNALater at -20C till the total RNA isolation step.	Total RNA was isolated using Qiagen RNeasy kit according to the manufacturer's instructions.	Biotinylated cRNA were prepared according to the two-cycle Affymetrix protocol from 0.100 ug total RNA (Expression Analysis Technical Manual, 2001, Affymetrix).	NA	NA	NA	NA	NA	NA	NA	NA	Following fragmentation, 10 ug of cRNA were hybridized for 16 hr at 45C on GeneChip Mouse 430 2.0 Genome Array. GeneChips were washed and stained in the Affymetrix Fluidics Station 450.	Gene expression data at day 7 from the eyes intravitreally injected with TAA at day 0	The data were analyzed with GeneSpring GX 11 using RMA algorhitm as analysis and normalization method.	Name: Zeljka Smit-McBride; Email: zsmcbride@ucdavis.edu; Laboratory: Vitreoretinal Research Lab; Department: Ophthalmology; Institute: UC Davis; Address: One Shields Ave, Tupper Hall #2403; City: Davis; State: CA; Zip/postal_code: 95616; Country: USA	ftp://ftp.ncbi.nlm.nih.gov/geo/samples/GSM1208nnn/GSM1208410/suppl/GSM1208410_TAA-011_RPE.CEL.gz	45101	1	not.included
207	1888531	RPE TAA day 7 bio rep3	GSM1208411	GSE49872	GPL1261	Public on Aug 01 2016	2013-08-14	2016-08-01	RNA	RPE TAA treatment day 7	Mus musculus	strain: C57BL6/J; gender: males; organ: eye; tissue: RPE/choroid; treatment: TAA; day: 7	total RNA	biotin	Animals were sacrificed within CO2 chamber, eyes were enucleated, disected, retinal tissue was removed and quicky immersed into 300ul RNALater. Samples were stored in RNALater at -20C till the total RNA isolation step.	Total RNA was isolated using Qiagen RNeasy kit according to the manufacturer's instructions.	Biotinylated cRNA were prepared according to the two-cycle Affymetrix protocol from 0.100 ug total RNA (Expression Analysis Technical Manual, 2001, Affymetrix).	NA	NA	NA	NA	NA	NA	NA	NA	Following fragmentation, 10 ug of cRNA were hybridized for 16 hr at 45C on GeneChip Mouse 430 2.0 Genome Array. GeneChips were washed and stained in the Affymetrix Fluidics Station 450.	Gene expression data at day 7 from the eyes intravitreally injected with TAA at day 0	The data were analyzed with GeneSpring GX 11 using RMA algorhitm as analysis and normalization method.	Name: Zeljka Smit-McBride; Email: zsmcbride@ucdavis.edu; Laboratory: Vitreoretinal Research Lab; Department: Ophthalmology; Institute: UC Davis; Address: One Shields Ave, Tupper Hall #2403; City: Davis; State: CA; Zip/postal_code: 95616; Country: USA	ftp://ftp.ncbi.nlm.nih.gov/geo/samples/GSM1208nnn/GSM1208411/suppl/GSM1208411_TAA-012_RPE.CEL.gz	45101	1	not.included
208	1888532	RPE BSS day 30 bio rep1	GSM1208412	GSE49872	GPL1261	Public on Aug 01 2016	2013-08-14	2016-08-01	RNA	RPE BSS control day 30	Mus musculus	strain: C57BL6/J; gender: males; organ: eye; tissue: RPE/choroid; treatment: BSS control; day: 30	total RNA	biotin	Animals were sacrificed within CO2 chamber, eyes were enucleated, disected, retinal tissue was removed and quicky immersed into 300ul RNALater. Samples were stored in RNALater at -20C till the total RNA isolation step.	Total RNA was isolated using Qiagen RNeasy kit according to the manufacturer's instructions.	Biotinylated cRNA were prepared according to the two-cycle Affymetrix protocol from 0.100 ug total RNA (Expression Analysis Technical Manual, 2001, Affymetrix).	NA	NA	NA	NA	NA	NA	NA	NA	Following fragmentation, 10 ug of cRNA were hybridized for 16 hr at 45C on GeneChip Mouse 430 2.0 Genome Array. GeneChips were washed and stained in the Affymetrix Fluidics Station 450.	Gene expression data at day 30 from the eyes intravitreally injected with BSS at day 0	The data were analyzed with GeneSpring GX 11 using RMA algorhitm as analysis and normalization method.	Name: Zeljka Smit-McBride; Email: zsmcbride@ucdavis.edu; Laboratory: Vitreoretinal Research Lab; Department: Ophthalmology; Institute: UC Davis; Address: One Shields Ave, Tupper Hall #2403; City: Davis; State: CA; Zip/postal_code: 95616; Country: USA	ftp://ftp.ncbi.nlm.nih.gov/geo/samples/GSM1208nnn/GSM1208412/suppl/GSM1208412_Con-013_RPE.CEL.gz	45101	1	RPE
209	1888533	RPE BSS day 30 bio rep2	GSM1208413	GSE49872	GPL1261	Public on Aug 01 2016	2013-08-14	2016-08-01	RNA	RPE BSS control day 30	Mus musculus	strain: C57BL6/J; gender: males; organ: eye; tissue: RPE/choroid; treatment: BSS control; day: 30	total RNA	biotin	Animals were sacrificed within CO2 chamber, eyes were enucleated, disected, retinal tissue was removed and quicky immersed into 300ul RNALater. Samples were stored in RNALater at -20C till the total RNA isolation step.	Total RNA was isolated using Qiagen RNeasy kit according to the manufacturer's instructions.	Biotinylated cRNA were prepared according to the two-cycle Affymetrix protocol from 0.100 ug total RNA (Expression Analysis Technical Manual, 2001, Affymetrix).	NA	NA	NA	NA	NA	NA	NA	NA	Following fragmentation, 10 ug of cRNA were hybridized for 16 hr at 45C on GeneChip Mouse 430 2.0 Genome Array. GeneChips were washed and stained in the Affymetrix Fluidics Station 450.	Gene expression data at day 30 from the eyes intravitreally injected with BSS at day 0	The data were analyzed with GeneSpring GX 11 using RMA algorhitm as analysis and normalization method.	Name: Zeljka Smit-McBride; Email: zsmcbride@ucdavis.edu; Laboratory: Vitreoretinal Research Lab; Department: Ophthalmology; Institute: UC Davis; Address: One Shields Ave, Tupper Hall #2403; City: Davis; State: CA; Zip/postal_code: 95616; Country: USA	ftp://ftp.ncbi.nlm.nih.gov/geo/samples/GSM1208nnn/GSM1208413/suppl/GSM1208413_Con-014_RPE.CEL.gz	45101	1	RPE
210	1888534	RPE BSS day 30 bio rep3	GSM1208414	GSE49872	GPL1261	Public on Aug 01 2016	2013-08-14	2016-08-01	RNA	RPE BSS control day 30	Mus musculus	strain: C57BL6/J; gender: males; organ: eye; tissue: RPE/choroid; treatment: BSS control; day: 30	total RNA	biotin	Animals were sacrificed within CO2 chamber, eyes were enucleated, disected, retinal tissue was removed and quicky immersed into 300ul RNALater. Samples were stored in RNALater at -20C till the total RNA isolation step.	Total RNA was isolated using Qiagen RNeasy kit according to the manufacturer's instructions.	Biotinylated cRNA were prepared according to the two-cycle Affymetrix protocol from 0.100 ug total RNA (Expression Analysis Technical Manual, 2001, Affymetrix).	NA	NA	NA	NA	NA	NA	NA	NA	Following fragmentation, 10 ug of cRNA were hybridized for 16 hr at 45C on GeneChip Mouse 430 2.0 Genome Array. GeneChips were washed and stained in the Affymetrix Fluidics Station 450.	Gene expression data at day 30 from the eyes intravitreally injected with BSS at day 0	The data were analyzed with GeneSpring GX 11 using RMA algorhitm as analysis and normalization method.	Name: Zeljka Smit-McBride; Email: zsmcbride@ucdavis.edu; Laboratory: Vitreoretinal Research Lab; Department: Ophthalmology; Institute: UC Davis; Address: One Shields Ave, Tupper Hall #2403; City: Davis; State: CA; Zip/postal_code: 95616; Country: USA	ftp://ftp.ncbi.nlm.nih.gov/geo/samples/GSM1208nnn/GSM1208414/suppl/GSM1208414_Con-016_RPE.CEL.gz	45101	1	RPE
211	1888535	RPE DEX day 30 bio rep1	GSM1208415	GSE49872	GPL1261	Public on Aug 01 2016	2013-08-14	2016-08-01	RNA	RPE DEX treatment day 30	Mus musculus	strain: C57BL6/J; gender: males; organ: eye; tissue: RPE/choroid; treatment: DEX; day: 30	total RNA	biotin	Animals were sacrificed within CO2 chamber, eyes were enucleated, disected, retinal tissue was removed and quicky immersed into 300ul RNALater. Samples were stored in RNALater at -20C till the total RNA isolation step.	Total RNA was isolated using Qiagen RNeasy kit according to the manufacturer's instructions.	Biotinylated cRNA were prepared according to the two-cycle Affymetrix protocol from 0.100 ug total RNA (Expression Analysis Technical Manual, 2001, Affymetrix).	NA	NA	NA	NA	NA	NA	NA	NA	Following fragmentation, 10 ug of cRNA were hybridized for 16 hr at 45C on GeneChip Mouse 430 2.0 Genome Array. GeneChips were washed and stained in the Affymetrix Fluidics Station 450.	Gene expression data at day 30 from the eyes intravitreally injected with DEX at day 0	The data were analyzed with GeneSpring GX 11 using RMA algorhitm as analysis and normalization method.	Name: Zeljka Smit-McBride; Email: zsmcbride@ucdavis.edu; Laboratory: Vitreoretinal Research Lab; Department: Ophthalmology; Institute: UC Davis; Address: One Shields Ave, Tupper Hall #2403; City: Davis; State: CA; Zip/postal_code: 95616; Country: USA	ftp://ftp.ncbi.nlm.nih.gov/geo/samples/GSM1208nnn/GSM1208415/suppl/GSM1208415_Dex-018_RPE.CEL.gz	45101	1	not.included
212	1888536	RPE DEX day 30 bio rep2	GSM1208416	GSE49872	GPL1261	Public on Aug 01 2016	2013-08-14	2016-08-01	RNA	RPE DEX treatment day 30	Mus musculus	strain: C57BL6/J; gender: males; organ: eye; tissue: RPE/choroid; treatment: DEX; day: 30	total RNA	biotin	Animals were sacrificed within CO2 chamber, eyes were enucleated, disected, retinal tissue was removed and quicky immersed into 300ul RNALater. Samples were stored in RNALater at -20C till the total RNA isolation step.	Total RNA was isolated using Qiagen RNeasy kit according to the manufacturer's instructions.	Biotinylated cRNA were prepared according to the two-cycle Affymetrix protocol from 0.100 ug total RNA (Expression Analysis Technical Manual, 2001, Affymetrix).	NA	NA	NA	NA	NA	NA	NA	NA	Following fragmentation, 10 ug of cRNA were hybridized for 16 hr at 45C on GeneChip Mouse 430 2.0 Genome Array. GeneChips were washed and stained in the Affymetrix Fluidics Station 450.	Gene expression data at day 30 from the eyes intravitreally injected with DEX at day 0	The data were analyzed with GeneSpring GX 11 using RMA algorhitm as analysis and normalization method.	Name: Zeljka Smit-McBride; Email: zsmcbride@ucdavis.edu; Laboratory: Vitreoretinal Research Lab; Department: Ophthalmology; Institute: UC Davis; Address: One Shields Ave, Tupper Hall #2403; City: Davis; State: CA; Zip/postal_code: 95616; Country: USA	ftp://ftp.ncbi.nlm.nih.gov/geo/samples/GSM1208nnn/GSM1208416/suppl/GSM1208416_Dex-019_RPE.CEL.gz	45101	1	not.included
213	1888537	RPE DEX day 30 bio rep3	GSM1208417	GSE49872	GPL1261	Public on Aug 01 2016	2013-08-14	2016-08-01	RNA	RPE DEX treatment day 30	Mus musculus	strain: C57BL6/J; gender: males; organ: eye; tissue: RPE/choroid; treatment: DEX; day: 30	total RNA	biotin	Animals were sacrificed within CO2 chamber, eyes were enucleated, disected, retinal tissue was removed and quicky immersed into 300ul RNALater. Samples were stored in RNALater at -20C till the total RNA isolation step.	Total RNA was isolated using Qiagen RNeasy kit according to the manufacturer's instructions.	Biotinylated cRNA were prepared according to the two-cycle Affymetrix protocol from 0.100 ug total RNA (Expression Analysis Technical Manual, 2001, Affymetrix).	NA	NA	NA	NA	NA	NA	NA	NA	Following fragmentation, 10 ug of cRNA were hybridized for 16 hr at 45C on GeneChip Mouse 430 2.0 Genome Array. GeneChips were washed and stained in the Affymetrix Fluidics Station 450.	Gene expression data at day 30 from the eyes intravitreally injected with DEX at day 0	The data were analyzed with GeneSpring GX 11 using RMA algorhitm as analysis and normalization method.	Name: Zeljka Smit-McBride; Email: zsmcbride@ucdavis.edu; Laboratory: Vitreoretinal Research Lab; Department: Ophthalmology; Institute: UC Davis; Address: One Shields Ave, Tupper Hall #2403; City: Davis; State: CA; Zip/postal_code: 95616; Country: USA	ftp://ftp.ncbi.nlm.nih.gov/geo/samples/GSM1208nnn/GSM1208417/suppl/GSM1208417_Dex-020_RPE.CEL.gz	45101	1	not.included
214	1888538	RPE TAA day 30 bio rep1	GSM1208418	GSE49872	GPL1261	Public on Aug 01 2016	2013-08-14	2016-08-01	RNA	RPE TAA treatment day 30	Mus musculus	strain: C57BL6/J; gender: males; organ: eye; tissue: RPE/choroid; treatment: TAA; day: 30	total RNA	biotin	Animals were sacrificed within CO2 chamber, eyes were enucleated, disected, retinal tissue was removed and quicky immersed into 300ul RNALater. Samples were stored in RNALater at -20C till the total RNA isolation step.	Total RNA was isolated using Qiagen RNeasy kit according to the manufacturer's instructions.	Biotinylated cRNA were prepared according to the two-cycle Affymetrix protocol from 0.100 ug total RNA (Expression Analysis Technical Manual, 2001, Affymetrix).	NA	NA	NA	NA	NA	NA	NA	NA	Following fragmentation, 10 ug of cRNA were hybridized for 16 hr at 45C on GeneChip Mouse 430 2.0 Genome Array. GeneChips were washed and stained in the Affymetrix Fluidics Station 450.	Gene expression data at day 30 from the eyes intravitreally injected with TAA at day 0	The data were analyzed with GeneSpring GX 11 using RMA algorhitm as analysis and normalization method.	Name: Zeljka Smit-McBride; Email: zsmcbride@ucdavis.edu; Laboratory: Vitreoretinal Research Lab; Department: Ophthalmology; Institute: UC Davis; Address: One Shields Ave, Tupper Hall #2403; City: Davis; State: CA; Zip/postal_code: 95616; Country: USA	ftp://ftp.ncbi.nlm.nih.gov/geo/samples/GSM1208nnn/GSM1208418/suppl/GSM1208418_TAA-021_RPE.CEL.gz	45101	1	not.included
215	1888539	RPE TAA day 30 bio rep2	GSM1208419	GSE49872	GPL1261	Public on Aug 01 2016	2013-08-14	2016-08-01	RNA	RPE TAA treatment day 30	Mus musculus	strain: C57BL6/J; gender: males; organ: eye; tissue: RPE/choroid; treatment: TAA; day: 30	total RNA	biotin	Animals were sacrificed within CO2 chamber, eyes were enucleated, disected, retinal tissue was removed and quicky immersed into 300ul RNALater. Samples were stored in RNALater at -20C till the total RNA isolation step.	Total RNA was isolated using Qiagen RNeasy kit according to the manufacturer's instructions.	Biotinylated cRNA were prepared according to the two-cycle Affymetrix protocol from 0.100 ug total RNA (Expression Analysis Technical Manual, 2001, Affymetrix).	NA	NA	NA	NA	NA	NA	NA	NA	Following fragmentation, 10 ug of cRNA were hybridized for 16 hr at 45C on GeneChip Mouse 430 2.0 Genome Array. GeneChips were washed and stained in the Affymetrix Fluidics Station 450.	Gene expression data at day 30 from the eyes intravitreally injected with TAA at day 0	The data were analyzed with GeneSpring GX 11 using RMA algorhitm as analysis and normalization method.	Name: Zeljka Smit-McBride; Email: zsmcbride@ucdavis.edu; Laboratory: Vitreoretinal Research Lab; Department: Ophthalmology; Institute: UC Davis; Address: One Shields Ave, Tupper Hall #2403; City: Davis; State: CA; Zip/postal_code: 95616; Country: USA	ftp://ftp.ncbi.nlm.nih.gov/geo/samples/GSM1208nnn/GSM1208419/suppl/GSM1208419_TAA-022_RPE.CEL.gz	45101	1	not.included
216	1888540	RPE TAA day 30 bio rep3	GSM1208420	GSE49872	GPL1261	Public on Aug 01 2016	2013-08-14	2016-08-01	RNA	RPE TAA treatment day 30	Mus musculus	strain: C57BL6/J; gender: males; organ: eye; tissue: RPE/choroid; treatment: TAA; day: 30	total RNA	biotin	Animals were sacrificed within CO2 chamber, eyes were enucleated, disected, retinal tissue was removed and quicky immersed into 300ul RNALater. Samples were stored in RNALater at -20C till the total RNA isolation step.	Total RNA was isolated using Qiagen RNeasy kit according to the manufacturer's instructions.	Biotinylated cRNA were prepared according to the two-cycle Affymetrix protocol from 0.100 ug total RNA (Expression Analysis Technical Manual, 2001, Affymetrix).	NA	NA	NA	NA	NA	NA	NA	NA	Following fragmentation, 10 ug of cRNA were hybridized for 16 hr at 45C on GeneChip Mouse 430 2.0 Genome Array. GeneChips were washed and stained in the Affymetrix Fluidics Station 450.	Gene expression data at day 30 from the eyes intravitreally injected with TAA at day 0	The data were analyzed with GeneSpring GX 11 using RMA algorhitm as analysis and normalization method.	Name: Zeljka Smit-McBride; Email: zsmcbride@ucdavis.edu; Laboratory: Vitreoretinal Research Lab; Department: Ophthalmology; Institute: UC Davis; Address: One Shields Ave, Tupper Hall #2403; City: Davis; State: CA; Zip/postal_code: 95616; Country: USA	ftp://ftp.ncbi.nlm.nih.gov/geo/samples/GSM1208nnn/GSM1208420/suppl/GSM1208420_TAA-024_RPE.CEL.gz	45101	1	not.included

## Sheet: gsmFull
	ID	title	gsm	series_id	gpl	status	submission_date	last_update_date	type	source_name_ch1	organism_ch1	characteristics_ch1	molecule_ch1	label_ch1	treatment_protocol_ch1	extract_protocol_ch1	label_protocol_ch1	source_name_ch2	organism_ch2	characteristics_ch2	molecule_ch2	label_ch2	treatment_protocol_ch2	extract_protocol_ch2	label_protocol_ch2	hyb_protocol	description	data_processing	contact	supplementary_file	data_row_count	channel_count	category	age.days
4	69507	retina_DBA_1024L_3mo_rep1	GSM81691	GSE3554	GPL1261	Public on Nov 04 2005	2005-11-03	2005-11-03	RNA	Animal id 1024, left retina, 3 months, female, DBA/2J	Mus musculus	Age: 3 months, Sex: Female, Retina: left, Final IOP (mm Hg): 19.1, Strain:DBA/2J	total RNA	biotin	NA	Whole retinas were removed from 3, and 8 month old DBA/2J mice and rinsed in ice-cold 0.1 M phosphate buffered saline to remove blood. Three individual retinas at each age were homogenized in Qiagen RLT buffer using a micro pestle and pulled five times through a 22G needle, then flash frozen in liquid nitrogen.	Total RNA was isolated using a Qiagen RNeasy Kit. The quantity and quality of the RNA was assessed using a Nanodrop ND1000 spectrophotometer and an Agilent 2100 Bioanalyzer. 20ng of each retinal RNA sample was amplified, fractionated, and labeled with a NuGEN Ovation Biotin kit to generate probe for Affymetrix microarray analysis.	NA	NA	NA	NA	NA	NA	NA	NA	standard Affymetrix procedures	Three month old female DBA/2J mouse retina	All preprocessing of Affymetrix data was performed using the Bioconductor Package in the R statistical environment. Data set analysis done under the R statistical environment version 1.9.0 on i686-pc-linux-gnu. Bioconductor package 'affy' version 1.4.32, 'gcrma' version 1.1.0, 'siggenes'(R sam analysis) version 1.0.6.	Name: Monica,L.,Vetter; Email: monica@neuro.utah.edu; Phone: (801) 581-4984; Fax: (801) 581-4233; Laboratory: Vetter Lab; Department: Neurobiology & Anatomy; Institute: University of Utah; Address: 20 North, 1900 East Rm. 517 Wintrobe; City: Salt Lake City ; State: UT; Zip/postal_code: 84132-3401; Country: USA	ftp://ftp.ncbi.nlm.nih.gov/geo/samples/GSM81nnn/GSM81691/suppl/GSM81691.CEL.gz	45101	1	whole.retina	90
5	69508	retina_DBA_1025L_3mo_rep2	GSM81692	GSE3554	GPL1261	Public on Nov 04 2005	2005-11-03	2005-11-03	RNA	Animal id 1025, left retina, 3 months, female, DBA/2J	Mus musculus	Age: 3 months, Sex: Female, Retina: left, Final IOP (mm Hg): 15.3, Strain:DBA/2J	total RNA	biotin	NA	Whole retinas were removed from 3, and 8 month old DBA/2J mice and rinsed in ice-cold 0.1 M phosphate buffered saline to remove blood. Three individual retinas at each age were homogenized in Qiagen RLT buffer using a micro pestle and pulled five times through a 22G needle, then flash frozen in liquid nitrogen.	Total RNA was isolated using a Qiagen RNeasy Kit. The quantity and quality of the RNA was assessed using a Nanodrop ND1000 spectrophotometer and an Agilent 2100 Bioanalyzer. 20ng of each retinal RNA sample was amplified, fractionated, and labeled with a NuGEN Ovation Biotin kit to generate probe for Affymetrix microarray analysis.	NA	NA	NA	NA	NA	NA	NA	NA	standard Affymetrix procedures	Three month old female DBA/2J mouse retina	All preprocessing of Affymetrix data was performed using the Bioconductor Package in the R statistical environment. Data set analysis done under the R statistical environment version 1.9.0 on i686-pc-linux-gnu. Bioconductor package 'affy' version 1.4.32, 'gcrma' version 1.1.0, 'siggenes'(R sam analysis) version 1.0.6.	Name: Monica,L.,Vetter; Email: monica@neuro.utah.edu; Phone: (801) 581-4984; Fax: (801) 581-4233; Laboratory: Vetter Lab; Department: Neurobiology & Anatomy; Institute: University of Utah; Address: 20 North, 1900 East Rm. 517 Wintrobe; City: Salt Lake City ; State: UT; Zip/postal_code: 84132-3401; Country: USA	ftp://ftp.ncbi.nlm.nih.gov/geo/samples/GSM81nnn/GSM81692/suppl/GSM81692.CEL.gz	45101	1	whole.retina	90
6	69509	retina_DBA_1026L_3mo_rep3	GSM81693	GSE3554	GPL1261	Public on Nov 04 2005	2005-11-03	2005-11-03	RNA	Animal id 1026, left retina, 3 months, female, DBA/2J	Mus musculus	Age: 3 months, Sex: Female, Retina: left, Final IOP (mm Hg): 18.2, Strain:DBA/2J	total RNA	biotin	NA	Whole retinas were removed from 3, and 8 month old DBA/2J mice and rinsed in ice-cold 0.1 M phosphate buffered saline to remove blood. Three individual retinas at each age were homogenized in Qiagen RLT buffer using a micro pestle and pulled five times through a 22G needle, then flash frozen in liquid nitrogen.	Total RNA was isolated using a Qiagen RNeasy Kit. The quantity and quality of the RNA was assessed using a Nanodrop ND1000 spectrophotometer and an Agilent 2100 Bioanalyzer. 20ng of each retinal RNA sample was amplified, fractionated, and labeled with a NuGEN Ovation Biotin kit to generate probe for Affymetrix microarray analysis.	NA	NA	NA	NA	NA	NA	NA	NA	standard Affymetrix procedures	Three month old female DBA/2J mouse retina	All preprocessing of Affymetrix data was performed using the Bioconductor Package in the R statistical environment. Data set analysis done under the R statistical environment version 1.9.0 on i686-pc-linux-gnu. Bioconductor package 'affy' version 1.4.32, 'gcrma' version 1.1.0, 'siggenes'(R sam analysis) version 1.0.6.	Name: Monica,L.,Vetter; Email: monica@neuro.utah.edu; Phone: (801) 581-4984; Fax: (801) 581-4233; Laboratory: Vetter Lab; Department: Neurobiology & Anatomy; Institute: University of Utah; Address: 20 North, 1900 East Rm. 517 Wintrobe; City: Salt Lake City ; State: UT; Zip/postal_code: 84132-3401; Country: USA	ftp://ftp.ncbi.nlm.nih.gov/geo/samples/GSM81nnn/GSM81693/suppl/GSM81693.CEL.gz	45101	1	whole.retina	90
22	80139	wt-Gfp 4 weeks replicate 1	GSM92629	GSE4051	GPL1261	Public on Feb 28 2006	2006-01-16	2006-01-18	RNA	Gfp+ photoreceptor cells	Mus musculus	wt-Gfp, Gfp+ photoreceptor cells	total RNA	Biotin	NA	mRNA was amplified using Nugene kit	Nugene kit protocol	NA	NA	NA	NA	NA	NA	NA	NA	Affymetrix standard	Nrl-ko mice were mated with wt-Gfp mice in which Gfp expression is driven by Nrl promoter. Gfp+ photoreceptors were purified by FACS and RNA was extracted and amplified by Nugene kit.; This is wt-Gfp 4 weeks replicate 1.	RMA	Name: Swaroop Anand; Email: swaroop@umich.edu; Phone: 734-615 2246; Department: Ophthalmology & Visual Sciences; Institute: University of Michigan; Address: 1000 Wall St.; City: Ann Arbor; State: MI; Zip/postal_code: 48105; Country: USA; Web_link: http://www.umich.edu/~retina	ftp://ftp.ncbi.nlm.nih.gov/geo/samples/GSM92nnn/GSM92629/suppl/GSM92629.CEL.gz	45101	1	photoreceptors	30		7.5
23	80140	wt-Gfp 4 weeks replicate 2	GSM92630	GSE4051	GPL1261	Public on Feb 28 2006	2006-01-16	2006-01-18	RNA	Gfp+ photoreceptor cells	Mus musculus	wt-Gfp, Gfp+ photoreceptor cells	total RNA	Biotin	NA	mRNA was amplified using Nugene kit	Nugene kit protocol	NA	NA	NA	NA	NA	NA	NA	NA	Affymetrix standard	Nrl-ko mice were mated with wt-Gfp mice in which Gfp expression is driven by Nrl promoter. Gfp+ photoreceptors were purified by FACS and RNA was extracted and amplified by Nugene kit.; This is wt-Gfp 4 weeks replicate 2.	RMA	Name: Swaroop Anand; Email: swaroop@umich.edu; Phone: 734-615 2246; Department: Ophthalmology & Visual Sciences; Institute: University of Michigan; Address: 1000 Wall St.; City: Ann Arbor; State: MI; Zip/postal_code: 48105; Country: USA; Web_link: http://www.umich.edu/~retina	ftp://ftp.ncbi.nlm.nih.gov/geo/samples/GSM92nnn/GSM92630/suppl/GSM92630.CEL.gz	45101	1	photoreceptors	30
24	80141	wt-Gfp 4 weeks replicate 3	GSM92631	GSE4051	GPL1261	Public on Feb 28 2006	2006-01-16	2006-01-18	RNA	Gfp+ photoreceptor cells	Mus musculus	wt-Gfp, Gfp+ photoreceptor cells	total RNA	Biotin	NA	mRNA was amplified using Nugene kit	Nugene kit protocol	NA	NA	NA	NA	NA	NA	NA	NA	Affymetrix standard	Nrl-ko mice were mated with wt-Gfp mice in which Gfp expression is driven by Nrl promoter. Gfp+ photoreceptors were purified by FACS and RNA was extracted and amplified by Nugene kit.; This is wt-Gfp 4 weeks replicate 3.	RMA	Name: Swaroop Anand; Email: swaroop@umich.edu; Phone: 734-615 2246; Department: Ophthalmology & Visual Sciences; Institute: University of Michigan; Address: 1000 Wall St.; City: Ann Arbor; State: MI; Zip/postal_code: 48105; Country: USA; Web_link: http://www.umich.edu/~retina	ftp://ftp.ncbi.nlm.nih.gov/geo/samples/GSM92nnn/GSM92631/suppl/GSM92631.CEL.gz	45101	1	photoreceptors	30
25	80142	wt-Gfp 4 weeks replicate 4	GSM92632	GSE4051	GPL1261	Public on Feb 28 2006	2006-01-16	2006-01-18	RNA	Gfp+ photoreceptor cells	Mus musculus	wt-Gfp, Gfp+ photoreceptor cells	total RNA	Biotin	NA	mRNA was amplified using Nugene kit	Nugene kit protocol	NA	NA	NA	NA	NA	NA	NA	NA	Affymetrix standard	Nrl-ko mice were mated with wt-Gfp mice in which Gfp expression is driven by Nrl promoter. Gfp+ photoreceptors were purified by FACS and RNA was extracted and amplified by Nugene kit.; This is wt-Gfp 4 weeks replicate 4.	RMA	Name: Swaroop Anand; Email: swaroop@umich.edu; Phone: 734-615 2246; Department: Ophthalmology & Visual Sciences; Institute: University of Michigan; Address: 1000 Wall St.; City: Ann Arbor; State: MI; Zip/postal_code: 48105; Country: USA; Web_link: http://www.umich.edu/~retina	ftp://ftp.ncbi.nlm.nih.gov/geo/samples/GSM92nnn/GSM92632/suppl/GSM92632.CEL.gz	45101	1	photoreceptors	30
30	80147	wt-Gfp P10 replicate 1	GSM92637	GSE4051	GPL1261	Public on Feb 28 2006	2006-01-16	2006-01-18	RNA	Gfp+ photoreceptor cells	Mus musculus	wt-Gfp, Gfp+ photoreceptor cells	total RNA	Biotin	NA	mRNA was amplified using Nugene kit	Nugene kit protocol	NA	NA	NA	NA	NA	NA	NA	NA	Affymetrix standard	Nrl-ko mice were mated with wt-Gfp mice in which Gfp expression is driven by Nrl promoter. Gfp+ photoreceptors were purified by FACS and RNA was extracted and amplified by Nugene kit.; This is wt-Gfp P10 replicate 1.	RMA	Name: Swaroop Anand; Email: swaroop@umich.edu; Phone: 734-615 2246; Department: Ophthalmology & Visual Sciences; Institute: University of Michigan; Address: 1000 Wall St.; City: Ann Arbor; State: MI; Zip/postal_code: 48105; Country: USA; Web_link: http://www.umich.edu/~retina	ftp://ftp.ncbi.nlm.nih.gov/geo/samples/GSM92nnn/GSM92637/suppl/GSM92637.CEL.gz	45101	1	photoreceptors	10
31	80148	wt-Gfp P10 replicate 2	GSM92638	GSE4051	GPL1261	Public on Feb 28 2006	2006-01-16	2006-01-18	RNA	Gfp+ photoreceptor cells	Mus musculus	wt-Gfp, Gfp+ photoreceptor cells	total RNA	Biotin	NA	mRNA was amplified using Nugene kit	Nugene kit protocol	NA	NA	NA	NA	NA	NA	NA	NA	Affymetrix standard	Nrl-ko mice were mated with wt-Gfp mice in which Gfp expression is driven by Nrl promoter. Gfp+ photoreceptors were purified by FACS and RNA was extracted and amplified by Nugene kit.; This is wt-Gfp P10 replicate 2.	RMA	Name: Swaroop Anand; Email: swaroop@umich.edu; Phone: 734-615 2246; Department: Ophthalmology & Visual Sciences; Institute: University of Michigan; Address: 1000 Wall St.; City: Ann Arbor; State: MI; Zip/postal_code: 48105; Country: USA; Web_link: http://www.umich.edu/~retina	ftp://ftp.ncbi.nlm.nih.gov/geo/samples/GSM92nnn/GSM92638/suppl/GSM92638.CEL.gz	45101	1	photoreceptors	10
32	80149	wt-Gfp P10 replicate 3	GSM92639	GSE4051	GPL1261	Public on Feb 28 2006	2006-01-16	2006-01-18	RNA	Gfp+ photoreceptor cells	Mus musculus	wt-Gfp, Gfp+ photoreceptor cells	total RNA	Biotin	NA	mRNA was amplified using Nugene kit	Nugene kit protocol	NA	NA	NA	NA	NA	NA	NA	NA	Affymetrix standard	Nrl-ko mice were mated with wt-Gfp mice in which Gfp expression is driven by Nrl promoter. Gfp+ photoreceptors were purified by FACS and RNA was extracted and amplified by Nugene kit.; This is wt-Gfp P10 replicate 3.	RMA	Name: Swaroop Anand; Email: swaroop@umich.edu; Phone: 734-615 2246; Department: Ophthalmology & Visual Sciences; Institute: University of Michigan; Address: 1000 Wall St.; City: Ann Arbor; State: MI; Zip/postal_code: 48105; Country: USA; Web_link: http://www.umich.edu/~retina	ftp://ftp.ncbi.nlm.nih.gov/geo/samples/GSM92nnn/GSM92639/suppl/GSM92639.CEL.gz	45101	1	photoreceptors	10
33	80150	wt-Gfp P10 replicate 4	GSM92640	GSE4051	GPL1261	Public on Feb 28 2006	2006-01-16	2006-01-18	RNA	Gfp+ photoreceptor cells	Mus musculus	wt-Gfp, Gfp+ photoreceptor cells	total RNA	Biotin	NA	mRNA was amplified using Nugene kit	Nugene kit protocol	NA	NA	NA	NA	NA	NA	NA	NA	Affymetrix standard	Nrl-ko mice were mated with wt-Gfp mice in which Gfp expression is driven by Nrl promoter. Gfp+ photoreceptors were purified by FACS and RNA was extracted and amplified by Nugene kit.; This is wt-Gfp P10 replicate 4.	RMA	Name: Swaroop Anand; Email: swaroop@umich.edu; Phone: 734-615 2246; Department: Ophthalmology & Visual Sciences; Institute: University of Michigan; Address: 1000 Wall St.; City: Ann Arbor; State: MI; Zip/postal_code: 48105; Country: USA; Web_link: http://www.umich.edu/~retina	ftp://ftp.ncbi.nlm.nih.gov/geo/samples/GSM92nnn/GSM92640/suppl/GSM92640.CEL.gz	45101	1	photoreceptors	10
34	80151	wt-Gfp P2 replicate 1	GSM92641	GSE4051	GPL1261	Public on Feb 28 2006	2006-01-16	2006-01-18	RNA	Gfp+ photoreceptor cells	Mus musculus	wt-Gfp, Gfp+ photoreceptor cells	total RNA	Biotin	NA	mRNA was amplified using Nugene kit	Nugene kit protocol	NA	NA	NA	NA	NA	NA	NA	NA	Affymetrix standard	Nrl-ko mice were mated with wt-Gfp mice in which Gfp expression is driven by Nrl promoter. Gfp+ photoreceptors were purified by FACS and RNA was extracted and amplified by Nugene kit.; This is wt-Gfp P2 replicate 1.	RMA	Name: Swaroop Anand; Email: swaroop@umich.edu; Phone: 734-615 2246; Department: Ophthalmology & Visual Sciences; Institute: University of Michigan; Address: 1000 Wall St.; City: Ann Arbor; State: MI; Zip/postal_code: 48105; Country: USA; Web_link: http://www.umich.edu/~retina	ftp://ftp.ncbi.nlm.nih.gov/geo/samples/GSM92nnn/GSM92641/suppl/GSM92641.CEL.gz	45101	1	photoreceptors	2
35	80152	wt-Gfp P2 replicate 2	GSM92642	GSE4051	GPL1261	Public on Feb 28 2006	2006-01-16	2006-01-18	RNA	Gfp+ photoreceptor cells	Mus musculus	wt-Gfp, Gfp+ photoreceptor cells	total RNA	Biotin	NA	mRNA was amplified using Nugene kit	Nugene kit protocol	NA	NA	NA	NA	NA	NA	NA	NA	Affymetrix standard	Nrl-ko mice were mated with wt-Gfp mice in which Gfp expression is driven by Nrl promoter. Gfp+ photoreceptors were purified by FACS and RNA was extracted and amplified by Nugene kit.; This is wt-Gfp P2 replicate 2.	RMA	Name: Swaroop Anand; Email: swaroop@umich.edu; Phone: 734-615 2246; Department: Ophthalmology & Visual Sciences; Institute: University of Michigan; Address: 1000 Wall St.; City: Ann Arbor; State: MI; Zip/postal_code: 48105; Country: USA; Web_link: http://www.umich.edu/~retina	ftp://ftp.ncbi.nlm.nih.gov/geo/samples/GSM92nnn/GSM92642/suppl/GSM92642.CEL.gz	45101	1	photoreceptors	2
36	80153	wt-Gfp P2 replicate 3	GSM92643	GSE4051	GPL1261	Public on Feb 28 2006	2006-01-16	2006-01-18	RNA	Gfp+ photoreceptor cells	Mus musculus	wt-Gfp, Gfp+ photoreceptor cells	total RNA	Biotin	NA	mRNA was amplified using Nugene kit	Nugene kit protocol	NA	NA	NA	NA	NA	NA	NA	NA	Affymetrix standard	Nrl-ko mice were mated with wt-Gfp mice in which Gfp expression is driven by Nrl promoter. Gfp+ photoreceptors were purified by FACS and RNA was extracted and amplified by Nugene kit.; This is wt-Gfp P2 replicate 3.	RMA	Name: Swaroop Anand; Email: swaroop@umich.edu; Phone: 734-615 2246; Department: Ophthalmology & Visual Sciences; Institute: University of Michigan; Address: 1000 Wall St.; City: Ann Arbor; State: MI; Zip/postal_code: 48105; Country: USA; Web_link: http://www.umich.edu/~retina	ftp://ftp.ncbi.nlm.nih.gov/geo/samples/GSM92nnn/GSM92643/suppl/GSM92643.CEL.gz	45101	1	photoreceptors	2
37	80154	wt-Gfp P2 replicate 4	GSM92644	GSE4051	GPL1261	Public on Feb 28 2006	2006-01-16	2008-09-10	RNA	Gfp+ photoreceptor cells	Mus musculus	wt-Gfp, Gfp+ photoreceptor cells	total RNA	Biotin	NA	mRNA was amplified using Nugene kit	Nugene kit protocol	NA	NA	NA	NA	NA	NA	NA	NA	Affymetrix standard	Nrl-ko mice were mated with wt-Gfp mice in which Gfp expression is driven by Nrl promoter. Gfp+ photoreceptors were purified by FACS and RNA was extracted and amplified by Nugene kit.; This is wt-Gfp P2 replicate 4.	RMA	Name: Swaroop Anand; Email: swaroop@umich.edu; Phone: 734-615 2246; Department: Ophthalmology & Visual Sciences; Institute: University of Michigan; Address: 1000 Wall St.; City: Ann Arbor; State: MI; Zip/postal_code: 48105; Country: USA; Web_link: http://www.umich.edu/~retina	ftp://ftp.ncbi.nlm.nih.gov/geo/samples/GSM92nnn/GSM92644/suppl/GSM92644.CEL.gz	45101	1	photoreceptors	2
38	80155	wt-Gfp P6 replicate 1	GSM92645	GSE4051	GPL1261	Public on Feb 28 2006	2006-01-16	2006-01-18	RNA	Gfp+ photoreceptor cells	Mus musculus	wt-Gfp, Gfp+ photoreceptor cells	total RNA	Biotin	NA	mRNA was amplified using Nugene kit	Nugene kit protocol	NA	NA	NA	NA	NA	NA	NA	NA	Affymetrix standard	Nrl-ko mice were mated with wt-Gfp mice in which Gfp expression is driven by Nrl promoter. Gfp+ photoreceptors were purified by FACS and RNA was extracted and amplified by Nugene kit.; This is wt-Gfp P6 replicate 1.	RMA	Name: Swaroop Anand; Email: swaroop@umich.edu; Phone: 734-615 2246; Department: Ophthalmology & Visual Sciences; Institute: University of Michigan; Address: 1000 Wall St.; City: Ann Arbor; State: MI; Zip/postal_code: 48105; Country: USA; Web_link: http://www.umich.edu/~retina	ftp://ftp.ncbi.nlm.nih.gov/geo/samples/GSM92nnn/GSM92645/suppl/GSM92645.CEL.gz	45101	1	photoreceptors	6
39	80156	wt-Gfp P6 replicate 2	GSM92646	GSE4051	GPL1261	Public on Feb 28 2006	2006-01-16	2006-01-18	RNA	Gfp+ photoreceptor cells	Mus musculus	wt-Gfp, Gfp+ photoreceptor cells	total RNA	Biotin	NA	mRNA was amplified using Nugene kit	Nugene kit protocol	NA	NA	NA	NA	NA	NA	NA	NA	Affymetrix standard	Nrl-ko mice were mated with wt-Gfp mice in which Gfp expression is driven by Nrl promoter. Gfp+ photoreceptors were purified by FACS and RNA was extracted and amplified by Nugene kit.; This is wt-Gfp P6 replicate 2.	RMA	Name: Swaroop Anand; Email: swaroop@umich.edu; Phone: 734-615 2246; Department: Ophthalmology & Visual Sciences; Institute: University of Michigan; Address: 1000 Wall St.; City: Ann Arbor; State: MI; Zip/postal_code: 48105; Country: USA; Web_link: http://www.umich.edu/~retina	ftp://ftp.ncbi.nlm.nih.gov/geo/samples/GSM92nnn/GSM92646/suppl/GSM92646.CEL.gz	45101	1	photoreceptors	6
40	80157	wt-Gfp P6 replicate 3	GSM92647	GSE4051	GPL1261	Public on Feb 28 2006	2006-01-16	2006-01-18	RNA	Gfp+ photoreceptor cells	Mus musculus	wt-Gfp, Gfp+ photoreceptor cells	total RNA	Biotin	NA	mRNA was amplified using Nugene kit	Nugene kit protocol	NA	NA	NA	NA	NA	NA	NA	NA	Affymetrix standard	Nrl-ko mice were mated with wt-Gfp mice in which Gfp expression is driven by Nrl promoter. Gfp+ photoreceptors were purified by FACS and RNA was extracted and amplified by Nugene kit.; This is wt-Gfp P6 replicate 3.	RMA	Name: Swaroop Anand; Email: swaroop@umich.edu; Phone: 734-615 2246; Department: Ophthalmology & Visual Sciences; Institute: University of Michigan; Address: 1000 Wall St.; City: Ann Arbor; State: MI; Zip/postal_code: 48105; Country: USA; Web_link: http://www.umich.edu/~retina	ftp://ftp.ncbi.nlm.nih.gov/geo/samples/GSM92nnn/GSM92647/suppl/GSM92647.CEL.gz	45101	1	photoreceptors	6
41	80158	wt-Gfp P6 replicate 4	GSM92648	GSE4051	GPL1261	Public on Feb 28 2006	2006-01-16	2006-01-18	RNA	Gfp+ photoreceptor cells	Mus musculus	wt-Gfp, Gfp+ photoreceptor cells	total RNA	Biotin	NA	mRNA was amplified using Nugene kit	Nugene kit protocol	NA	NA	NA	NA	NA	NA	NA	NA	Affymetrix standard	Nrl-ko mice were mated with wt-Gfp mice in which Gfp expression is driven by Nrl promoter. Gfp+ photoreceptors were purified by FACS and RNA was extracted and amplified by Nugene kit.; This is wt-Gfp P6 replicate 4.	RMA	Name: Swaroop Anand; Email: swaroop@umich.edu; Phone: 734-615 2246; Department: Ophthalmology & Visual Sciences; Institute: University of Michigan; Address: 1000 Wall St.; City: Ann Arbor; State: MI; Zip/postal_code: 48105; Country: USA; Web_link: http://www.umich.edu/~retina	ftp://ftp.ncbi.nlm.nih.gov/geo/samples/GSM92nnn/GSM92648/suppl/GSM92648.CEL.gz	45101	1	photoreceptors	6
42	93151	eye, retina: Ret-C1-ENZO	GSM107514	GSE4756	GPL1261	Public on May 02 2006	2006-05-01	2013-05-22	RNA	eye, retina	Mus musculus	NA	total RNA	NA	NA	NA	NA	NA	NA	NA	NA	NA	NA	NA	NA	NA	RNA extracted from a fresh disected retina.; Treatment, type=timepoint, measurement=0.0 d	NA	Name: Winnie Liang; Institute: Translational Genomics; Address: 445 N. Fifth Street; City: Phoenix; State: AZ; Zip/postal_code: 85012; Country: USA	ftp://ftp.ncbi.nlm.nih.gov/geo/samples/GSM107nnn/GSM107514/suppl/GSM107514.cel.gz	45101	1	whole.retina	90
44	93153	eye, retina: Ret-C2-ENZO	GSM107516	GSE4756	GPL1261	Public on May 02 2006	2006-05-01	2013-05-22	RNA	eye, retina	Mus musculus	NA	total RNA	NA	NA	NA	NA	NA	NA	NA	NA	NA	NA	NA	NA	NA	RNA extracted from fresh retina; Treatment, type=timepoint, measurement=0.0 d	NA	Name: Winnie Liang; Institute: Translational Genomics; Address: 445 N. Fifth Street; City: Phoenix; State: AZ; Zip/postal_code: 85012; Country: USA	ftp://ftp.ncbi.nlm.nih.gov/geo/samples/GSM107nnn/GSM107516/suppl/GSM107516.cel.gz	45101	1	whole.retina	90
45	93154	eye, retina: Ret-C3-ENZO	GSM107517	GSE4756	GPL1261	Public on May 02 2006	2006-05-01	2013-05-22	RNA	eye, retina	Mus musculus	NA	total RNA	NA	NA	NA	NA	NA	NA	NA	NA	NA	NA	NA	NA	NA	RNA extracted from fresh retina; Treatment, type=timepoint, measurement=0.0 d	NA	Name: Winnie Liang; Institute: Translational Genomics; Address: 445 N. Fifth Street; City: Phoenix; State: AZ; Zip/postal_code: 85012; Country: USA	ftp://ftp.ncbi.nlm.nih.gov/geo/samples/GSM107nnn/GSM107517/suppl/GSM107517.cel.gz	45101	1	whole.retina	90
46	93155	eye, retina: Ret-C4-ENZO	GSM107518	GSE4756	GPL1261	Public on May 02 2006	2006-05-01	2013-05-22	RNA	eye, retina	Mus musculus	NA	total RNA	NA	NA	NA	NA	NA	NA	NA	NA	NA	NA	NA	NA	NA	RNA ectracted from a fresh retina; Treatment, type=timepoint, measurement=0.0 d	NA	Name: Winnie Liang; Institute: Translational Genomics; Address: 445 N. Fifth Street; City: Phoenix; State: AZ; Zip/postal_code: 85012; Country: USA	ftp://ftp.ncbi.nlm.nih.gov/geo/samples/GSM107nnn/GSM107518/suppl/GSM107518.cel.gz	45101	1	whole.retina	90
50	216924	Retinal pigment epithelium (RPE)	GSM239614	GSE9428	GPL1261	Public on Oct 24 2008	2007-10-25	2011-08-14	RNA	Primary cultured cells of retinal pigment epithelium	Mus musculus	Retinal pigment epithelium (Primary cultured cell)	total RNA	biotin	NA	Total RNA was isolated using TRIZOL Reagent(Invitrogen) and used as starting material for the cDNA preparation. RNA was purified from total cellular RNA by Nucleospin RNA II (Macherey-Nagel, Inc, Germany) as outlined by the manufacturer. Integrity of total RNA was assessed qualitatively on the Agilent 2100 Bioanalizer (Agilent Technologies).	1 micro gram of total RNA was reverse transcribed using the cDNA synthesis system of MessageAmp aRNA Kit (Ambion). The oligonucleotide used for priming was 5'-ggccagtgaattgtaatacgactcactatagggaggcgg-(t)24-3. Double-stranded cDNA was cleaned by phenol:chloroform extraction and the aqueous phase removed by centrifugation through Phase-lock Gel (Eppendorf). In vitro transcription was performed using…	NA	NA	NA	NA	NA	NA	NA	NA	10 migro grams of fragmented cRNA were hybridised (45 degrees Celsius, 16 hours). Hybridization was controled adding cRNA cocktail (BioC, BioD, Cre) mixed as described in previous versions of the Expression Analysis Technical Manual. Washing and staining was performed in a Fluidics Station 450 (Affymetrix) using the protocol EukGE-WS2v5.	Primary cultures of pigmented epithelial cells from retinal PE (RPE) cells were cultured in DMEM complete medium, composed of DMEM and 20% FBS for two weeks. The medium of ocular PE was changed to serum free medium, with a cellular RNA extraction then performed after an overnight culture. The RPE were also found to be 95% cytokeratin positive after 14 days of incubation.	The data analysis were performed using the Affymetrix GeneChip Operating Software v1.3. using Affymetrix default analysis settings and global scaling as normalization method. The trimmed mean target intensity of array was arbitrarily set to 100.	Name: Yuri Futagami; Department: Ophthalmology; Institute: Tokyo Medical and Dental University; Address: 1-5-45 Yushima Bunkyoku; City: Tokyo; Zip/postal_code: 113-8519; Country: Japan	ftp://ftp.ncbi.nlm.nih.gov/geo/samples/GSM239nnn/GSM239614/suppl/GSM239614.CEL.gz	45101	1	RPE	49
52	252519	RPE/choroid_young_rep1	GSM277616	GSE10965	GPL1261	Public on Mar 29 2008	2008-03-26	2008-03-28	RNA	young retinal pigmental epithelium/choroid	Mus musculus	Strain:C57BL/6, Gender: male, Age: 4 months, Tissue: retinal pigmental epithelium/choroid	total RNA	biotin	NA	Total RNA was extracted by using RNeasy Minikit from Qiagen.	standard Affymetrix labeling	NA	NA	NA	NA	NA	NA	NA	NA	standard Affymetrix hybridization	N/A	Based on the affymetrix .cel files, invariant set normalization was performed using dchip2006 and PM-only model was used for generating gene signal intensities.	Name: Huiyi Chen; Email: huiyi-chen@northwestern.edu; Department: Ophthalmology; Institute: Northwestern University School of Medicine ; Address: 303 E Chicago Ave, Tarry 13-752; City: Chicago; State: IL; Zip/postal_code: 60611; Country: USA	ftp://ftp.ncbi.nlm.nih.gov/geo/samples/GSM277nnn/GSM277616/suppl/GSM277616.CEL.gz; ftp://ftp.ncbi.nlm.nih.gov/geo/samples/GSM277nnn/GSM277616/suppl/GSM277616.CHP.gz	45101	1	RPE	90
53	252548	RPE/choroid_young_rep2	GSM277650	GSE10965	GPL1261	Public on Mar 29 2008	2008-03-27	2008-03-28	RNA	young retinal pigmental epithelium/choroid	Mus musculus	Strain:C57BL/6, Gender: male, Age: 4 months, Tissue: retinal pigmental epithelium/choroid	total RNA	biotin	NA	Total RNA was extracted by using RNeasy Minikit from Qiagen.	standard Affymetrix labeling	NA	NA	NA	NA	NA	NA	NA	NA	standard Affymetrix hybridization	N/A	Based on the affymetrix .cel files, invariant set normalization was performed using dchip2006 and PM-only model was used for generating gene signal intensities.	Name: Huiyi Chen; Email: huiyi-chen@northwestern.edu; Department: Ophthalmology; Institute: Northwestern University School of Medicine ; Address: 303 E Chicago Ave, Tarry 13-752; City: Chicago; State: IL; Zip/postal_code: 60611; Country: USA	ftp://ftp.ncbi.nlm.nih.gov/geo/samples/GSM277nnn/GSM277650/suppl/GSM277650.CEL.gz; ftp://ftp.ncbi.nlm.nih.gov/geo/samples/GSM277nnn/GSM277650/suppl/GSM277650.CHP.gz	45101	1	RPE	90
54	252549	RPE/choroid_young_rep3	GSM277651	GSE10965	GPL1261	Public on Mar 29 2008	2008-03-27	2008-03-28	RNA	young retinal pigmental epithelium/choroid	Mus musculus	Strain:C57BL/6, Gender: male, Age: 4 months, Tissue: retinal pigmental epithelium/choroid	total RNA	biotin	NA	Total RNA was extracted by using RNeasy Minikit from Qiagen.	standard Affymetrix labeling	NA	NA	NA	NA	NA	NA	NA	NA	standard Affymetrix hybridization	N/A	Based on the affymetrix .cel files, invariant set normalization was performed using dchip2006 and PM-only model was used for generating gene signal intensities.	Name: Huiyi Chen; Email: huiyi-chen@northwestern.edu; Department: Ophthalmology; Institute: Northwestern University School of Medicine ; Address: 303 E Chicago Ave, Tarry 13-752; City: Chicago; State: IL; Zip/postal_code: 60611; Country: USA	ftp://ftp.ncbi.nlm.nih.gov/geo/samples/GSM277nnn/GSM277651/suppl/GSM277651.CEL.gz; ftp://ftp.ncbi.nlm.nih.gov/geo/samples/GSM277nnn/GSM277651/suppl/GSM277651.CHP.gz	45101	1	RPE	90
55	252550	RPE/choroid_young_rep4	GSM277652	GSE10965	GPL1261	Public on Mar 29 2008	2008-03-27	2008-03-28	RNA	young retinal pigmental epithelium/choroid	Mus musculus	Strain:C57BL/6, Gender: male, Age: 4 months, Tissue: retinal pigmental epithelium/choroid	total RNA	biotin	NA	Total RNA was extracted by using RNeasy Minikit from Qiagen.	standard Affymetrix labeling	NA	NA	NA	NA	NA	NA	NA	NA	standard Affymetrix hybridization	N/A	Based on the affymetrix .cel files, invariant set normalization was performed using dchip2006 and PM-only model was used for generating gene signal intensities.	Name: Huiyi Chen; Email: huiyi-chen@northwestern.edu; Department: Ophthalmology; Institute: Northwestern University School of Medicine ; Address: 303 E Chicago Ave, Tarry 13-752; City: Chicago; State: IL; Zip/postal_code: 60611; Country: USA	ftp://ftp.ncbi.nlm.nih.gov/geo/samples/GSM277nnn/GSM277652/suppl/GSM277652.CEL.gz; ftp://ftp.ncbi.nlm.nih.gov/geo/samples/GSM277nnn/GSM277652/suppl/GSM277652.CHP.gz	45101	1	RPE	90
60	380918	P14 +/+ retina, biological rep1	GSM416868	GSE16585	GPL1261	Public on Oct 19 2009	2009-06-12	2009-10-19	RNA	P14 +/+ retina	Mus musculus	age: P14; tissue: retina; genotype: +/+	total RNA	biotin	NA	Each sample consists of 2 retina from one mouse and was snap frozen on dry ice. Total RNA was isolated with Trizol (Invitrogen).	5ug of total RNA was used as the starting material for GeneChip One-Cycle Target Labeling and Control Reagents (Affymetrix).	NA	NA	NA	NA	NA	NA	NA	NA	15ug of biotinylated-cRNA was hybridized to GeneChip Mouse Genome 430 2.0 arrays according to GeneChip Expression Analysis Techinical Manual (Affymetrix, P/N 701021 Rev. 5).	2 retina from one mouse	The Robust Multichip Average (RMA) method was used for background correction, quantile normalization, and summarization of expression scores.	Name: Douglas Forrest; Email: forrestd@niddk.nih.gov; Phone: 301-594-6170; Fax: 301-451-7848; Department: Clinical Endocrinology Branch; Institute: National Institute of Diabetes and Digestive and Kidney Diseases (NIDDK); Address: 10 Center Drive; City: Bethesda; State: MD; Zip/postal_code: 20892; Country: USA	ftp://ftp.ncbi.nlm.nih.gov/geo/samples/GSM416nnn/GSM416868/suppl/GSM416868.CEL.gz	45101	1	whole.retina	14
61	380919	P14 +/+ retina, biological rep2	GSM416869	GSE16585	GPL1261	Public on Oct 19 2009	2009-06-12	2009-10-19	RNA	P14 +/+ retina	Mus musculus	age: P14; tissue: retina; genotype: +/+	total RNA	biotin	NA	Each sample consists of 2 retina from one mouse and was snap frozen on dry ice. Total RNA was isolated with Trizol (Invitrogen).	5ug of total RNA was used as the starting material for GeneChip One-Cycle Target Labeling and Control Reagents (Affymetrix).	NA	NA	NA	NA	NA	NA	NA	NA	15ug of biotinylated-cRNA was hybridized to GeneChip Mouse Genome 430 2.0 arrays according to GeneChip Expression Analysis Techinical Manual (Affymetrix, P/N 701021 Rev. 5).	2 retina from one mouse	The Robust Multichip Average (RMA) method was used for background correction, quantile normalization, and summarization of expression scores.	Name: Douglas Forrest; Email: forrestd@niddk.nih.gov; Phone: 301-594-6170; Fax: 301-451-7848; Department: Clinical Endocrinology Branch; Institute: National Institute of Diabetes and Digestive and Kidney Diseases (NIDDK); Address: 10 Center Drive; City: Bethesda; State: MD; Zip/postal_code: 20892; Country: USA	ftp://ftp.ncbi.nlm.nih.gov/geo/samples/GSM416nnn/GSM416869/suppl/GSM416869.CEL.gz	45101	1	whole.retina	14
62	380920	P14 +/+ retina, biological rep3	GSM416870	GSE16585	GPL1261	Public on Oct 19 2009	2009-06-12	2009-10-19	RNA	P14 +/+ retina	Mus musculus	age: P14; tissue: retina; genotype: +/+	total RNA	biotin	NA	Each sample consists of 2 retina from one mouse and was snap frozen on dry ice. Total RNA was isolated with Trizol (Invitrogen).	5ug of total RNA was used as the starting material for GeneChip One-Cycle Target Labeling and Control Reagents (Affymetrix).	NA	NA	NA	NA	NA	NA	NA	NA	15ug of biotinylated-cRNA was hybridized to GeneChip Mouse Genome 430 2.0 arrays according to GeneChip Expression Analysis Techinical Manual (Affymetrix, P/N 701021 Rev. 5).	2 retina from one mouse	The Robust Multichip Average (RMA) method was used for background correction, quantile normalization, and summarization of expression scores.	Name: Douglas Forrest; Email: forrestd@niddk.nih.gov; Phone: 301-594-6170; Fax: 301-451-7848; Department: Clinical Endocrinology Branch; Institute: National Institute of Diabetes and Digestive and Kidney Diseases (NIDDK); Address: 10 Center Drive; City: Bethesda; State: MD; Zip/postal_code: 20892; Country: USA	ftp://ftp.ncbi.nlm.nih.gov/geo/samples/GSM416nnn/GSM416870/suppl/GSM416870.CEL.gz	45101	1	whole.retina	14
63	380921	P14 +/+ retina, biological rep4	GSM416871	GSE16585	GPL1261	Public on Oct 19 2009	2009-06-12	2009-10-19	RNA	P14 +/+ retina	Mus musculus	age: P14; tissue: retina; genotype: +/+	total RNA	biotin	NA	Each sample consists of 2 retina from one mouse and was snap frozen on dry ice. Total RNA was isolated with Trizol (Invitrogen).	5ug of total RNA was used as the starting material for GeneChip One-Cycle Target Labeling and Control Reagents (Affymetrix).	NA	NA	NA	NA	NA	NA	NA	NA	15ug of biotinylated-cRNA was hybridized to GeneChip Mouse Genome 430 2.0 arrays according to GeneChip Expression Analysis Techinical Manual (Affymetrix, P/N 701021 Rev. 5).	2 retina from one mouse	The Robust Multichip Average (RMA) method was used for background correction, quantile normalization, and summarization of expression scores.	Name: Douglas Forrest; Email: forrestd@niddk.nih.gov; Phone: 301-594-6170; Fax: 301-451-7848; Department: Clinical Endocrinology Branch; Institute: National Institute of Diabetes and Digestive and Kidney Diseases (NIDDK); Address: 10 Center Drive; City: Bethesda; State: MD; Zip/postal_code: 20892; Country: USA	ftp://ftp.ncbi.nlm.nih.gov/geo/samples/GSM416nnn/GSM416871/suppl/GSM416871.CEL.gz	45101	1	whole.retina	14
76	380934	P28 +/+ retina, biological rep1	GSM416884	GSE16585	GPL1261	Public on Oct 19 2009	2009-06-12	2009-10-19	RNA	P28 +/+ retina	Mus musculus	age: P28; tissue: retina; genotype: +/+	total RNA	biotin	NA	Each sample consists of 2 retina from one mouse and was snap frozen on dry ice. Total RNA was isolated with Trizol (Invitrogen).	5ug of total RNA was used as the starting material for GeneChip One-Cycle Target Labeling and Control Reagents (Affymetrix).	NA	NA	NA	NA	NA	NA	NA	NA	15ug of biotinylated-cRNA was hybridized to GeneChip Mouse Genome 430 2.0 arrays according to GeneChip Expression Analysis Techinical Manual (Affymetrix, P/N 701021 Rev. 5).	2 retina from one mouse	The Robust Multichip Average (RMA) method was used for background correction, quantile normalization, and summarization of expression scores.	Name: Douglas Forrest; Email: forrestd@niddk.nih.gov; Phone: 301-594-6170; Fax: 301-451-7848; Department: Clinical Endocrinology Branch; Institute: National Institute of Diabetes and Digestive and Kidney Diseases (NIDDK); Address: 10 Center Drive; City: Bethesda; State: MD; Zip/postal_code: 20892; Country: USA	ftp://ftp.ncbi.nlm.nih.gov/geo/samples/GSM416nnn/GSM416884/suppl/GSM416884.CEL.gz	45101	1	whole.retina	28
77	380935	P28 +/+ retina, biological rep2	GSM416885	GSE16585	GPL1261	Public on Oct 19 2009	2009-06-12	2009-10-19	RNA	P28 +/+ retina	Mus musculus	age: P28; tissue: retina; genotype: +/+	total RNA	biotin	NA	Each sample consists of 2 retina from one mouse and was snap frozen on dry ice. Total RNA was isolated with Trizol (Invitrogen).	5ug of total RNA was used as the starting material for GeneChip One-Cycle Target Labeling and Control Reagents (Affymetrix).	NA	NA	NA	NA	NA	NA	NA	NA	15ug of biotinylated-cRNA was hybridized to GeneChip Mouse Genome 430 2.0 arrays according to GeneChip Expression Analysis Techinical Manual (Affymetrix, P/N 701021 Rev. 5).	2 retina from one mouse	The Robust Multichip Average (RMA) method was used for background correction, quantile normalization, and summarization of expression scores.	Name: Douglas Forrest; Email: forrestd@niddk.nih.gov; Phone: 301-594-6170; Fax: 301-451-7848; Department: Clinical Endocrinology Branch; Institute: National Institute of Diabetes and Digestive and Kidney Diseases (NIDDK); Address: 10 Center Drive; City: Bethesda; State: MD; Zip/postal_code: 20892; Country: USA	ftp://ftp.ncbi.nlm.nih.gov/geo/samples/GSM416nnn/GSM416885/suppl/GSM416885.CEL.gz	45101	1	whole.retina	28
78	380936	P28 +/+ retina, biological rep3	GSM416886	GSE16585	GPL1261	Public on Oct 19 2009	2009-06-12	2009-10-19	RNA	P28 +/+ retina	Mus musculus	age: P28; tissue: retina; genotype: +/+	total RNA	biotin	NA	Each sample consists of 2 retina from one mouse and was snap frozen on dry ice. Total RNA was isolated with Trizol (Invitrogen).	5ug of total RNA was used as the starting material for GeneChip One-Cycle Target Labeling and Control Reagents (Affymetrix).	NA	NA	NA	NA	NA	NA	NA	NA	15ug of biotinylated-cRNA was hybridized to GeneChip Mouse Genome 430 2.0 arrays according to GeneChip Expression Analysis Techinical Manual (Affymetrix, P/N 701021 Rev. 5).	2 retina from one mouse	The Robust Multichip Average (RMA) method was used for background correction, quantile normalization, and summarization of expression scores.	Name: Douglas Forrest; Email: forrestd@niddk.nih.gov; Phone: 301-594-6170; Fax: 301-451-7848; Department: Clinical Endocrinology Branch; Institute: National Institute of Diabetes and Digestive and Kidney Diseases (NIDDK); Address: 10 Center Drive; City: Bethesda; State: MD; Zip/postal_code: 20892; Country: USA	ftp://ftp.ncbi.nlm.nih.gov/geo/samples/GSM416nnn/GSM416886/suppl/GSM416886.CEL.gz	45101	1	whole.retina	28
79	380937	P28 +/+ retina, biological rep4	GSM416887	GSE16585	GPL1261	Public on Oct 19 2009	2009-06-12	2009-10-19	RNA	P28 +/+ retina	Mus musculus	age: P28; tissue: retina; genotype: +/+	total RNA	biotin	NA	Each sample consists of 2 retina from one mouse and was snap frozen on dry ice. Total RNA was isolated with Trizol (Invitrogen).	5ug of total RNA was used as the starting material for GeneChip One-Cycle Target Labeling and Control Reagents (Affymetrix).	NA	NA	NA	NA	NA	NA	NA	NA	15ug of biotinylated-cRNA was hybridized to GeneChip Mouse Genome 430 2.0 arrays according to GeneChip Expression Analysis Techinical Manual (Affymetrix, P/N 701021 Rev. 5).	2 retina from one mouse	The Robust Multichip Average (RMA) method was used for background correction, quantile normalization, and summarization of expression scores.	Name: Douglas Forrest; Email: forrestd@niddk.nih.gov; Phone: 301-594-6170; Fax: 301-451-7848; Department: Clinical Endocrinology Branch; Institute: National Institute of Diabetes and Digestive and Kidney Diseases (NIDDK); Address: 10 Center Drive; City: Bethesda; State: MD; Zip/postal_code: 20892; Country: USA	ftp://ftp.ncbi.nlm.nih.gov/geo/samples/GSM416nnn/GSM416887/suppl/GSM416887.CEL.gz	45101	1	whole.retina	28
91	499837	P1-control-ex1	GSM544741	GSE21900	GPL1261	Public on May 18 2011	2010-05-19	2011-05-18	RNA	P1 retinas of control mice	Mus musculus	tissue: retina; genotype: otx2 flox/flox; Crx-Cre- (control); time: P1	total RNA	biotin	NA	The mouse retinas were dissected using forceps.; Total RNA (5 ug) of the retina was isolated using TRIzol reagent (Invitrogen) and converted to cDNA using One-Cycle cDNA synthesis kit (Affymetrix) according to the manufactureâ€™s instruction.	Biotin-labeled cRNA was prepared using IVT labeling kit.	NA	NA	NA	NA	NA	NA	NA	NA	cRNA was hybridized to GeneChip mouse genome 430 2.0 arrayin Hybridization Oven 640. GeneChips were washed and stained in the Affymetrix Fluidics Station 450	Gene expression data from the control retina at P1	Signal intensity was determined using GeneChip Operating Software 1.4.	Name: Takahisa Furukawa; Laboratory: Furukawa Lab; Department: Developmental Biology; Institute: Osaka Bioscience Institute; Address: 6-2-4 Furuedai; City: Suita; State: Osaka; Zip/postal_code: 565-0874; Country: Japan	ftp://ftp.ncbi.nlm.nih.gov/geo/samples/GSM544nnn/GSM544741/suppl/GSM544741_P1-ex1-WT.CEL.gz	45101	1	whole.retina	1
92	499838	P1-control-ex2	GSM544742	GSE21900	GPL1261	Public on May 18 2011	2010-05-19	2011-05-18	RNA	P1 retinas of control mice	Mus musculus	tissue: retina; genotype: otx2 flox/flox; Crx-Cre- (control); time: P1	total RNA	biotin	NA	The mouse retinas were dissected using forceps.; Total RNA (5 ug) of the retina was isolated using TRIzol reagent (Invitrogen) and converted to cDNA using One-Cycle cDNA synthesis kit (Affymetrix) according to the manufactureâ€™s instruction.	Biotin-labeled cRNA was prepared using IVT labeling kit.	NA	NA	NA	NA	NA	NA	NA	NA	cRNA was hybridized to GeneChip mouse genome 430 2.0 arrayin Hybridization Oven 640. GeneChips were washed and stained in the Affymetrix Fluidics Station 450	Gene expression data from the control retina at P1	Signal intensity was determined using GeneChip Operating Software 1.4.	Name: Takahisa Furukawa; Laboratory: Furukawa Lab; Department: Developmental Biology; Institute: Osaka Bioscience Institute; Address: 6-2-4 Furuedai; City: Suita; State: Osaka; Zip/postal_code: 565-0874; Country: Japan	ftp://ftp.ncbi.nlm.nih.gov/geo/samples/GSM544nnn/GSM544742/suppl/GSM544742_P1-ex2-WT.CEL.gz	45101	1	whole.retina	1
93	499839	P1-control-ex3	GSM544743	GSE21900	GPL1261	Public on May 18 2011	2010-05-19	2011-05-18	RNA	P1 retinas of control mice	Mus musculus	tissue: retina; genotype: otx2 flox/flox; Crx-Cre- (control); time: P1	total RNA	biotin	NA	The mouse retinas were dissected using forceps.; Total RNA (5 ug) of the retina was isolated using TRIzol reagent (Invitrogen) and converted to cDNA using One-Cycle cDNA synthesis kit (Affymetrix) according to the manufactureâ€™s instruction.	Biotin-labeled cRNA was prepared using IVT labeling kit.	NA	NA	NA	NA	NA	NA	NA	NA	cRNA was hybridized to GeneChip mouse genome 430 2.0 arrayin Hybridization Oven 640. GeneChips were washed and stained in the Affymetrix Fluidics Station 450	Gene expression data from the Otx2 CKO retina at P1	Signal intensity was determined using GeneChip Operating Software 1.4.	Name: Takahisa Furukawa; Laboratory: Furukawa Lab; Department: Developmental Biology; Institute: Osaka Bioscience Institute; Address: 6-2-4 Furuedai; City: Suita; State: Osaka; Zip/postal_code: 565-0874; Country: Japan	ftp://ftp.ncbi.nlm.nih.gov/geo/samples/GSM544nnn/GSM544743/suppl/GSM544743_P1-ex3-WT.CEL.gz	45101	1	whole.retina	1
97	499843	P12-control-ex1	GSM544747	GSE21900	GPL1261	Public on May 18 2011	2010-05-19	2011-05-18	RNA	P12 retinas of control mice	Mus musculus	tissue: retina; genotype: otx2 flox/flox; Crx-Cre- (control); time: P12	total RNA	biotin	NA	The mouse retinas were dissected using forceps.; Total RNA (5 ug) of the retina was isolated using TRIzol reagent (Invitrogen) and converted to cDNA using One-Cycle cDNA synthesis kit (Affymetrix) according to the manufactureâ€™s instruction.	Biotin-labeled cRNA was prepared using IVT labeling kit.	NA	NA	NA	NA	NA	NA	NA	NA	cRNA was hybridized to GeneChip mouse genome 430 2.0 arrayin Hybridization Oven 640. GeneChips were washed and stained in the Affymetrix Fluidics Station 450	Gene expression data from the control retina at P12	Signal intensity was determined using GeneChip Operating Software 1.4.	Name: Takahisa Furukawa; Laboratory: Furukawa Lab; Department: Developmental Biology; Institute: Osaka Bioscience Institute; Address: 6-2-4 Furuedai; City: Suita; State: Osaka; Zip/postal_code: 565-0874; Country: Japan	ftp://ftp.ncbi.nlm.nih.gov/geo/samples/GSM544nnn/GSM544747/suppl/GSM544747_P12_ex1_WT.CEL.gz	45101	1	whole.retina	12
98	499844	P12-control-ex2	GSM544748	GSE21900	GPL1261	Public on May 18 2011	2010-05-19	2011-05-18	RNA	P12 retinas of control mice	Mus musculus	tissue: retina; genotype: otx2 flox/flox; Crx-Cre- (control); time: P12	total RNA	biotin	NA	The mouse retinas were dissected using forceps.; Total RNA (5 ug) of the retina was isolated using TRIzol reagent (Invitrogen) and converted to cDNA using One-Cycle cDNA synthesis kit (Affymetrix) according to the manufactureâ€™s instruction.	Biotin-labeled cRNA was prepared using IVT labeling kit.	NA	NA	NA	NA	NA	NA	NA	NA	cRNA was hybridized to GeneChip mouse genome 430 2.0 arrayin Hybridization Oven 640. GeneChips were washed and stained in the Affymetrix Fluidics Station 450	Gene expression data from the control retina at P12	Signal intensity was determined using GeneChip Operating Software 1.4.	Name: Takahisa Furukawa; Laboratory: Furukawa Lab; Department: Developmental Biology; Institute: Osaka Bioscience Institute; Address: 6-2-4 Furuedai; City: Suita; State: Osaka; Zip/postal_code: 565-0874; Country: Japan	ftp://ftp.ncbi.nlm.nih.gov/geo/samples/GSM544nnn/GSM544748/suppl/GSM544748_P12-ex2-WT.CEL.gz	45101	1	whole.retina	12
99	499845	P12-control-ex3	GSM544749	GSE21900	GPL1261	Public on May 18 2011	2010-05-19	2011-05-18	RNA	P12 retinas of control mice	Mus musculus	tissue: retina; genotype: otx2 flox/flox; Crx-Cre- (control); time: P12	total RNA	biotin	NA	The mouse retinas were dissected using forceps.; Total RNA (5 ug) of the retina was isolated using TRIzol reagent (Invitrogen) and converted to cDNA using One-Cycle cDNA synthesis kit (Affymetrix) according to the manufactureâ€™s instruction.	Biotin-labeled cRNA was prepared using IVT labeling kit.	NA	NA	NA	NA	NA	NA	NA	NA	cRNA was hybridized to GeneChip mouse genome 430 2.0 arrayin Hybridization Oven 640. GeneChips were washed and stained in the Affymetrix Fluidics Station 450	Gene expression data from the Otx2 CKO retina at P12	Signal intensity was determined using GeneChip Operating Software 1.4.	Name: Takahisa Furukawa; Laboratory: Furukawa Lab; Department: Developmental Biology; Institute: Osaka Bioscience Institute; Address: 6-2-4 Furuedai; City: Suita; State: Osaka; Zip/postal_code: 565-0874; Country: Japan	ftp://ftp.ncbi.nlm.nih.gov/geo/samples/GSM544nnn/GSM544749/suppl/GSM544749_P12-ex3-WT.CEL.gz	45101	1	whole.retina	12
103	500271	C57Bl/6 P21, wildtype retina, 1	GSM545221	GSE21944	GPL1261	Public on Jul 02 2010	2010-05-19	2010-07-02	RNA	C57Bl/6 P21, wildtype, 2 pooled retinas	Mus musculus	strain: C57Bl/6 wildtype; sex: Mixed; age: P21	total RNA	Biotin	Microdissection into RNAlater (Ambion).	RNeasy Kit (QIAGEN).	One round amplification protocol for total RNA following Affymetrixâ€™ specifications using T7 promoter oligo dT primer for cDNA synthesis, and ENZO IVT kit (www.affymetrix.com, GeneChip Expression Analysis, Technical Manual).	NA	NA	NA	NA	NA	NA	NA	NA	16hrs at 45Â° C with rotation (60rpm) as described by Affymetrix in their GeneChip Expression Analysis Technical Manual.	Hybridization was performed by the Johns Hopkins Medical Institutions Microarray Core Facility.	Image analysis using GCOS 1.4, using MAS 5.0 algorithm and manufacturerâ€™s specifications. Global scaling of images to a target intensity of 150.	Name: Seth Blackshaw; Email: sblack@jhmi.edu; Department: Neuroscience ; Institute: The Johns Hopkins University; Address: 733 N. Broadway, Suite 351; City: Baltimore; State: MD; Zip/postal_code: 21205; Country: USA	ftp://ftp.ncbi.nlm.nih.gov/geo/samples/GSM545nnn/GSM545221/suppl/GSM545221.CEL.gz; ftp://ftp.ncbi.nlm.nih.gov/geo/samples/GSM545nnn/GSM545221/suppl/GSM545221.CHP.gz	45101	1	whole.retina	21
104	500773	C57Bl/6 P21, wildtype retina, 2	GSM545855	GSE21944	GPL1261	Public on Jul 02 2010	2010-05-20	2010-07-02	RNA	C57Bl/6 P21, wildtype, 2 pooled retinas	Mus musculus	strain: C57Bl/6 wildtype; sex: Mixed; age: P21	total RNA	Biotin	Microdissection into RNAlater (Ambion).	RNeasy Kit (QIAGEN).	One round amplification protocol for total RNA following Affymetrixâ€™ specifications using T7 promoter oligo dT primer for cDNA synthesis, and ENZO IVT kit (www.affymetrix.com, GeneChip Expression Analysis, Technical Manual).	NA	NA	NA	NA	NA	NA	NA	NA	16hrs at 45Â° C with rotation (60rpm) as described by Affymetrix in their GeneChip Expression Analysis Technical Manual.	Hybridization was performed by the Johns Hopkins Medical Institutions Microarray Core Facility.	Image analysis using GCOS 1.4, using MAS 5.0 algorithm and manufacturerâ€™s specifications. Global scaling of images to a target intensity of 150.	Name: Seth Blackshaw; Email: sblack@jhmi.edu; Department: Neuroscience ; Institute: The Johns Hopkins University; Address: 733 N. Broadway, Suite 351; City: Baltimore; State: MD; Zip/postal_code: 21205; Country: USA	ftp://ftp.ncbi.nlm.nih.gov/geo/samples/GSM545nnn/GSM545855/suppl/GSM545855.CEL.gz; ftp://ftp.ncbi.nlm.nih.gov/geo/samples/GSM545nnn/GSM545855/suppl/GSM545855.CHP.gz	45101	1	whole.retina	21
108	500777	C57Bl/6 P21, wildtype retina, 3	GSM545859	GSE21944	GPL1261	Public on Jul 02 2010	2010-05-20	2010-07-02	RNA	C57Bl/6 P21, wildtype, 2 pooled retinas	Mus musculus	strain: C57Bl/6 wildtype; sex: Mixed; age: P21	total RNA	Biotin	Microdissection into RNAlater (Ambion).	RNeasy Kit (QIAGEN).	One round amplification protocol for total RNA following Affymetrixâ€™ specifications using T7 promoter oligo dT primer for cDNA synthesis, and ENZO IVT kit (www.affymetrix.com, GeneChip Expression Analysis, Technical Manual).	NA	NA	NA	NA	NA	NA	NA	NA	16hrs at 45Â° C with rotation (60rpm) as described by Affymetrix in their GeneChip Expression Analysis Technical Manual.	Hybridization was performed by the Johns Hopkins Medical Institutions Microarray Core Facility.	Image analysis using GCOS 1.4, using MAS 5.0 algorithm and manufacturerâ€™s specifications. Global scaling of images to a target intensity of 150.	Name: Seth Blackshaw; Email: sblack@jhmi.edu; Department: Neuroscience ; Institute: The Johns Hopkins University; Address: 733 N. Broadway, Suite 351; City: Baltimore; State: MD; Zip/postal_code: 21205; Country: USA	ftp://ftp.ncbi.nlm.nih.gov/geo/samples/GSM545nnn/GSM545859/suppl/GSM545859.CEL.gz; ftp://ftp.ncbi.nlm.nih.gov/geo/samples/GSM545nnn/GSM545859/suppl/GSM545859.CHP.gz	45101	1	whole.retina	21
115	517878	Wild type retina P4, mouse A	GSM564246	GSE22824	GPL1261	Public on Jan 01 2011	2010-07-08	2011-01-01	RNA	Postnatal day 4 wild type (C57BL/6J) male mus musculus left and right total retinas	Mus musculus	strain: C57BL/6J; developmental stage: Postnatal day 4 (before retinal ganglion cell segregation in lateral geniculate nucleus); genotype/variation: wild type; gender: male; tissue: left and right total retinas; mouse: A	total RNA	biotin	NA	RNA was extracted using Qiagen RNeasy Micro Kit reagents and protocols	Samples were labeled using the Ambion MessageAmp II-Biotin Enhanced kit and protocols	NA	NA	NA	NA	NA	NA	NA	NA	10 ug of fragmented LGN aRNA or 20 ug of retinal RNA were hybridized on the Affymetrix Fluidics Station 450 following the protocol in the GeneChip Expression Analysis Technical Manual	WT P4 A retina; C57BL/6J	dCHIP, quantile normalization, PM/MM difference model	Name: Carol,Marie,Rubin; Email: c_rubin@sbcglobal.net; Department: Neurobiology Physiology and Behavior; Institute: University of California, Davis; Address: One Shields Avenue; City: Davis; State: CA; Zip/postal_code: 95616; Country: USA	ftp://ftp.ncbi.nlm.nih.gov/geo/samples/GSM564nnn/GSM564246/suppl/GSM564246.CEL.gz	45037	1	whole.retina	4
116	517879	Wild type retina P4, mouse B	GSM564247	GSE22824	GPL1261	Public on Jan 01 2011	2010-07-08	2011-01-01	RNA	Postnatal day 4 wild type (C57BL/6J) male mus musculus left and right total retinas	Mus musculus	strain: C57BL/6J; developmental stage: Postnatal day 4 (before retinal ganglion cell segregation in lateral geniculate nucleus); genotype/variation: wild type; gender: male; tissue: left and right total retinas; mouse: B	total RNA	biotin	NA	RNA was extracted using Qiagen RNeasy Micro Kit reagents and protocols	Samples were labeled using the Ambion MessageAmp II-Biotin Enhanced kit and protocols	NA	NA	NA	NA	NA	NA	NA	NA	10 ug of fragmented LGN aRNA or 20 ug of retinal RNA were hybridized on the Affymetrix Fluidics Station 450 following the protocol in the GeneChip Expression Analysis Technical Manual	WT P4 B retina; C57BL/6J	dCHIP, quantile normalization, PM/MM difference model	Name: Carol,Marie,Rubin; Email: c_rubin@sbcglobal.net; Department: Neurobiology Physiology and Behavior; Institute: University of California, Davis; Address: One Shields Avenue; City: Davis; State: CA; Zip/postal_code: 95616; Country: USA	ftp://ftp.ncbi.nlm.nih.gov/geo/samples/GSM564nnn/GSM564247/suppl/GSM564247.CEL.gz	45037	1	whole.retina	4
117	517880	Wild type retina P4, mouse C	GSM564248	GSE22824	GPL1261	Public on Jan 01 2011	2010-07-08	2011-01-01	RNA	Postnatal day 4 wild type (C57BL/6J) male mus musculus left and right total retinas	Mus musculus	strain: C57BL/6J; developmental stage: Postnatal day 4 (before retinal ganglion cell segregation in lateral geniculate nucleus); genotype/variation: wild type; gender: male; tissue: left and right total retinas; mouse: C	total RNA	biotin	NA	RNA was extracted using Qiagen RNeasy Micro Kit reagents and protocols	Samples were labeled using the Ambion MessageAmp II-Biotin Enhanced kit and protocols	NA	NA	NA	NA	NA	NA	NA	NA	10 ug of fragmented LGN aRNA or 20 ug of retinal RNA were hybridized on the Affymetrix Fluidics Station 450 following the protocol in the GeneChip Expression Analysis Technical Manual	WT P4 C retina; C57BL/6J	dCHIP, quantile normalization, PM/MM difference model	Name: Carol,Marie,Rubin; Email: c_rubin@sbcglobal.net; Department: Neurobiology Physiology and Behavior; Institute: University of California, Davis; Address: One Shields Avenue; City: Davis; State: CA; Zip/postal_code: 95616; Country: USA	ftp://ftp.ncbi.nlm.nih.gov/geo/samples/GSM564nnn/GSM564248/suppl/GSM564248.CEL.gz	45037	1	whole.retina	4
133	528444	Mouse retina_Control_ rep1	GSM575233	GSE23437	GPL1261	Public on Aug 06 2010	2010-08-05	2010-08-05	RNA	retina, no hyperoxia	Mus musculus	strain: C57BL/6J; tissue: Retina; age: Adult P80 - 120	total RNA	Biotin	Animals were placed in an oxygen chamber and exposed to 75% oxygen for a period of either 3, 7 or 14 days.	Total RNA was extracted from each retinal biopsy using Trizol and chloroform to separate the RNA from other cell components. The RNA was then purified and isolated using RNAqueous-Micro RNA isolation kit (Ambion, Inc., Austin, TX). In some cases where genomic DNA contamination was a concern, the RNA was DNAse treated.	Biotin-labeled cRNA was prepared according to the standard Affymetrix protocol from 500ng total RNA (Affymetrix manual, P/N 702646 Rev. 7).	NA	NA	NA	NA	NA	NA	NA	NA	Standard Affymetrix protocols were followed in the hybridisation, blocking and washing (GeneChipÂ® Expression Analysis Technical Manual (P/N 702232 Rev. 3)).	Gene expression data from mouse retina exposued to normal oxygen levels	RMA normalization performed in GeneSpring v 7.3.1. Log2 RMA data was quantile transformed to median sample baseline.	Name: Riccardo Natoli; Email: riccardo.natoli@anu.edu.au; Phone: + 61 2 6125 8559; Fax: + 61 2 6125 8680; Laboratory: Provis Lab; Department: CMBE; Institute: ANU; Address: Sullivans Creek Road; City: Acton; State: ACT; Zip/postal_code: 2617; Country: Australia	ftp://ftp.ncbi.nlm.nih.gov/geo/samples/GSM575nnn/GSM575233/suppl/GSM575233.CEL.gz; ftp://ftp.ncbi.nlm.nih.gov/geo/samples/GSM575nnn/GSM575233/suppl/GSM575233.CHP.gz	45101	1	whole.retina	100
134	528445	Mouse retina_Control_ rep2	GSM575234	GSE23437	GPL1261	Public on Aug 06 2010	2010-08-05	2010-08-05	RNA	retina, no hyperoxia	Mus musculus	strain: C57BL/6J; tissue: Retina; age: Adult P80 - 120	total RNA	Biotin	Animals were placed in an oxygen chamber and exposed to 75% oxygen for a period of either 3, 7 or 14 days.	Total RNA was extracted from each retinal biopsy using Trizol and chloroform to separate the RNA from other cell components. The RNA was then purified and isolated using RNAqueous-Micro RNA isolation kit (Ambion, Inc., Austin, TX). In some cases where genomic DNA contamination was a concern, the RNA was DNAse treated.	Biotin-labeled cRNA was prepared according to the standard Affymetrix protocol from 500ng total RNA (Affymetrix manual, P/N 702646 Rev. 7).	NA	NA	NA	NA	NA	NA	NA	NA	Standard Affymetrix protocols were followed in the hybridisation, blocking and washing (GeneChipÂ® Expression Analysis Technical Manual (P/N 702232 Rev. 3)).	Gene expression data from mouse retina exposued to normal oxygen levels	RMA normalization performed in GeneSpring v 7.3.1. Log2 RMA data was quantile transformed to median sample baseline.	Name: Riccardo Natoli; Email: riccardo.natoli@anu.edu.au; Phone: + 61 2 6125 8559; Fax: + 61 2 6125 8680; Laboratory: Provis Lab; Department: CMBE; Institute: ANU; Address: Sullivans Creek Road; City: Acton; State: ACT; Zip/postal_code: 2617; Country: Australia	ftp://ftp.ncbi.nlm.nih.gov/geo/samples/GSM575nnn/GSM575234/suppl/GSM575234.CEL.gz; ftp://ftp.ncbi.nlm.nih.gov/geo/samples/GSM575nnn/GSM575234/suppl/GSM575234.CHP.gz	45101	1	whole.retina	100
141	663217	rhoGFP PN4 retinal cells positive FAC sorted biological repliacte 1	GSM724539	GSE29318	GPL1261	Public on Jul 12 2011	2011-05-16	2011-07-12	RNA	retina of PN4 rhoGFP mice, FAC-sorted	Mus musculus	genotype: rhoGFP; cell type: rhoGFP positive retinal cell; genetic background: C57BL/6J-129/Ola; age: postnatal day 4	total RNA	biotin	NA	RNA was isolated using Qiagen RNeasy Mini Kit according to the manufacturer's instructions.	Biotinylated cRNA were prepared according to Ambion protocol from 200ng total RNA (MessageAmpTM II-Biotin Enhanced Kit, 2009, Ambion).	NA	NA	NA	NA	NA	NA	NA	NA	Following fragmentation, 15 ug of cRNA were hybridized for 16 hr at 45Â°C on Affymetrix Mouse Genome 430 2.0 Array. GeneChips were washed and stained in the Affymetrix Fluidics Station 450.	NA	The data were analyzed with GeneSpring GX 11.0.1 software (Agilent) using normalization algorithm RMA.	Name: Kai Postel; Institute: DFG-Center for Regenerative Therapies Dresden; Address: FiedlerstraÃŸe 42; City: Dresden; Zip/postal_code: 01307; Country: Germany	ftp://ftp.ncbi.nlm.nih.gov/geo/samples/GSM724nnn/GSM724539/suppl/GSM724539_P4_pos_1_Mouse430_2_.CEL.gz	45101	1	photoreceptors	4
142	663218	rhoGFP PN4 retinal cells positive FAC sorted biological repliacte 2	GSM724540	GSE29318	GPL1261	Public on Jul 12 2011	2011-05-16	2011-07-12	RNA	retina of PN4 rhoGFP mice, FAC-sorted	Mus musculus	genotype: rhoGFP; cell type: rhoGFP positive retinal cell; genetic background: C57BL/6J-129/Ola; age: postnatal day 4	total RNA	biotin	NA	RNA was isolated using Qiagen RNeasy Mini Kit according to the manufacturer's instructions.	Biotinylated cRNA were prepared according to Ambion protocol from 200ng total RNA (MessageAmpTM II-Biotin Enhanced Kit, 2009, Ambion).	NA	NA	NA	NA	NA	NA	NA	NA	Following fragmentation, 15 ug of cRNA were hybridized for 16 hr at 45Â°C on Affymetrix Mouse Genome 430 2.0 Array. GeneChips were washed and stained in the Affymetrix Fluidics Station 450.	NA	The data were analyzed with GeneSpring GX 11.0.1 software (Agilent) using normalization algorithm RMA.	Name: Kai Postel; Institute: DFG-Center for Regenerative Therapies Dresden; Address: FiedlerstraÃŸe 42; City: Dresden; Zip/postal_code: 01307; Country: Germany	ftp://ftp.ncbi.nlm.nih.gov/geo/samples/GSM724nnn/GSM724540/suppl/GSM724540_P4_pos_2_Mouse430_2_.CEL.gz	45101	1	photoreceptors	4
143	663219	rhoGFP PN4 retinal cells positive FAC sorted biological repliacte 3	GSM724541	GSE29318	GPL1261	Public on Jul 12 2011	2011-05-16	2011-07-12	RNA	retina of PN4 rhoGFP mice, FAC-sorted	Mus musculus	genotype: rhoGFP; cell type: rhoGFP positive retinal cell; genetic background: C57BL/6J-129/Ola; age: postnatal day 4	total RNA	biotin	NA	RNA was isolated using Qiagen RNeasy Mini Kit according to the manufacturer's instructions.	Biotinylated cRNA were prepared according to Ambion protocol from 200ng total RNA (MessageAmpTM II-Biotin Enhanced Kit, 2009, Ambion).	NA	NA	NA	NA	NA	NA	NA	NA	Following fragmentation, 15 ug of cRNA were hybridized for 16 hr at 45Â°C on Affymetrix Mouse Genome 430 2.0 Array. GeneChips were washed and stained in the Affymetrix Fluidics Station 450.	NA	The data were analyzed with GeneSpring GX 11.0.1 software (Agilent) using normalization algorithm RMA.	Name: Kai Postel; Institute: DFG-Center for Regenerative Therapies Dresden; Address: FiedlerstraÃŸe 42; City: Dresden; Zip/postal_code: 01307; Country: Germany	ftp://ftp.ncbi.nlm.nih.gov/geo/samples/GSM724nnn/GSM724541/suppl/GSM724541_P4_pos_3_Mouse430_2_.CEL.gz	45101	1	photoreceptors	4
144	663220	rhoGFP PN4 retinal cells negative FAC sorted biological repliacte 1	GSM724542	GSE29318	GPL1261	Public on Jul 12 2011	2011-05-16	2011-07-12	RNA	retina of PN4 rhoGFP mice, FAC-sorted	Mus musculus	genotype: rhoGFP; cell type: rhoGFP negative retinal cell; genetic background: C57BL/6J-129/Ola; age: postnatal day 4	total RNA	biotin	NA	RNA was isolated using Qiagen RNeasy Mini Kit according to the manufacturer's instructions.	Biotinylated cRNA were prepared according to Ambion protocol from 200ng total RNA (MessageAmpTM II-Biotin Enhanced Kit, 2009, Ambion).	NA	NA	NA	NA	NA	NA	NA	NA	Following fragmentation, 15 ug of cRNA were hybridized for 16 hr at 45Â°C on Affymetrix Mouse Genome 430 2.0 Array. GeneChips were washed and stained in the Affymetrix Fluidics Station 450.	NA	The data were analyzed with GeneSpring GX 11.0.1 software (Agilent) using normalization algorithm RMA.	Name: Kai Postel; Institute: DFG-Center for Regenerative Therapies Dresden; Address: FiedlerstraÃŸe 42; City: Dresden; Zip/postal_code: 01307; Country: Germany	ftp://ftp.ncbi.nlm.nih.gov/geo/samples/GSM724nnn/GSM724542/suppl/GSM724542_P4_neg_1_Mouse430_2_.CEL.gz	45101	1	whole.retina	4
145	663221	rhoGFP PN4 retinal cells negative FAC sorted biological repliacte 2	GSM724543	GSE29318	GPL1261	Public on Jul 12 2011	2011-05-16	2011-07-12	RNA	retina of PN4 rhoGFP mice, FAC-sorted	Mus musculus	genotype: rhoGFP; cell type: rhoGFP negative retinal cell; genetic background: C57BL/6J-129/Ola; age: postnatal day 4	total RNA	biotin	NA	RNA was isolated using Qiagen RNeasy Mini Kit according to the manufacturer's instructions.	Biotinylated cRNA were prepared according to Ambion protocol from 200ng total RNA (MessageAmpTM II-Biotin Enhanced Kit, 2009, Ambion).	NA	NA	NA	NA	NA	NA	NA	NA	Following fragmentation, 15 ug of cRNA were hybridized for 16 hr at 45Â°C on Affymetrix Mouse Genome 430 2.0 Array. GeneChips were washed and stained in the Affymetrix Fluidics Station 450.	NA	The data were analyzed with GeneSpring GX 11.0.1 software (Agilent) using normalization algorithm RMA.	Name: Kai Postel; Institute: DFG-Center for Regenerative Therapies Dresden; Address: FiedlerstraÃŸe 42; City: Dresden; Zip/postal_code: 01307; Country: Germany	ftp://ftp.ncbi.nlm.nih.gov/geo/samples/GSM724nnn/GSM724543/suppl/GSM724543_P4_neg_2_Mouse430_2_.CEL.gz	45101	1	whole.retina	4
146	663222	rhoGFP PN4 retinal cells negative FAC sorted biological repliacte 3	GSM724544	GSE29318	GPL1261	Public on Jul 12 2011	2011-05-16	2011-07-12	RNA	retina of PN4 rhoGFP mice, FAC-sorted	Mus musculus	genotype: rhoGFP; cell type: rhoGFP negative retinal cell; genetic background: C57BL/6J-129/Ola; age: postnatal day 4	total RNA	biotin	NA	RNA was isolated using Qiagen RNeasy Mini Kit according to the manufacturer's instructions.	Biotinylated cRNA were prepared according to Ambion protocol from 200ng total RNA (MessageAmpTM II-Biotin Enhanced Kit, 2009, Ambion).	NA	NA	NA	NA	NA	NA	NA	NA	Following fragmentation, 15 ug of cRNA were hybridized for 16 hr at 45Â°C on Affymetrix Mouse Genome 430 2.0 Array. GeneChips were washed and stained in the Affymetrix Fluidics Station 450.	NA	The data were analyzed with GeneSpring GX 11.0.1 software (Agilent) using normalization algorithm RMA.	Name: Kai Postel; Institute: DFG-Center for Regenerative Therapies Dresden; Address: FiedlerstraÃŸe 42; City: Dresden; Zip/postal_code: 01307; Country: Germany	ftp://ftp.ncbi.nlm.nih.gov/geo/samples/GSM724nnn/GSM724544/suppl/GSM724544_P4_neg_3_Mouse430_2_.CEL.gz	45101	1	whole.retina	4
166	750075	WT at post natal day 6, biological replicate 1	GSM820602	GSE33134	GPL1261	Public on Dec 31 2011	2011-10-21	2011-12-31	RNA	flow sorted rod photoreceptors	Mus musculus	tissue: Flow sorted Rod Photoreceptor; strain: C57BL/6; genotype: wild type; age: post natal day 6	total RNA	biotin	Retinas were dissociated and processed using FACS to recover rod photoreceptors expressing GFP.	Total RNA was extracted using RNAqueous-4PCR (Agilent).	Biotinylated cDNA were prepared for the MOE 430 2.0 arrays using Nugen Ovation RNA Amplification System starting with 40 ng of total RNA.	NA	NA	NA	NA	NA	NA	NA	NA	Following fragmentation and labelling, 2.2 ug of cDNA were hybridized at 45C for 18 hours. GeneChips were washed and scanner in the Affymetrix FS450.	WT at post natal day 6 flow sorted rod photorecteptor	We used GCRMA for normalization and background correction with median polish for probeset summarization. The analysis was done using the Gene Spring software from Agilent Technologies (http://www.genomics.agilent.com).	Name: Radu Cojocaru; Email: raducojo@gmail.com; Institute: Elsevier; Address: 5635 Fishers Lane, Suite 510; City: Rockville; State: MD; Zip/postal_code: 20852; Country: USA	ftp://ftp.ncbi.nlm.nih.gov/geo/samples/GSM820nnn/GSM820602/suppl/GSM820602_wt-P6-9.CEL.gz	45101	1	photoreceptors	6
167	750076	WT at post natal day 6, biological replicate 2	GSM820603	GSE33134	GPL1261	Public on Dec 31 2011	2011-10-21	2011-12-31	RNA	flow sorted rod photoreceptors	Mus musculus	tissue: Flow sorted Rod Photoreceptor; strain: C57BL/6; genotype: wild type; age: post natal day 6	total RNA	biotin	Retinas were dissociated and processed using FACS to recover rod photoreceptors expressing GFP.	Total RNA was extracted using RNAqueous-4PCR (Agilent).	Biotinylated cDNA were prepared for the MOE 430 2.0 arrays using Nugen Ovation RNA Amplification System starting with 40 ng of total RNA.	NA	NA	NA	NA	NA	NA	NA	NA	Following fragmentation and labelling, 2.2 ug of cDNA were hybridized at 45C for 18 hours. GeneChips were washed and scanner in the Affymetrix FS450.	WT at post natal day 6 flow sorted rod photoreceptor	We used GCRMA for normalization and background correction with median polish for probeset summarization. The analysis was done using the Gene Spring software from Agilent Technologies (http://www.genomics.agilent.com).	Name: Radu Cojocaru; Email: raducojo@gmail.com; Institute: Elsevier; Address: 5635 Fishers Lane, Suite 510; City: Rockville; State: MD; Zip/postal_code: 20852; Country: USA	ftp://ftp.ncbi.nlm.nih.gov/geo/samples/GSM820nnn/GSM820603/suppl/GSM820603_wt-P6-12-2.CEL.gz	45101	1	photoreceptors	6
168	750077	WT at post natal day 6, biological replicate 3	GSM820604	GSE33134	GPL1261	Public on Dec 31 2011	2011-10-21	2011-12-31	RNA	flow sorted rod photoreceptors	Mus musculus	tissue: Flow sorted Rod Photoreceptor; strain: C57BL/6; genotype: wild type; age: post natal day 6	total RNA	biotin	Retinas were dissociated and processed using FACS to recover rod photoreceptors expressing GFP.	Total RNA was extracted using RNAqueous-4PCR (Agilent).	Biotinylated cDNA were prepared for the MOE 430 2.0 arrays using Nugen Ovation RNA Amplification System starting with 40 ng of total RNA.	NA	NA	NA	NA	NA	NA	NA	NA	Following fragmentation and labelling, 2.2 ug of cDNA were hybridized at 45C for 18 hours. GeneChips were washed and scanner in the Affymetrix FS450.	WT at post natal day 6 flow sorted rod photoreceptor	We used GCRMA for normalization and background correction with median polish for probeset summarization. The analysis was done using the Gene Spring software from Agilent Technologies (http://www.genomics.agilent.com).	Name: Radu Cojocaru; Email: raducojo@gmail.com; Institute: Elsevier; Address: 5635 Fishers Lane, Suite 510; City: Rockville; State: MD; Zip/postal_code: 20852; Country: USA	ftp://ftp.ncbi.nlm.nih.gov/geo/samples/GSM820nnn/GSM820604/suppl/GSM820604_wt-P6-15.CEL.gz	45101	1	photoreceptors	6
169	750078	WT at post natal day 6, biological replicate 4	GSM820605	GSE33134	GPL1261	Public on Dec 31 2011	2011-10-21	2011-12-31	RNA	flow sorted rod photoreceptors	Mus musculus	tissue: Flow sorted Rod Photoreceptor; strain: C57BL/6; genotype: wild type; age: post natal day 6	total RNA	biotin	Retinas were dissociated and processed using FACS to recover rod photoreceptors expressing GFP.	Total RNA was extracted using RNAqueous-4PCR (Agilent).	Biotinylated cDNA were prepared for the MOE 430 2.0 arrays using Nugen Ovation RNA Amplification System starting with 40 ng of total RNA.	NA	NA	NA	NA	NA	NA	NA	NA	Following fragmentation and labelling, 2.2 ug of cDNA were hybridized at 45C for 18 hours. GeneChips were washed and scanner in the Affymetrix FS450.	WT at post natal day 6 flow sorted rod photoreceptor	We used GCRMA for normalization and background correction with median polish for probeset summarization. The analysis was done using the Gene Spring software from Agilent Technologies (http://www.genomics.agilent.com).	Name: Radu Cojocaru; Email: raducojo@gmail.com; Institute: Elsevier; Address: 5635 Fishers Lane, Suite 510; City: Rockville; State: MD; Zip/postal_code: 20852; Country: USA	ftp://ftp.ncbi.nlm.nih.gov/geo/samples/GSM820nnn/GSM820605/suppl/GSM820605_wt-P6-16-2.CEL.gz	45101	1	photoreceptors	6
170	750079	WT at post natal day 9, biological replicate 1	GSM820606	GSE33134	GPL1261	Public on Dec 31 2011	2011-10-21	2011-12-31	RNA	flow sorted rod photoreceptors	Mus musculus	tissue: Flow sorted Rod Photoreceptor; strain: C57BL/6; genotype: wild type; age: post natal day 9	total RNA	biotin	Retinas were dissociated and processed using FACS to recover rod photoreceptors expressing GFP.	Total RNA was extracted using RNAqueous-4PCR (Agilent).	Biotinylated cDNA were prepared for the MOE 430 2.0 arrays using Nugen Ovation RNA Amplification System starting with 40 ng of total RNA.	NA	NA	NA	NA	NA	NA	NA	NA	Following fragmentation and labelling, 2.2 ug of cDNA were hybridized at 45C for 18 hours. GeneChips were washed and scanner in the Affymetrix FS450.	WT at post natal day 9 flow sorted rod photorecteptor	We used GCRMA for normalization and background correction with median polish for probeset summarization. The analysis was done using the Gene Spring software from Agilent Technologies (http://www.genomics.agilent.com).	Name: Radu Cojocaru; Email: raducojo@gmail.com; Institute: Elsevier; Address: 5635 Fishers Lane, Suite 510; City: Rockville; State: MD; Zip/postal_code: 20852; Country: USA	ftp://ftp.ncbi.nlm.nih.gov/geo/samples/GSM820nnn/GSM820606/suppl/GSM820606_wt-P9-3.CEL.gz	45101	1	photoreceptors	9
171	750080	WT at post natal day 9, biological replicate 2	GSM820607	GSE33134	GPL1261	Public on Dec 31 2011	2011-10-21	2011-12-31	RNA	flow sorted rod photoreceptors	Mus musculus	tissue: Flow sorted Rod Photoreceptor; strain: C57BL/6; genotype: wild type; age: post natal day 9	total RNA	biotin	Retinas were dissociated and processed using FACS to recover rod photoreceptors expressing GFP.	Total RNA was extracted using RNAqueous-4PCR (Agilent).	Biotinylated cDNA were prepared for the MOE 430 2.0 arrays using Nugen Ovation RNA Amplification System starting with 40 ng of total RNA.	NA	NA	NA	NA	NA	NA	NA	NA	Following fragmentation and labelling, 2.2 ug of cDNA were hybridized at 45C for 18 hours. GeneChips were washed and scanner in the Affymetrix FS450.	WT at post natal day 9 flow sorted rod photoreceptor	We used GCRMA for normalization and background correction with median polish for probeset summarization. The analysis was done using the Gene Spring software from Agilent Technologies (http://www.genomics.agilent.com).	Name: Radu Cojocaru; Email: raducojo@gmail.com; Institute: Elsevier; Address: 5635 Fishers Lane, Suite 510; City: Rockville; State: MD; Zip/postal_code: 20852; Country: USA	ftp://ftp.ncbi.nlm.nih.gov/geo/samples/GSM820nnn/GSM820607/suppl/GSM820607_wt-P9-4.CEL.gz	45101	1	photoreceptors	9
172	750081	WT at post natal day 9, biological replicate 3	GSM820608	GSE33134	GPL1261	Public on Dec 31 2011	2011-10-21	2011-12-31	RNA	flow sorted rod photoreceptors	Mus musculus	tissue: Flow sorted Rod Photoreceptor; strain: C57BL/6; genotype: wild type; age: post natal day 9	total RNA	biotin	Retinas were dissociated and processed using FACS to recover rod photoreceptors expressing GFP.	Total RNA was extracted using RNAqueous-4PCR (Agilent).	Biotinylated cDNA were prepared for the MOE 430 2.0 arrays using Nugen Ovation RNA Amplification System starting with 40 ng of total RNA.	NA	NA	NA	NA	NA	NA	NA	NA	Following fragmentation and labelling, 2.2 ug of cDNA were hybridized at 45C for 18 hours. GeneChips were washed and scanner in the Affymetrix FS450.	WT at post natal day 9 flow sorted rod photoreceptor	We used GCRMA for normalization and background correction with median polish for probeset summarization. The analysis was done using the Gene Spring software from Agilent Technologies (http://www.genomics.agilent.com).	Name: Radu Cojocaru; Email: raducojo@gmail.com; Institute: Elsevier; Address: 5635 Fishers Lane, Suite 510; City: Rockville; State: MD; Zip/postal_code: 20852; Country: USA	ftp://ftp.ncbi.nlm.nih.gov/geo/samples/GSM820nnn/GSM820608/suppl/GSM820608_wt-P9-8.CEL.gz	45101	1	photoreceptors	9
173	750082	WT at post natal day 9, biological replicate 4	GSM820609	GSE33134	GPL1261	Public on Dec 31 2011	2011-10-21	2011-12-31	RNA	flow sorted rod photoreceptors	Mus musculus	tissue: Flow sorted Rod Photoreceptor; strain: C57BL/6; genotype: wild type; age: post natal day 9	total RNA	biotin	Retinas were dissociated and processed using FACS to recover rod photoreceptors expressing GFP.	Total RNA was extracted using RNAqueous-4PCR (Agilent).	Biotinylated cDNA were prepared for the MOE 430 2.0 arrays using Nugen Ovation RNA Amplification System starting with 40 ng of total RNA.	NA	NA	NA	NA	NA	NA	NA	NA	Following fragmentation and labelling, 2.2 ug of cDNA were hybridized at 45C for 18 hours. GeneChips were washed and scanner in the Affymetrix FS450.	WT at post natal day 9 flow sorted rod photoreceptor	We used GCRMA for normalization and background correction with median polish for probeset summarization. The analysis was done using the Gene Spring software from Agilent Technologies (http://www.genomics.agilent.com).	Name: Radu Cojocaru; Email: raducojo@gmail.com; Institute: Elsevier; Address: 5635 Fishers Lane, Suite 510; City: Rockville; State: MD; Zip/postal_code: 20852; Country: USA	ftp://ftp.ncbi.nlm.nih.gov/geo/samples/GSM820nnn/GSM820609/suppl/GSM820609_wt-P9-A.CEL.gz	45101	1	photoreceptors	9
174	750083	WT at post natal day 14, biological replicate 1	GSM820610	GSE33134	GPL1261	Public on Dec 31 2011	2011-10-21	2011-12-31	RNA	flow sorted rod photoreceptors	Mus musculus	tissue: Flow sorted Rod Photoreceptor; strain: C57BL/6; genotype: wild type; age: post natal day 14	total RNA	biotin	Retinas were dissociated and processed using FACS to recover rod photoreceptors expressing GFP.	Total RNA was extracted using RNAqueous-4PCR (Agilent).	Biotinylated cDNA were prepared for the MOE 430 2.0 arrays using Nugen Ovation RNA Amplification System starting with 40 ng of total RNA.	NA	NA	NA	NA	NA	NA	NA	NA	Following fragmentation and labelling, 2.2 ug of cDNA were hybridized at 45C for 18 hours. GeneChips were washed and scanner in the Affymetrix FS450.	WT at post natal day 14 flow sorted rod photorecteptor	We used GCRMA for normalization and background correction with median polish for probeset summarization. The analysis was done using the Gene Spring software from Agilent Technologies (http://www.genomics.agilent.com).	Name: Radu Cojocaru; Email: raducojo@gmail.com; Institute: Elsevier; Address: 5635 Fishers Lane, Suite 510; City: Rockville; State: MD; Zip/postal_code: 20852; Country: USA	ftp://ftp.ncbi.nlm.nih.gov/geo/samples/GSM820nnn/GSM820610/suppl/GSM820610_wt-P14-13.CEL.gz	45101	1	photoreceptors	14
175	750084	WT at post natal day 14, biological replicate 2	GSM820611	GSE33134	GPL1261	Public on Dec 31 2011	2011-10-21	2011-12-31	RNA	flow sorted rod photoreceptors	Mus musculus	tissue: Flow sorted Rod Photoreceptor; strain: C57BL/6; genotype: wild type; age: post natal day 14	total RNA	biotin	Retinas were dissociated and processed using FACS to recover rod photoreceptors expressing GFP.	Total RNA was extracted using RNAqueous-4PCR (Agilent).	Biotinylated cDNA were prepared for the MOE 430 2.0 arrays using Nugen Ovation RNA Amplification System starting with 40 ng of total RNA.	NA	NA	NA	NA	NA	NA	NA	NA	Following fragmentation and labelling, 2.2 ug of cDNA were hybridized at 45C for 18 hours. GeneChips were washed and scanner in the Affymetrix FS450.	WT at post natal day 14 flow sorted rod photoreceptor	We used GCRMA for normalization and background correction with median polish for probeset summarization. The analysis was done using the Gene Spring software from Agilent Technologies (http://www.genomics.agilent.com).	Name: Radu Cojocaru; Email: raducojo@gmail.com; Institute: Elsevier; Address: 5635 Fishers Lane, Suite 510; City: Rockville; State: MD; Zip/postal_code: 20852; Country: USA	ftp://ftp.ncbi.nlm.nih.gov/geo/samples/GSM820nnn/GSM820611/suppl/GSM820611_wt-P14-14-2.CEL.gz	45101	1	photoreceptors	14
176	750085	WT at post natal day 14, biological replicate 3	GSM820612	GSE33134	GPL1261	Public on Dec 31 2011	2011-10-21	2011-12-31	RNA	flow sorted rod photoreceptors	Mus musculus	tissue: Flow sorted Rod Photoreceptor; strain: C57BL/6; genotype: wild type; age: post natal day 14	total RNA	biotin	Retinas were dissociated and processed using FACS to recover rod photoreceptors expressing GFP.	Total RNA was extracted using RNAqueous-4PCR (Agilent).	Biotinylated cDNA were prepared for the MOE 430 2.0 arrays using Nugen Ovation RNA Amplification System starting with 40 ng of total RNA.	NA	NA	NA	NA	NA	NA	NA	NA	Following fragmentation and labelling, 2.2 ug of cDNA were hybridized at 45C for 18 hours. GeneChips were washed and scanner in the Affymetrix FS450.	WT at post natal day 14 flow sorted rod photoreceptor	We used GCRMA for normalization and background correction with median polish for probeset summarization. The analysis was done using the Gene Spring software from Agilent Technologies (http://www.genomics.agilent.com).	Name: Radu Cojocaru; Email: raducojo@gmail.com; Institute: Elsevier; Address: 5635 Fishers Lane, Suite 510; City: Rockville; State: MD; Zip/postal_code: 20852; Country: USA	ftp://ftp.ncbi.nlm.nih.gov/geo/samples/GSM820nnn/GSM820612/suppl/GSM820612_wt-P14-D.CEL.gz	45101	1	photoreceptors	14
181	1141543	intact retina from B6 mouse, biological rep1	GSM1306529	GSE54056	GPL1261	Public on Mar 06 2014	2014-01-14	2014-03-06	RNA	whole retina from B6 mouse	Mus musculus	tissue: neural retina; protocol: intact whole retina; strain: C57BL/6NCrSlc; age: 10 weeks old	total RNA	biotin	Eyes were enucleated from mice, and the neural retina was separated from the cornea, the sclera, the lens, the iris, the ciliary body, and the pigmented epithelium	Total RNA was extracted using RNeasy (QIAGEN) according to the manufacturer's instructions.	Biotinylated cRNA were prepared according to the standard Affymetrix protocol from 100 ng total RNA, according to the 3' IVT Expression Kit User Manual	NA	NA	NA	NA	NA	NA	NA	NA	Following fragmentation, 10 ug of cRNA were hybridized for 16 hr at 45C on GeneChip Mouse Genome 430.2.0 Array.	Gene expression data from B6 mouse retina; 11062101_B6primary1_MG430_2	The data were analyzed with RMA algorithm in the R/Bioconductor (http://www.bioconductor.org/) package	Name: Masayo Takahashi; Laboratory: Laboratory for Retinal Regeneration; Institute: RIKEN CDB; Address: 2-2-3 Minamimachi, Minatojima, Chu-o-ku; City: Kobe; State: Hyogo; Zip/postal_code: 650-0047; Country: Japan	ftp://ftp.ncbi.nlm.nih.gov/geo/samples/GSM1306nnn/GSM1306529/suppl/GSM1306529_11062101_B6primary1_MG430_2.CEL.gz	45101	1	whole.retina	70
182	1141544	intact retina from B6 mouse, biological rep2	GSM1306530	GSE54056	GPL1261	Public on Mar 06 2014	2014-01-14	2014-03-06	RNA	whole retina from B6 mouse	Mus musculus	tissue: neural retina; protocol: intact whole retina; strain: C57BL/6NCrSlc; age: 10 weeks old	total RNA	biotin	Eyes were enucleated from mice, and the neural retina was separated from the cornea, the sclera, the lens, the iris, the ciliary body, and the pigmented epithelium	Total RNA was extracted using RNeasy (QIAGEN) according to the manufacturer's instructions.	Biotinylated cRNA were prepared according to the standard Affymetrix protocol from 100 ng total RNA, according to the 3' IVT Expression Kit User Manual	NA	NA	NA	NA	NA	NA	NA	NA	Following fragmentation, 10 ug of cRNA were hybridized for 16 hr at 45C on GeneChip Mouse Genome 430.2.0 Array.	Gene expression data from B6 mouse retina; 11062102_B6primary2_MG430_2	The data were analyzed with RMA algorithm in the R/Bioconductor (http://www.bioconductor.org/) package	Name: Masayo Takahashi; Laboratory: Laboratory for Retinal Regeneration; Institute: RIKEN CDB; Address: 2-2-3 Minamimachi, Minatojima, Chu-o-ku; City: Kobe; State: Hyogo; Zip/postal_code: 650-0047; Country: Japan	ftp://ftp.ncbi.nlm.nih.gov/geo/samples/GSM1306nnn/GSM1306530/suppl/GSM1306530_11062102_B6primary2_MG430_2.CEL.gz	45101	1	whole.retina	70
195	1269205	OC2-WT adult 1	GSM1397411	GSE57918	GPL1261	Public on Nov 11 2014	2014-05-22	2014-11-11	RNA	OC2-WT adult retina	Mus musculus	tissue: retina; Stage: adult; onecut genotype: WT	total RNA	biotin	Retinas were isolated from adult eyes and rinsed in 1X PBS.	Trireagent extraction of total RNA was performed according to the manufacturer's instructions.	Total RNA wa amplified, biotinylated, and fragmented using the Ambion MessageAmp III RNA amplification kit according to manufacturer's instructions.	NA	NA	NA	NA	NA	NA	NA	NA	Amplified RNA was hybridized to Affymetrix GeneChip Mouse Genome 430 2.0 arrays at the Iowa State University GeneChip Facility.	Gene expression information from isolated adult retinas	The data were analyzed with Microarray Suite version 5.0 (MAS 5.0) using Affymetrix default analysis settings and global scaling as normalization method.	Name: Jeffrey,M,Trimarchi; Email: jtrimarc@iastate.edu; Phone: 2172190210; Laboratory: Trimarchi; Department: GDCB; Institute: Iowa State University; Address: 3188 Molecular Biology Building; City: Ames; State: IA; Zip/postal_code: 50014; Country: USA	ftp://ftp.ncbi.nlm.nih.gov/geo/samples/GSM1397nnn/GSM1397411/suppl/GSM1397411_WT_adult_OC2_1.CEL.gz; ftp://ftp.ncbi.nlm.nih.gov/geo/samples/GSM1397nnn/GSM1397411/suppl/GSM1397411_WT_adult_OC2_1.mas5.CHP.gz	45101	1	whole.retina	na
196	1269206	OC2-WT adult 2	GSM1397412	GSE57918	GPL1261	Public on Nov 11 2014	2014-05-22	2014-11-11	RNA	OC2-WT adult retina	Mus musculus	tissue: retina; Stage: adult; onecut genotype: WT	total RNA	biotin	Retinas were isolated from adult eyes and rinsed in 1X PBS.	Trireagent extraction of total RNA was performed according to the manufacturer's instructions.	Total RNA wa amplified, biotinylated, and fragmented using the Ambion MessageAmp III RNA amplification kit according to manufacturer's instructions.	NA	NA	NA	NA	NA	NA	NA	NA	Amplified RNA was hybridized to Affymetrix GeneChip Mouse Genome 430 2.0 arrays at the Iowa State University GeneChip Facility.	Gene expression information from isolated adult retinas	The data were analyzed with Microarray Suite version 5.0 (MAS 5.0) using Affymetrix default analysis settings and global scaling as normalization method.	Name: Jeffrey,M,Trimarchi; Email: jtrimarc@iastate.edu; Phone: 2172190210; Laboratory: Trimarchi; Department: GDCB; Institute: Iowa State University; Address: 3188 Molecular Biology Building; City: Ames; State: IA; Zip/postal_code: 50014; Country: USA	ftp://ftp.ncbi.nlm.nih.gov/geo/samples/GSM1397nnn/GSM1397412/suppl/GSM1397412_WT_adult_OC2_2.CEL.gz; ftp://ftp.ncbi.nlm.nih.gov/geo/samples/GSM1397nnn/GSM1397412/suppl/GSM1397412_WT_adult_OC2_2.mas5.CHP.gz	45101	1	whole.retina	na
197	1269570	WT OC2 Adult 3	GSM1442336	GSE57918	GPL1261	Public on Nov 11 2014	2014-07-22	2014-11-12	RNA	OC2-WT adult retina	Mus musculus	tissue: retina; Stage: adult; onecut genotype: OC2-WT	total RNA	biotin	Retinas were isolated from adult eyes and rinsed in 1X PBS.	Trireagent extraction of total RNA was performed according to the manufacturer's instructions.	Total RNA wa amplified, biotinylated, and fragmented using the Ambion MessageAmp III RNA amplification kit according to manufacturer's instructions.	NA	NA	NA	NA	NA	NA	NA	NA	Amplified RNA was hybridized to Affymetrix GeneChip Mouse Genome 430 2.0 arrays at the Iowa State University GeneChip Facility.	Gene expression information from isolated adult retinas	The data were analyzed with Microarray Suite version 5.0 (MAS 5.0) using Affymetrix default analysis settings and global scaling as normalization method.	Name: Jeffrey,M,Trimarchi; Email: jtrimarc@iastate.edu; Phone: 2172190210; Laboratory: Trimarchi; Department: GDCB; Institute: Iowa State University; Address: 3188 Molecular Biology Building; City: Ames; State: IA; Zip/postal_code: 50014; Country: USA	ftp://ftp.ncbi.nlm.nih.gov/geo/samples/GSM1442nnn/GSM1442336/suppl/GSM1442336_WT_OC2_Adult_3.CEL.gz; ftp://ftp.ncbi.nlm.nih.gov/geo/samples/GSM1442nnn/GSM1442336/suppl/GSM1442336_WT_OC2_Adult_3.CHP.gz	45101	1	whole.retina	na
199	1888523	RPE BSS day 7 bio rep1	GSM1208403	GSE49872	GPL1261	Public on Aug 01 2016	2013-08-14	2016-08-01	RNA	RPE BSS control day 7	Mus musculus	strain: C57BL6/J; gender: males; organ: eye; tissue: RPE/choroid; treatment: BSS control; day: 7	total RNA	biotin	Animals were sacrificed within CO2 chamber, eyes were enucleated, disected, retinal tissue was removed and quicky immersed into 300ul RNALater. Samples were stored in RNALater at -20C till the total RNA isolation step.	Total RNA was isolated using Qiagen RNeasy kit according to the manufacturer's instructions.	Biotinylated cRNA were prepared according to the two-cycle Affymetrix protocol from 0.100 ug total RNA (Expression Analysis Technical Manual, 2001, Affymetrix).	NA	NA	NA	NA	NA	NA	NA	NA	Following fragmentation, 10 ug of cRNA were hybridized for 16 hr at 45C on GeneChip Mouse 430 2.0 Genome Array. GeneChips were washed and stained in the Affymetrix Fluidics Station 450.	Gene expression data at day 7 from the eyes intravitreally injected with BSS at day 0	The data were analyzed with GeneSpring GX 11 using RMA algorhitm as analysis and normalization method.	Name: Zeljka Smit-McBride; Email: zsmcbride@ucdavis.edu; Laboratory: Vitreoretinal Research Lab; Department: Ophthalmology; Institute: UC Davis; Address: One Shields Ave, Tupper Hall #2403; City: Davis; State: CA; Zip/postal_code: 95616; Country: USA	ftp://ftp.ncbi.nlm.nih.gov/geo/samples/GSM1208nnn/GSM1208403/suppl/GSM1208403_Con-001_RPE.CEL.gz	45101	1	RPE	49
200	1888524	RPE BSS day 7 bio rep2	GSM1208404	GSE49872	GPL1261	Public on Aug 01 2016	2013-08-14	2016-08-01	RNA	RPE BSS control day 7	Mus musculus	strain: C57BL6/J; gender: males; organ: eye; tissue: RPE/choroid; treatment: BSS control; day: 7	total RNA	biotin	Animals were sacrificed within CO2 chamber, eyes were enucleated, disected, retinal tissue was removed and quicky immersed into 300ul RNALater. Samples were stored in RNALater at -20C till the total RNA isolation step.	Total RNA was isolated using Qiagen RNeasy kit according to the manufacturer's instructions.	Biotinylated cRNA were prepared according to the two-cycle Affymetrix protocol from 0.100 ug total RNA (Expression Analysis Technical Manual, 2001, Affymetrix).	NA	NA	NA	NA	NA	NA	NA	NA	Following fragmentation, 10 ug of cRNA were hybridized for 16 hr at 45C on GeneChip Mouse 430 2.0 Genome Array. GeneChips were washed and stained in the Affymetrix Fluidics Station 450.	Gene expression data at day 7 from the eyes intravitreally injected with BSS at day 0	The data were analyzed with GeneSpring GX 11 using RMA algorhitm as analysis and normalization method.	Name: Zeljka Smit-McBride; Email: zsmcbride@ucdavis.edu; Laboratory: Vitreoretinal Research Lab; Department: Ophthalmology; Institute: UC Davis; Address: One Shields Ave, Tupper Hall #2403; City: Davis; State: CA; Zip/postal_code: 95616; Country: USA	ftp://ftp.ncbi.nlm.nih.gov/geo/samples/GSM1208nnn/GSM1208404/suppl/GSM1208404_Con-003_RPE.CEL.gz	45101	1	RPE	49
201	1888525	RPE BSS day 7 bio rep3	GSM1208405	GSE49872	GPL1261	Public on Aug 01 2016	2013-08-14	2016-08-01	RNA	RPE BSS control day 7	Mus musculus	strain: C57BL6/J; gender: males; organ: eye; tissue: RPE/choroid; treatment: BSS control; day: 7	total RNA	biotin	Animals were sacrificed within CO2 chamber, eyes were enucleated, disected, retinal tissue was removed and quicky immersed into 300ul RNALater. Samples were stored in RNALater at -20C till the total RNA isolation step.	Total RNA was isolated using Qiagen RNeasy kit according to the manufacturer's instructions.	Biotinylated cRNA were prepared according to the two-cycle Affymetrix protocol from 0.100 ug total RNA (Expression Analysis Technical Manual, 2001, Affymetrix).	NA	NA	NA	NA	NA	NA	NA	NA	Following fragmentation, 10 ug of cRNA were hybridized for 16 hr at 45C on GeneChip Mouse 430 2.0 Genome Array. GeneChips were washed and stained in the Affymetrix Fluidics Station 450.	Gene expression data at day 7 from the eyes intravitreally injected with BSS at day 0	The data were analyzed with GeneSpring GX 11 using RMA algorhitm as analysis and normalization method.	Name: Zeljka Smit-McBride; Email: zsmcbride@ucdavis.edu; Laboratory: Vitreoretinal Research Lab; Department: Ophthalmology; Institute: UC Davis; Address: One Shields Ave, Tupper Hall #2403; City: Davis; State: CA; Zip/postal_code: 95616; Country: USA	ftp://ftp.ncbi.nlm.nih.gov/geo/samples/GSM1208nnn/GSM1208405/suppl/GSM1208405_Con-004_RPE.CEL.gz	45101	1	RPE	49
208	1888532	RPE BSS day 30 bio rep1	GSM1208412	GSE49872	GPL1261	Public on Aug 01 2016	2013-08-14	2016-08-01	RNA	RPE BSS control day 30	Mus musculus	strain: C57BL6/J; gender: males; organ: eye; tissue: RPE/choroid; treatment: BSS control; day: 30	total RNA	biotin	Animals were sacrificed within CO2 chamber, eyes were enucleated, disected, retinal tissue was removed and quicky immersed into 300ul RNALater. Samples were stored in RNALater at -20C till the total RNA isolation step.	Total RNA was isolated using Qiagen RNeasy kit according to the manufacturer's instructions.	Biotinylated cRNA were prepared according to the two-cycle Affymetrix protocol from 0.100 ug total RNA (Expression Analysis Technical Manual, 2001, Affymetrix).	NA	NA	NA	NA	NA	NA	NA	NA	Following fragmentation, 10 ug of cRNA were hybridized for 16 hr at 45C on GeneChip Mouse 430 2.0 Genome Array. GeneChips were washed and stained in the Affymetrix Fluidics Station 450.	Gene expression data at day 30 from the eyes intravitreally injected with BSS at day 0	The data were analyzed with GeneSpring GX 11 using RMA algorhitm as analysis and normalization method.	Name: Zeljka Smit-McBride; Email: zsmcbride@ucdavis.edu; Laboratory: Vitreoretinal Research Lab; Department: Ophthalmology; Institute: UC Davis; Address: One Shields Ave, Tupper Hall #2403; City: Davis; State: CA; Zip/postal_code: 95616; Country: USA	ftp://ftp.ncbi.nlm.nih.gov/geo/samples/GSM1208nnn/GSM1208412/suppl/GSM1208412_Con-013_RPE.CEL.gz	45101	1	RPE	72
209	1888533	RPE BSS day 30 bio rep2	GSM1208413	GSE49872	GPL1261	Public on Aug 01 2016	2013-08-14	2016-08-01	RNA	RPE BSS control day 30	Mus musculus	strain: C57BL6/J; gender: males; organ: eye; tissue: RPE/choroid; treatment: BSS control; day: 30	total RNA	biotin	Animals were sacrificed within CO2 chamber, eyes were enucleated, disected, retinal tissue was removed and quicky immersed into 300ul RNALater. Samples were stored in RNALater at -20C till the total RNA isolation step.	Total RNA was isolated using Qiagen RNeasy kit according to the manufacturer's instructions.	Biotinylated cRNA were prepared according to the two-cycle Affymetrix protocol from 0.100 ug total RNA (Expression Analysis Technical Manual, 2001, Affymetrix).	NA	NA	NA	NA	NA	NA	NA	NA	Following fragmentation, 10 ug of cRNA were hybridized for 16 hr at 45C on GeneChip Mouse 430 2.0 Genome Array. GeneChips were washed and stained in the Affymetrix Fluidics Station 450.	Gene expression data at day 30 from the eyes intravitreally injected with BSS at day 0	The data were analyzed with GeneSpring GX 11 using RMA algorhitm as analysis and normalization method.	Name: Zeljka Smit-McBride; Email: zsmcbride@ucdavis.edu; Laboratory: Vitreoretinal Research Lab; Department: Ophthalmology; Institute: UC Davis; Address: One Shields Ave, Tupper Hall #2403; City: Davis; State: CA; Zip/postal_code: 95616; Country: USA	ftp://ftp.ncbi.nlm.nih.gov/geo/samples/GSM1208nnn/GSM1208413/suppl/GSM1208413_Con-014_RPE.CEL.gz	45101	1	RPE	72
210	1888534	RPE BSS day 30 bio rep3	GSM1208414	GSE49872	GPL1261	Public on Aug 01 2016	2013-08-14	2016-08-01	RNA	RPE BSS control day 30	Mus musculus	strain: C57BL6/J; gender: males; organ: eye; tissue: RPE/choroid; treatment: BSS control; day: 30	total RNA	biotin	Animals were sacrificed within CO2 chamber, eyes were enucleated, disected, retinal tissue was removed and quicky immersed into 300ul RNALater. Samples were stored in RNALater at -20C till the total RNA isolation step.	Total RNA was isolated using Qiagen RNeasy kit according to the manufacturer's instructions.	Biotinylated cRNA were prepared according to the two-cycle Affymetrix protocol from 0.100 ug total RNA (Expression Analysis Technical Manual, 2001, Affymetrix).	NA	NA	NA	NA	NA	NA	NA	NA	Following fragmentation, 10 ug of cRNA were hybridized for 16 hr at 45C on GeneChip Mouse 430 2.0 Genome Array. GeneChips were washed and stained in the Affymetrix Fluidics Station 450.	Gene expression data at day 30 from the eyes intravitreally injected with BSS at day 0	The data were analyzed with GeneSpring GX 11 using RMA algorhitm as analysis and normalization method.	Name: Zeljka Smit-McBride; Email: zsmcbride@ucdavis.edu; Laboratory: Vitreoretinal Research Lab; Department: Ophthalmology; Institute: UC Davis; Address: One Shields Ave, Tupper Hall #2403; City: Davis; State: CA; Zip/postal_code: 95616; Country: USA	ftp://ftp.ncbi.nlm.nih.gov/geo/samples/GSM1208nnn/GSM1208414/suppl/GSM1208414_Con-016_RPE.CEL.gz	45101	1	RPE	72
